# Supplementary material
Source: PubMed Central journal article supplement (PMC6230477)

## Return of the lysergamides. Part III: Analytical characterization of *N*<sup>6</sup>-ethyl-6-norlysergic acid diethylamide (ETH-LAD) and 1-propionyl ETH-LAD (1P-ETH-LAD)

Simon D. Brandt,<sup>a,\*</sup> Pierce V. Kavanagh,<sup>b</sup> Folker Westphal,<sup>c</sup> Simon P. Elliott,<sup>d</sup> Jason Wallach,<sup>e</sup> Alexander Stratford,<sup>f</sup> David E. Nichols,<sup>g</sup> Adam L. Halberstadt<sup>h</sup>

<sup>a</sup> School of Pharmacy and Biomolecular Sciences, Liverpool John Moores University, Byrom Street, Liverpool L3 3AF, UK

<sup>b</sup> Department of Pharmacology and Therapeutics, School of Medicine, Trinity Centre for Health Sciences, St. James Hospital, Dublin 8, Ireland

<sup>c</sup> State Bureau of Criminal Investigation Schleswig-Holstein, Section Narcotics/Toxicology, Mühlenweg 166, D-24116 Kiel, Germany

<sup>d</sup> ROAR Forensics, Malvern Hills Science Park, Geraldine Road, WR14 3SZ, UK

<sup>e</sup> Department of Pharmaceutical Sciences, Philadelphia College of Pharmacy, University of the Sciences, 600 South 43rd Street, Philadelphia, PA 19104, USA

<sup>f</sup> Synex Synthetics BV, Poortweg 4, 2612 PA Delft, The Netherlands

<sup>g</sup> Division of Chemical Biology and Medicinal Chemistry, University of North Carolina, Genetic Medicine Building, 120 Mason Farm Road, Chapel Hill, NC 27599, USA

<sup>h</sup> Department of Psychiatry, University of California San Diego, 9500 Gilman Drive, La Jolla, CA 92093-0804, USA

\* Correspondence to: Simon D. Brandt, School of Pharmacy and Biomolecular Sciences, Liverpool John Moores University, Byrom Street, Liverpool, L3 3AF, UK. E-Mail: s.brandt@ljmu.ac.uk

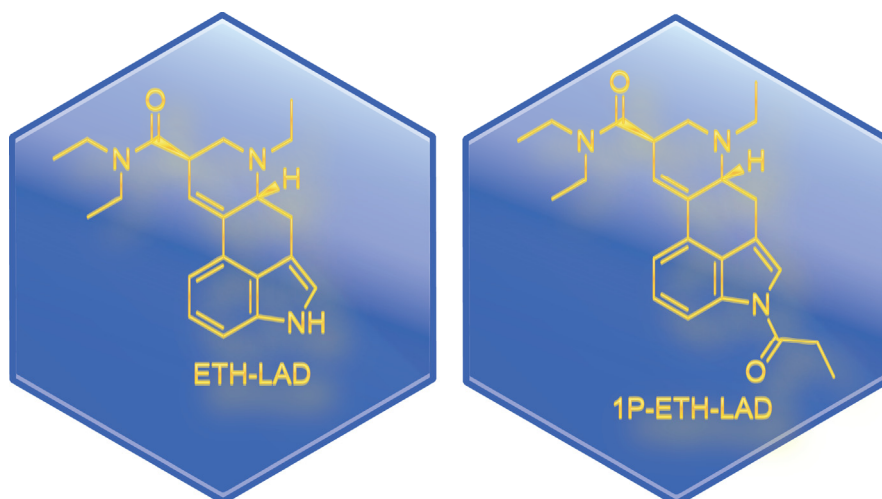

| <b>Content</b>                                                                              | <b>Page</b> |
|---------------------------------------------------------------------------------------------|-------------|
| Proposed EI-MS key fragmentation pathways for ETH-LAD                                       | S3          |
| Proposed EI-MS key fragmentation pathways for 1P-ETH-LAD                                    | S4          |
| Proposed EI-MS fragment ions for <i>m/z</i> 192 and <i>m/z</i> 265 (1P-ETH-LAD)             | S5          |
| GC-MS analysis of ETH-LAD hemitartrate and GC-induced formation of three additional isomers | S6          |
| IR of ETH-LAD hemitartrate                                                                  | S7          |
| GC-sIR of ETH-LAD isomer I                                                                  | S8          |
| GC-sIR of ETH-LAD isomer III                                                                | S9          |
| GC-sIR of ETH-LAD isomer IV                                                                 | S10         |
| Overlaid partial GC-sIR of ETH-LAD isomers I, III and IV                                    | S11         |
| IR of 1P-ETH-LAD hemitartrate                                                               | S12         |
| GC-sIR of 1P-ETH-LAD                                                                        | S13         |
| HPLC-UV (DAD) spectra of ETH-LAD and 1P-ETH-LAD                                             | S14         |
| 1P-ETH-LAD stability in human serum at 37°C and analysis by LC-ESI-Q-MS                     | S15–S17     |
| <sup>1</sup> H NMR ETH-LAD hemitartrate                                                     | S18–S20     |
| <sup>13</sup> C NMR of ETH-LAD hemitartrate                                                 | S21         |
| HSQC of ETH-LAD hemitartrate                                                                | S22–S24     |
| HMBC of ETH-LAD hemitartrate                                                                | S25–S31     |
| <sup>1</sup> H NMR 1P-ETH-LAD hemitartrate                                                  | S32–S34     |
| <sup>13</sup> C NMR of 1P-ETH-LAD hemitartrate                                              | S35         |
| HSQC of 1P-ETH-LAD hemitartrate                                                             | S36–S38     |
| HMBC of 1P-ETH-LAD hemitartrate                                                             | S39–S42     |

Drug Testing and Analysis – Brandt *et al.* – Supporting Information

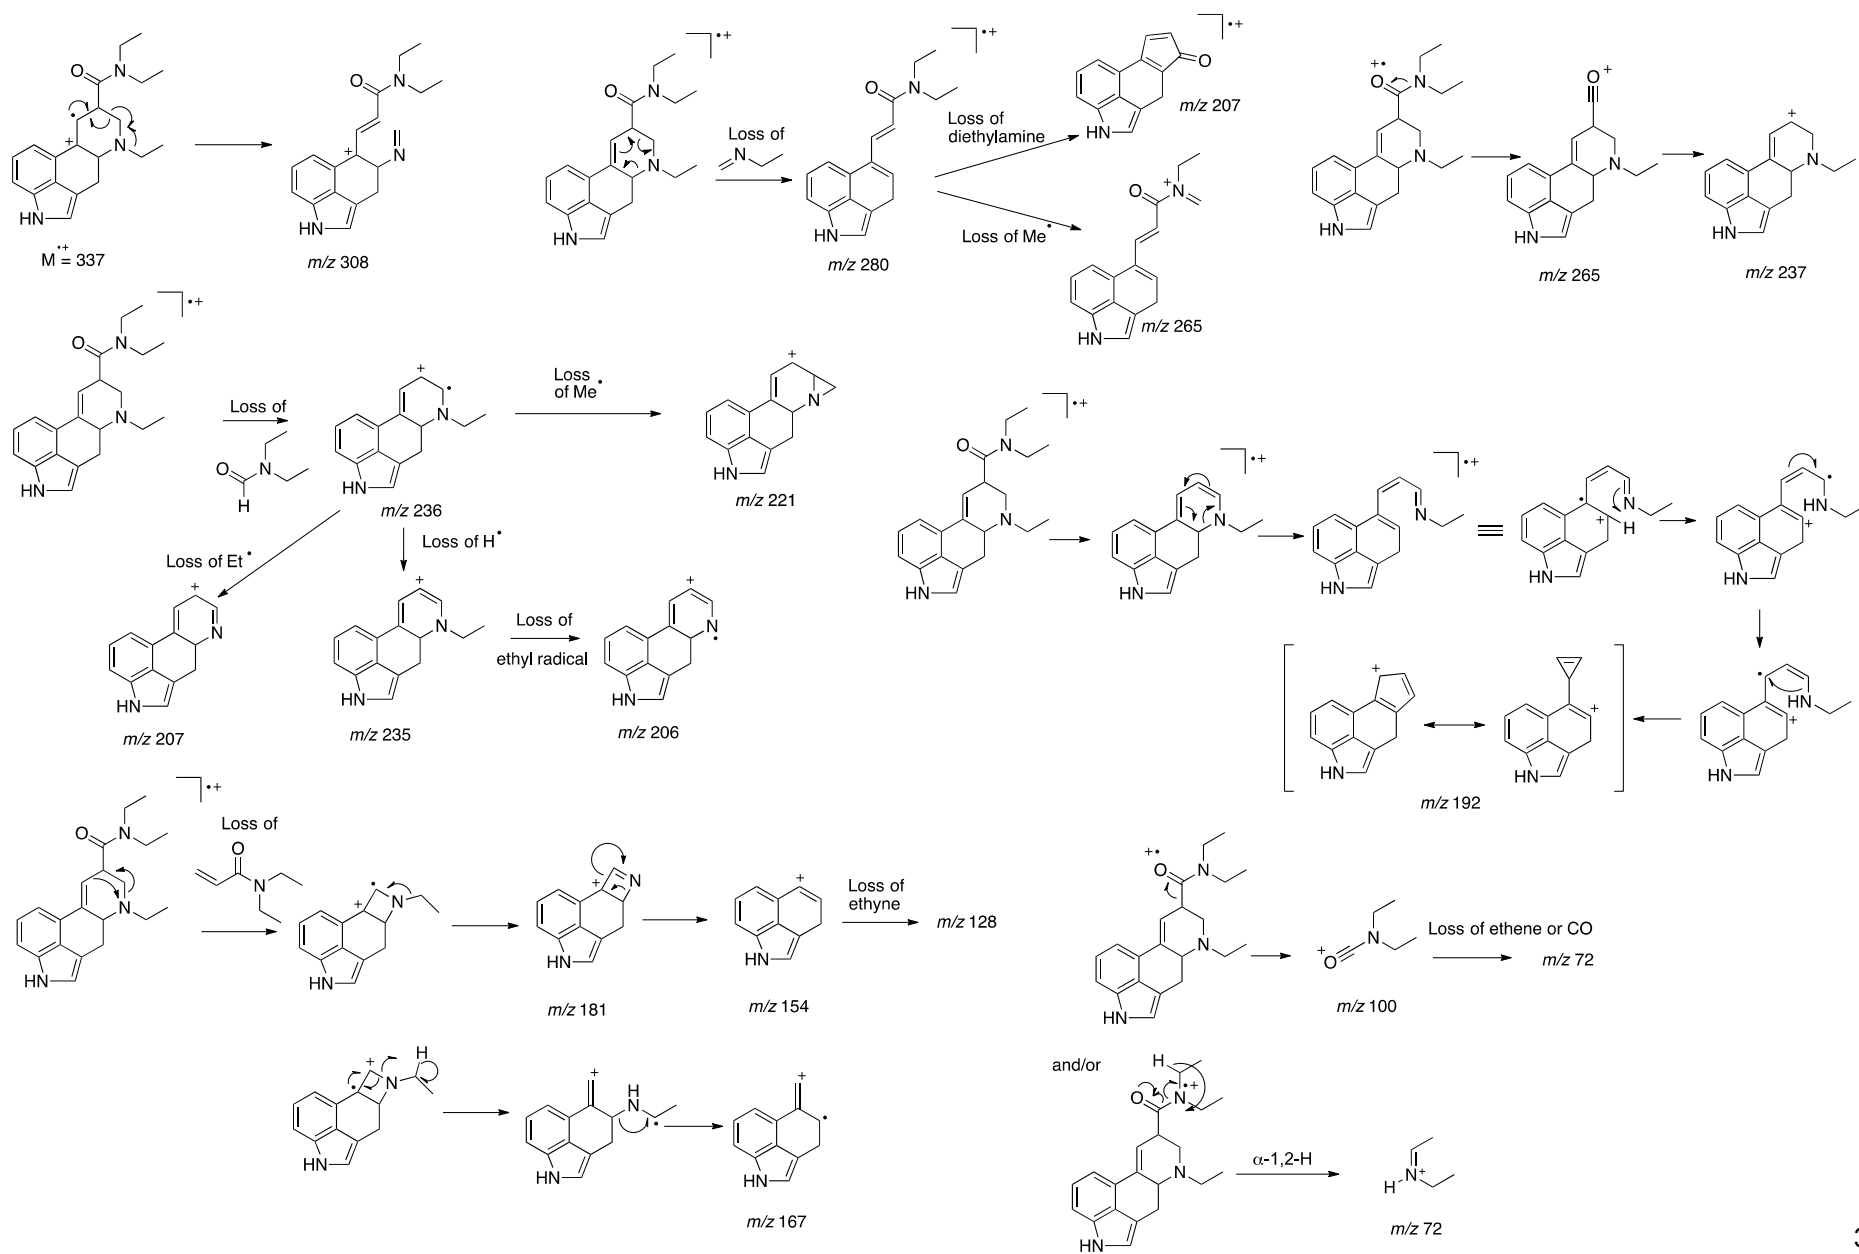

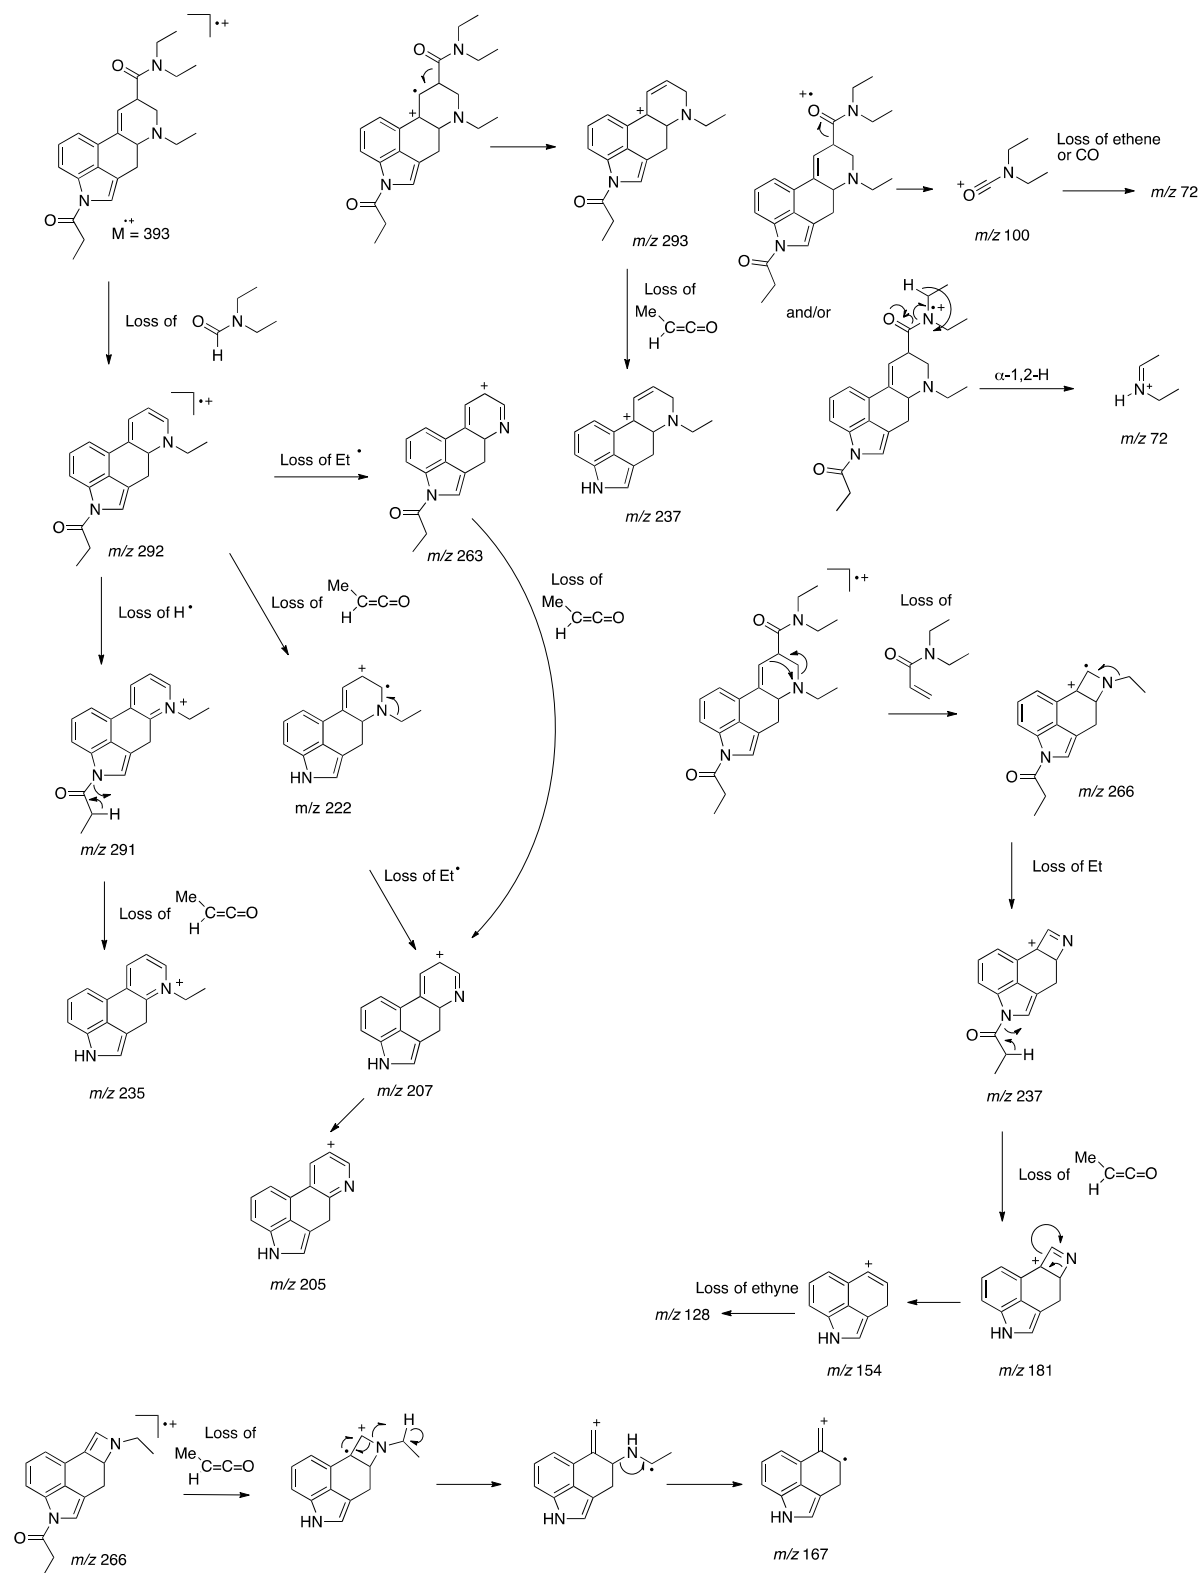



Drug Testing and Analysis – Brandt *et al.* – Supporting Information

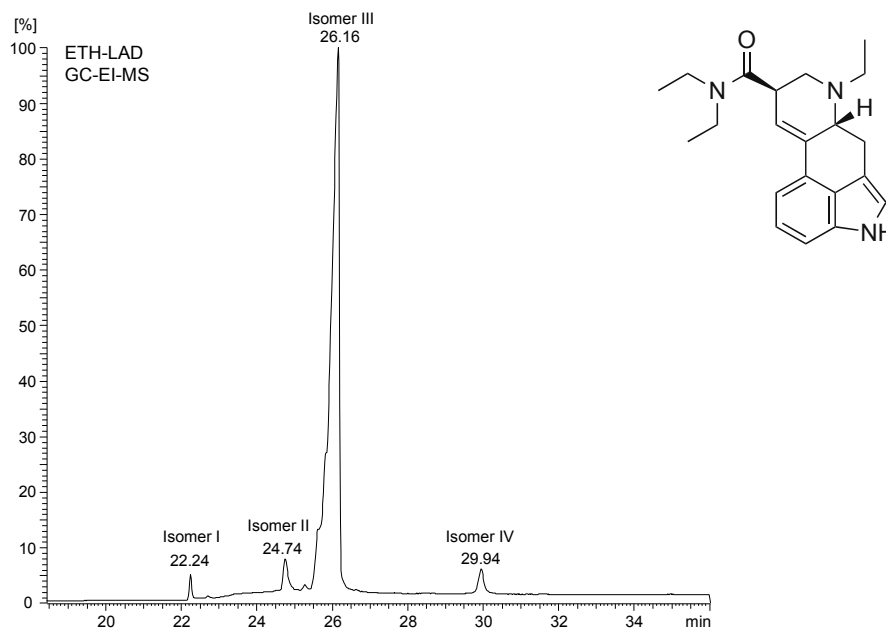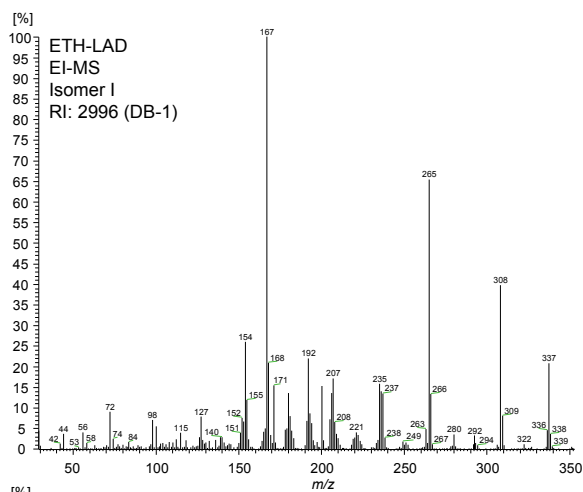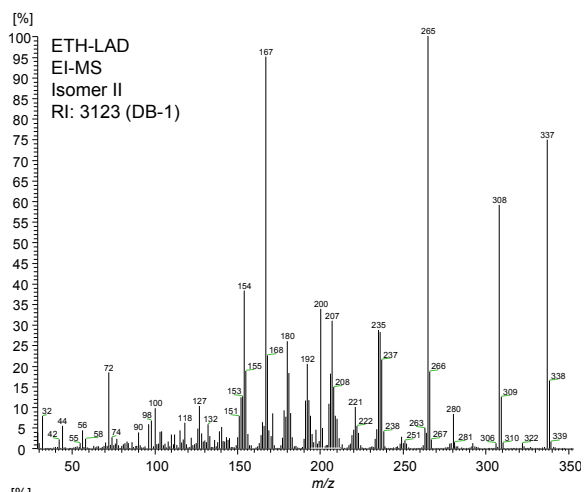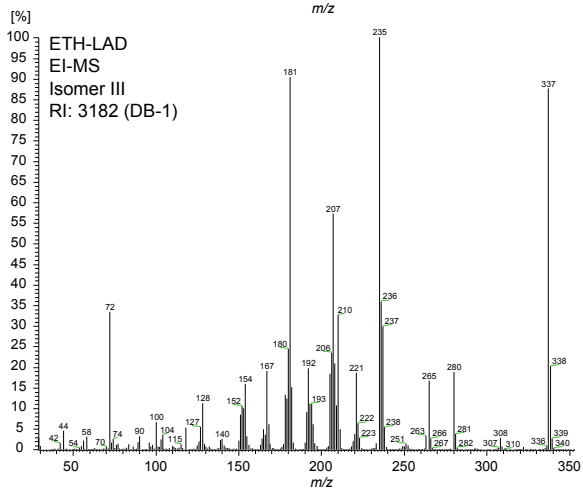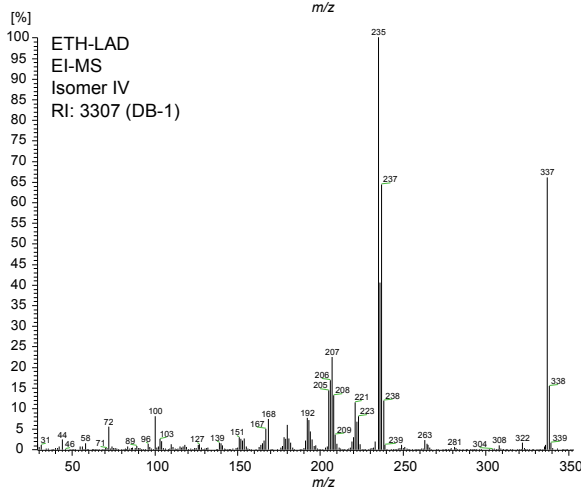

Drug Testing and Analysis – Brandt *et al.* – Supporting Information

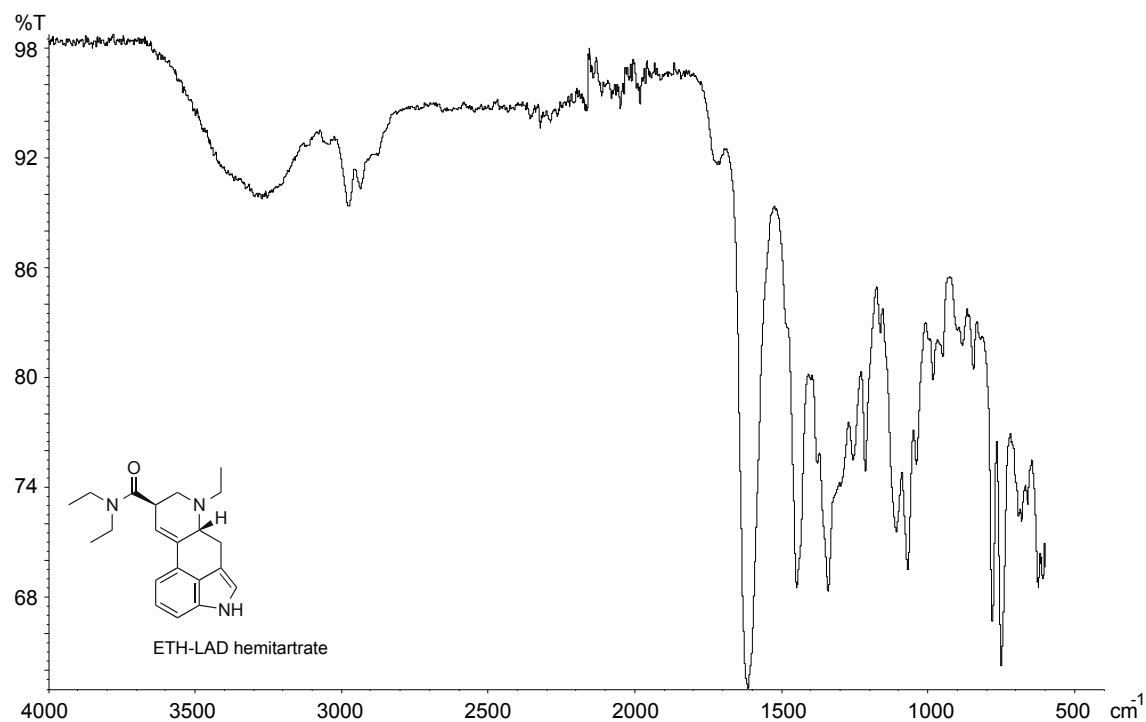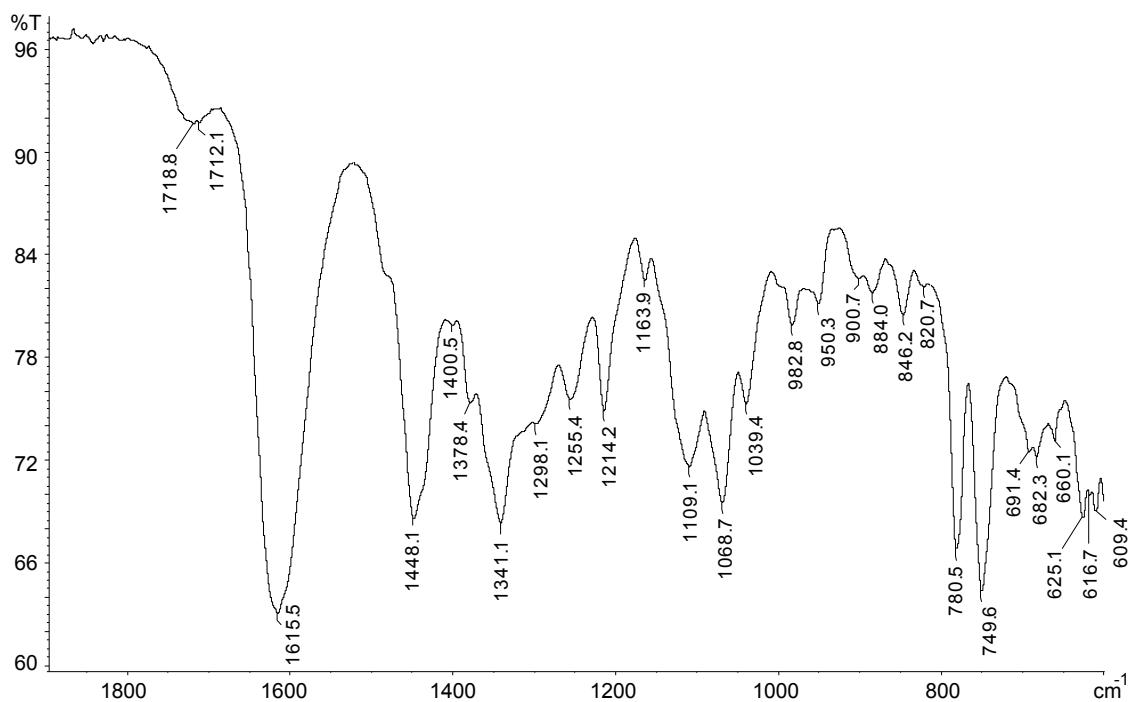

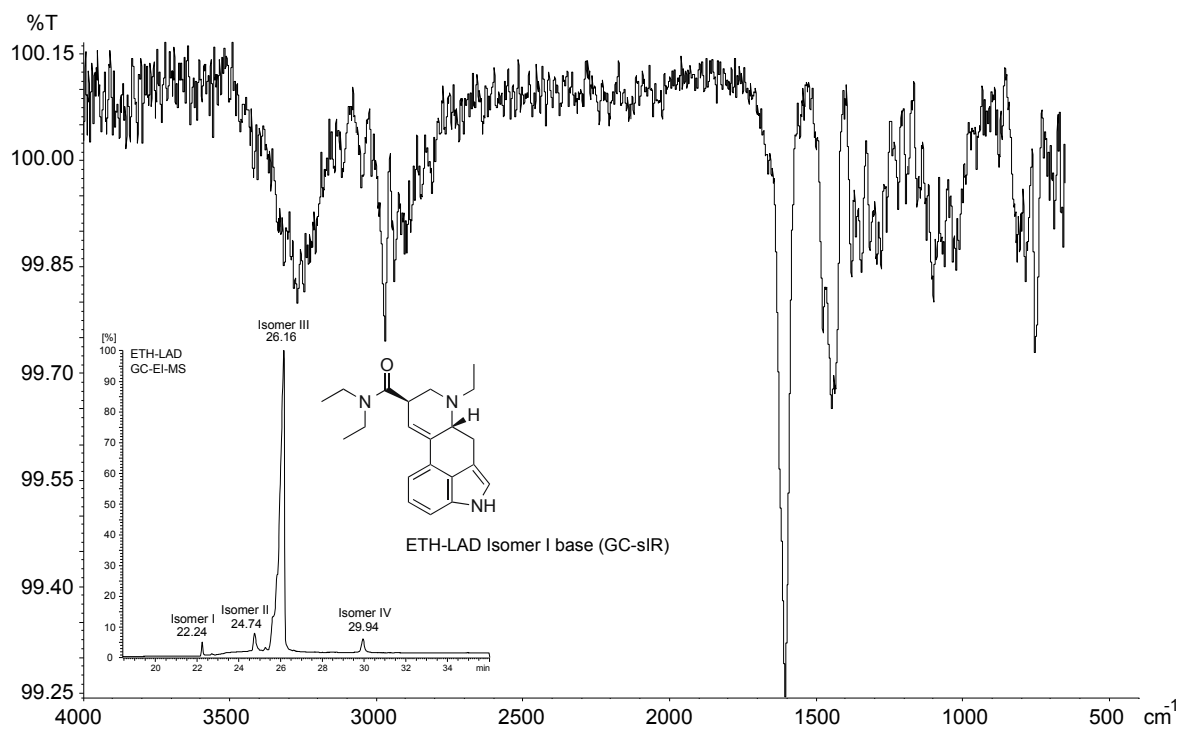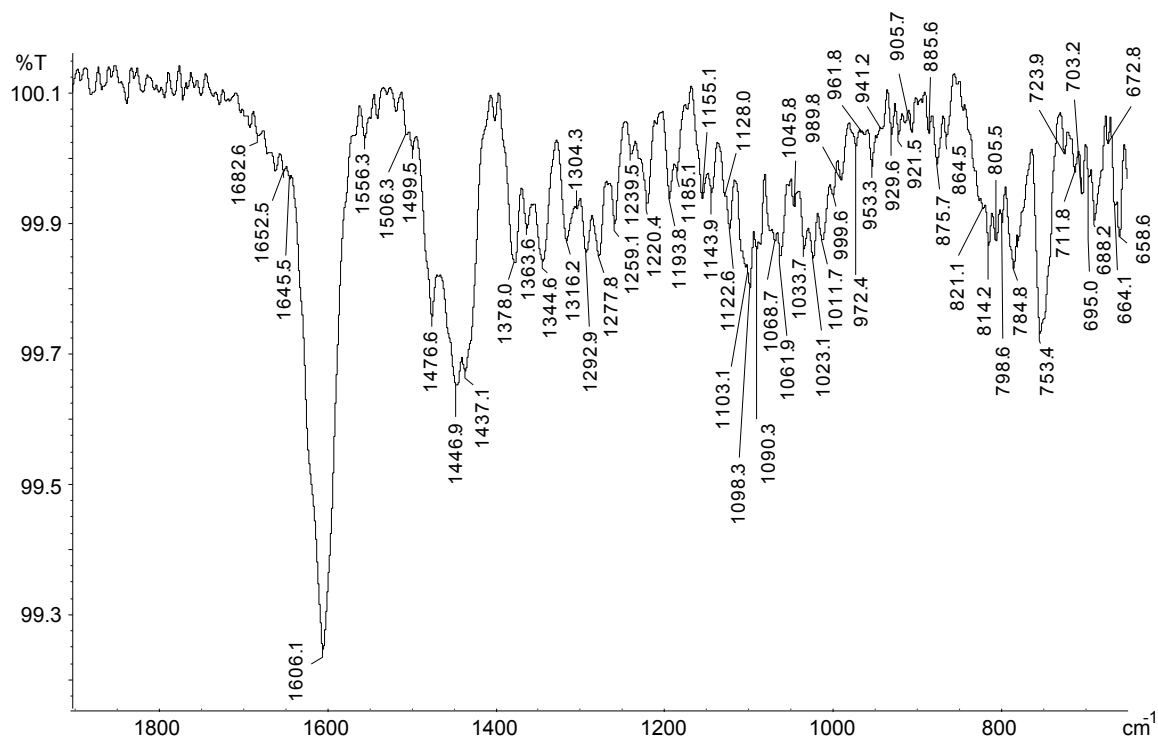



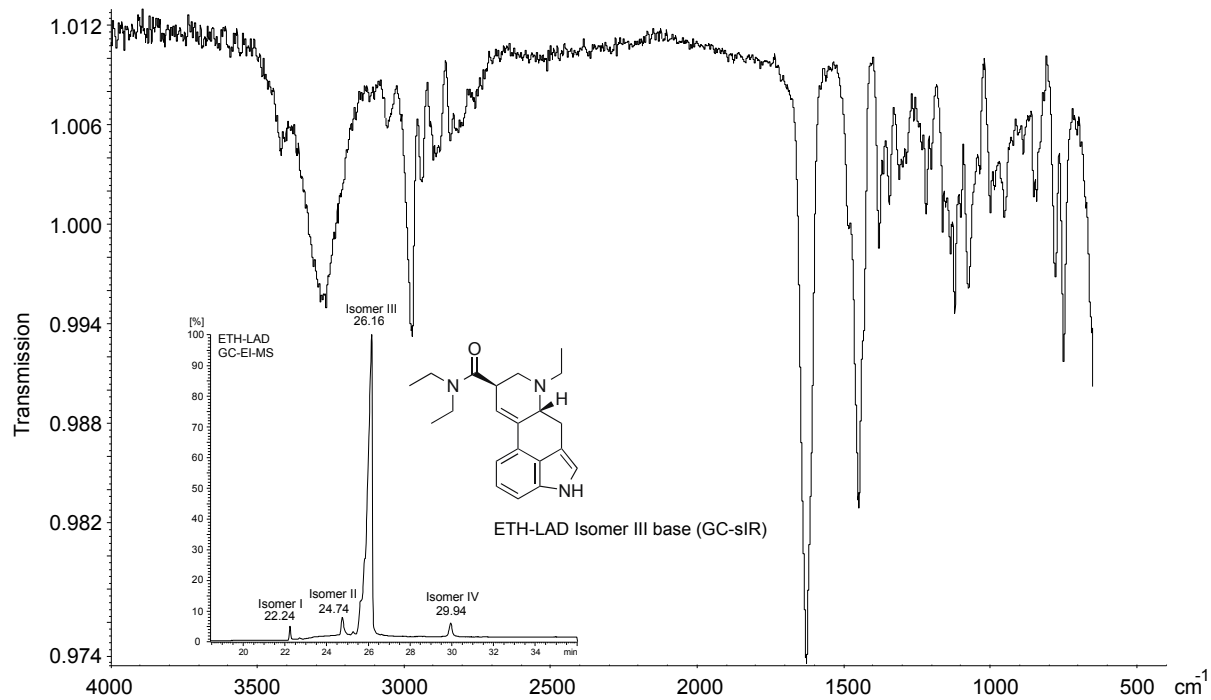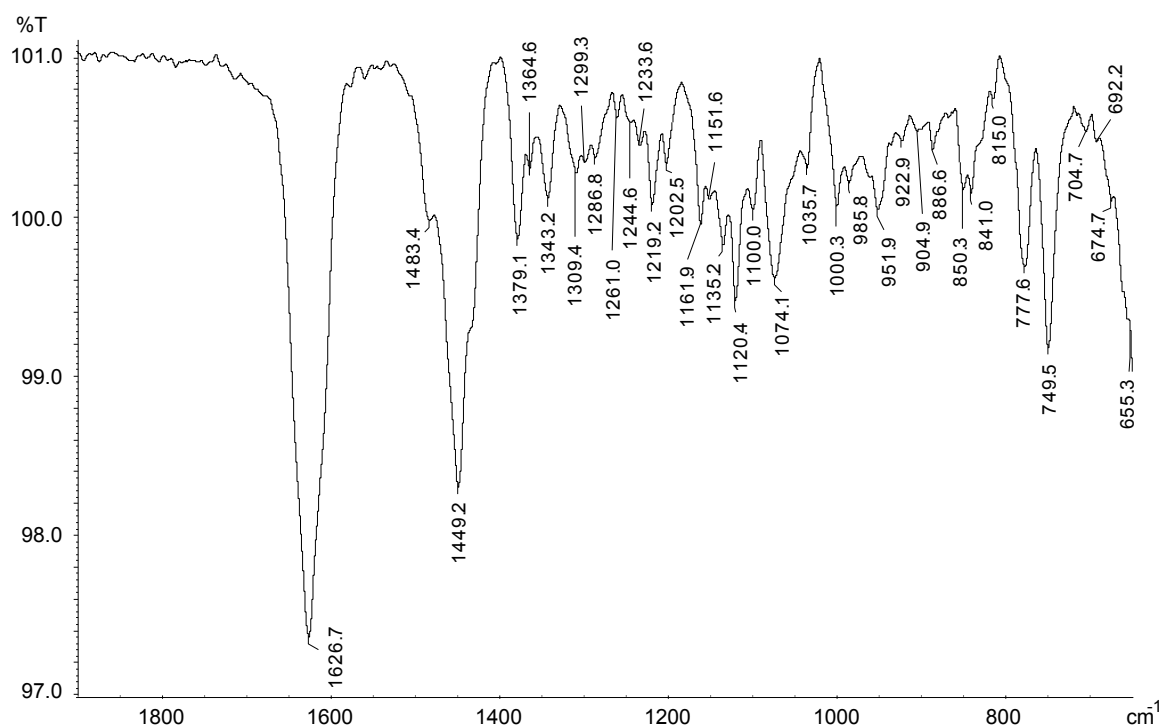

Drug Testing and Analysis – Brandt *et al.* – Supporting Information

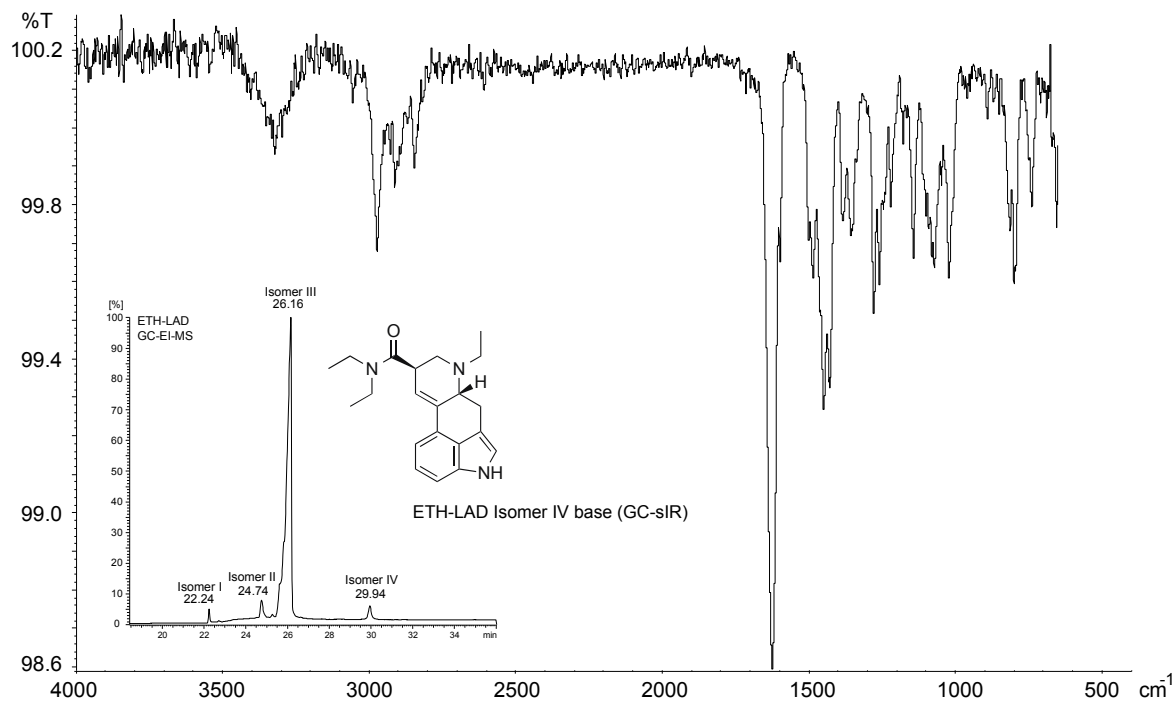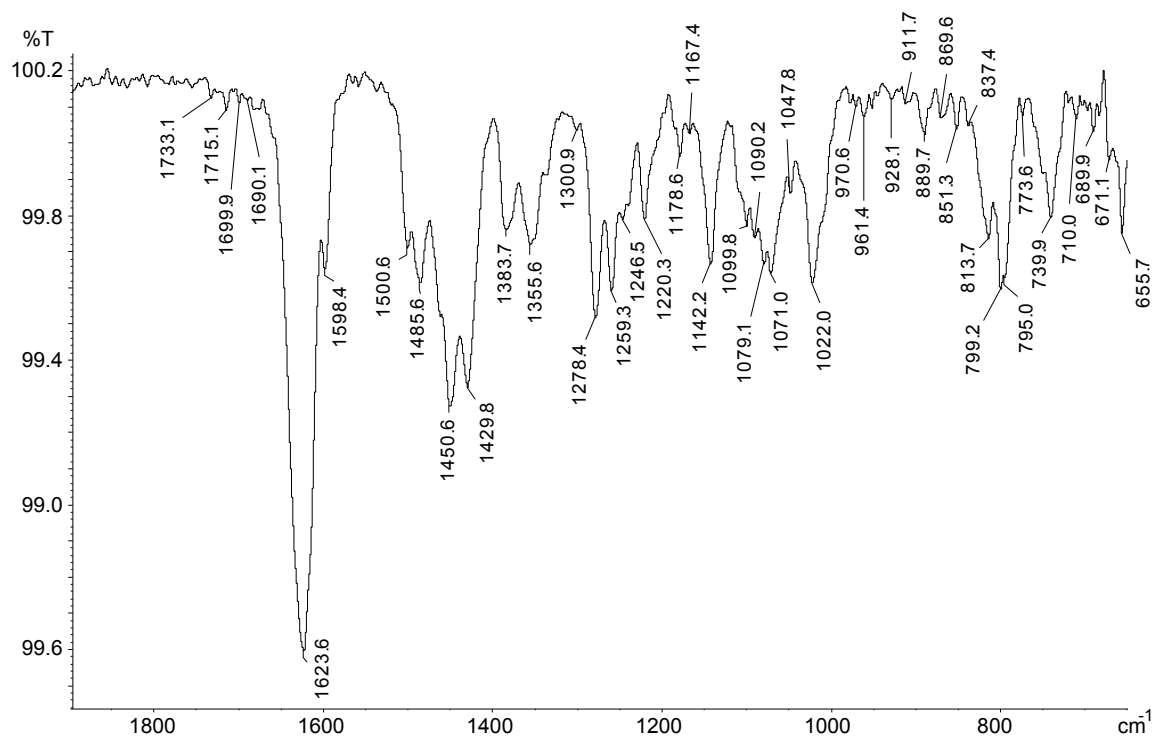

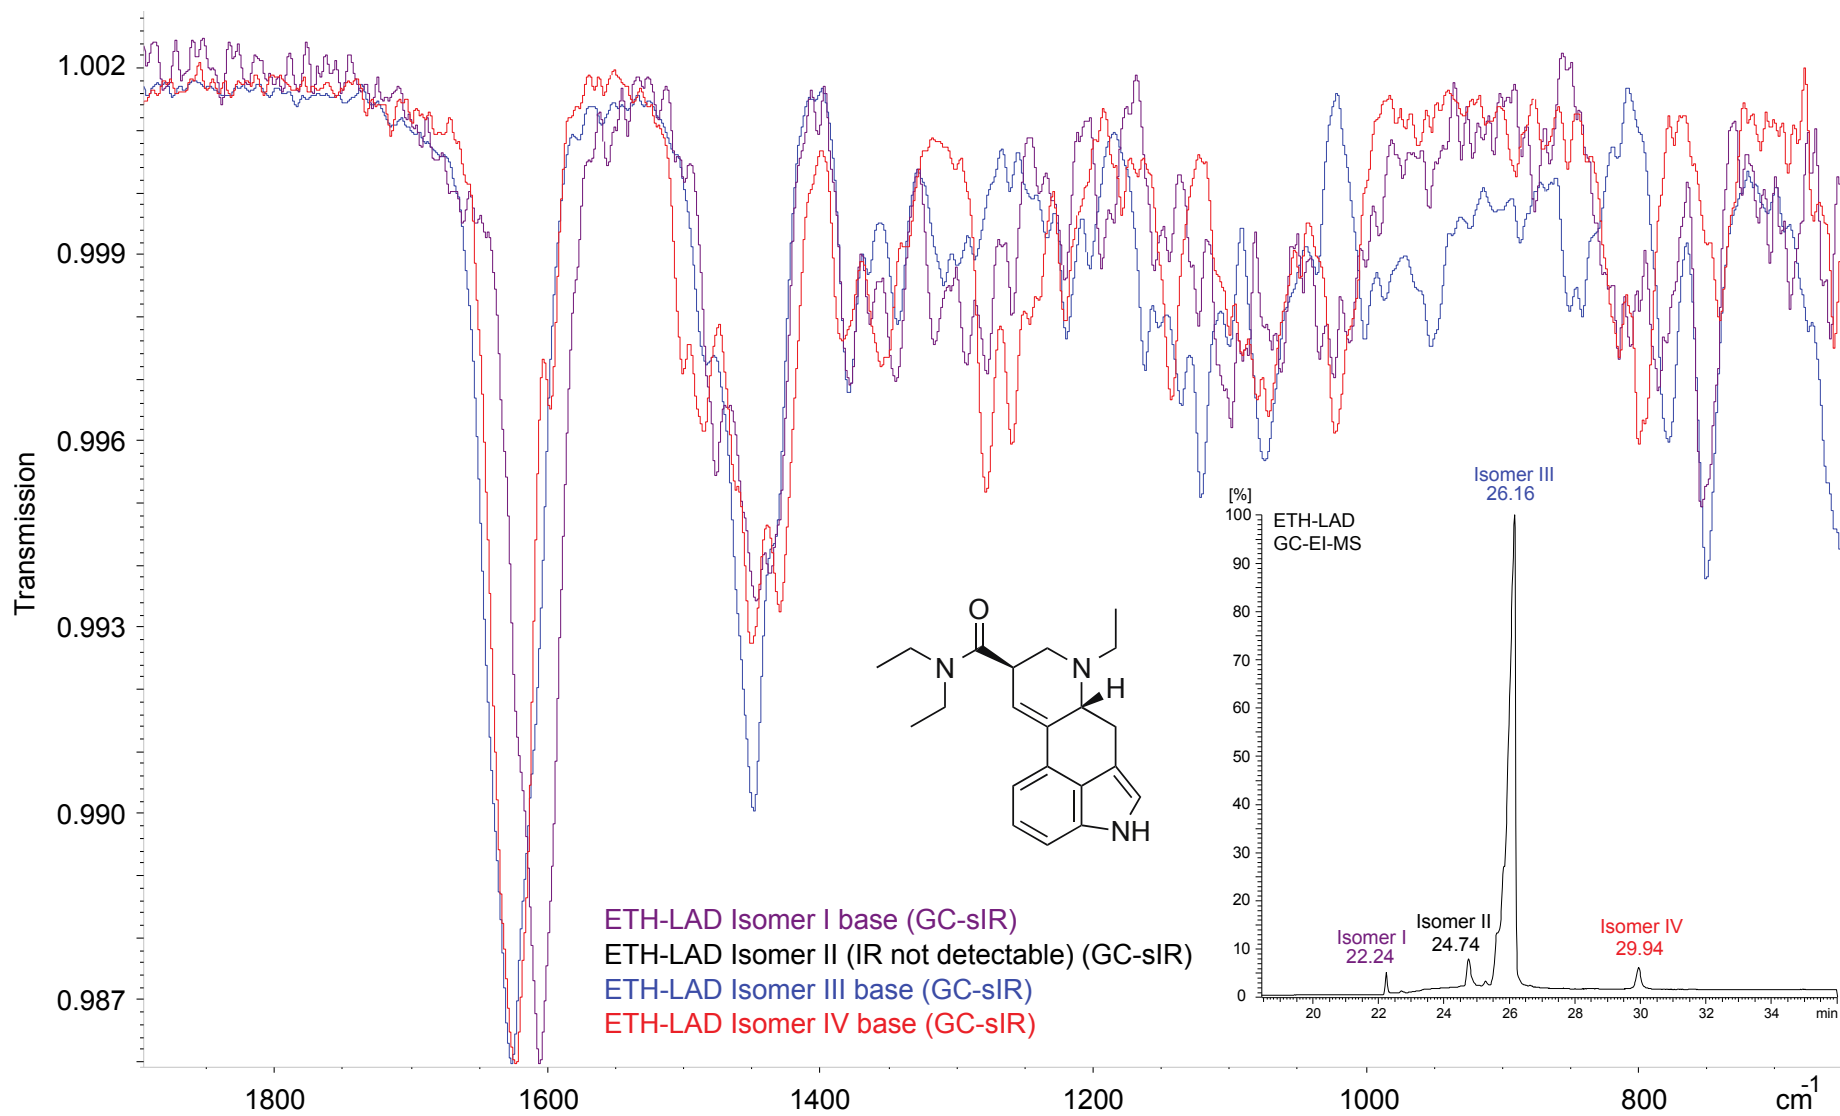

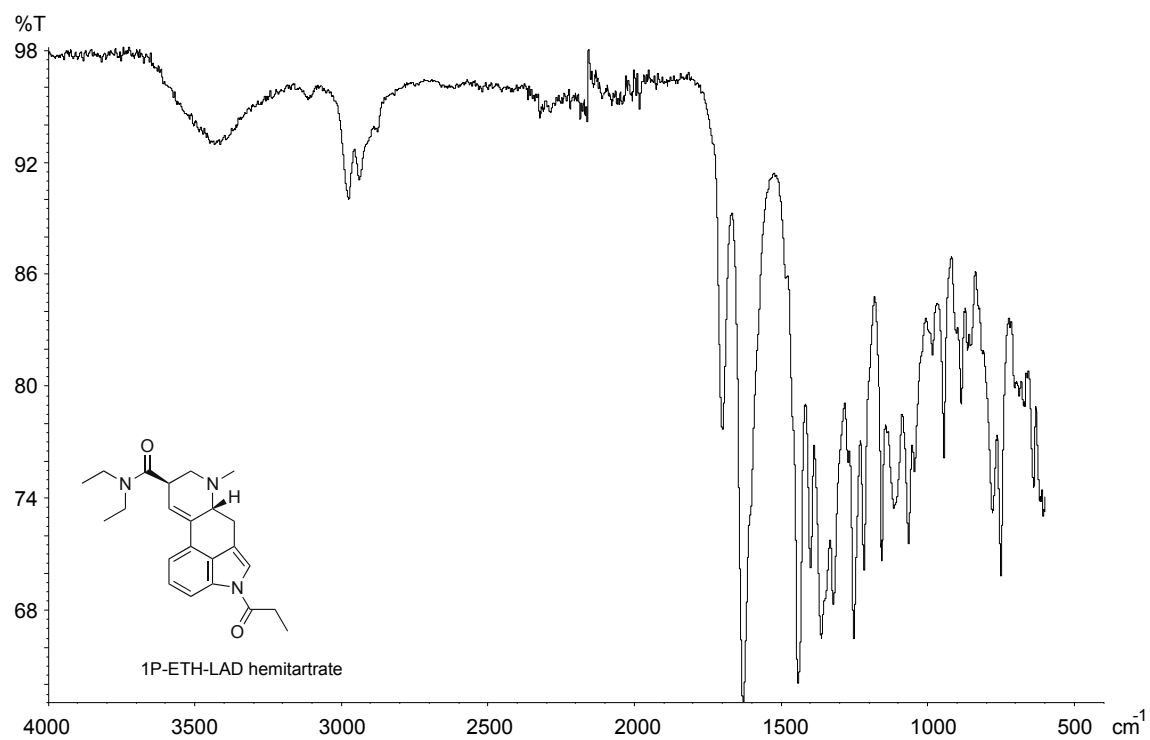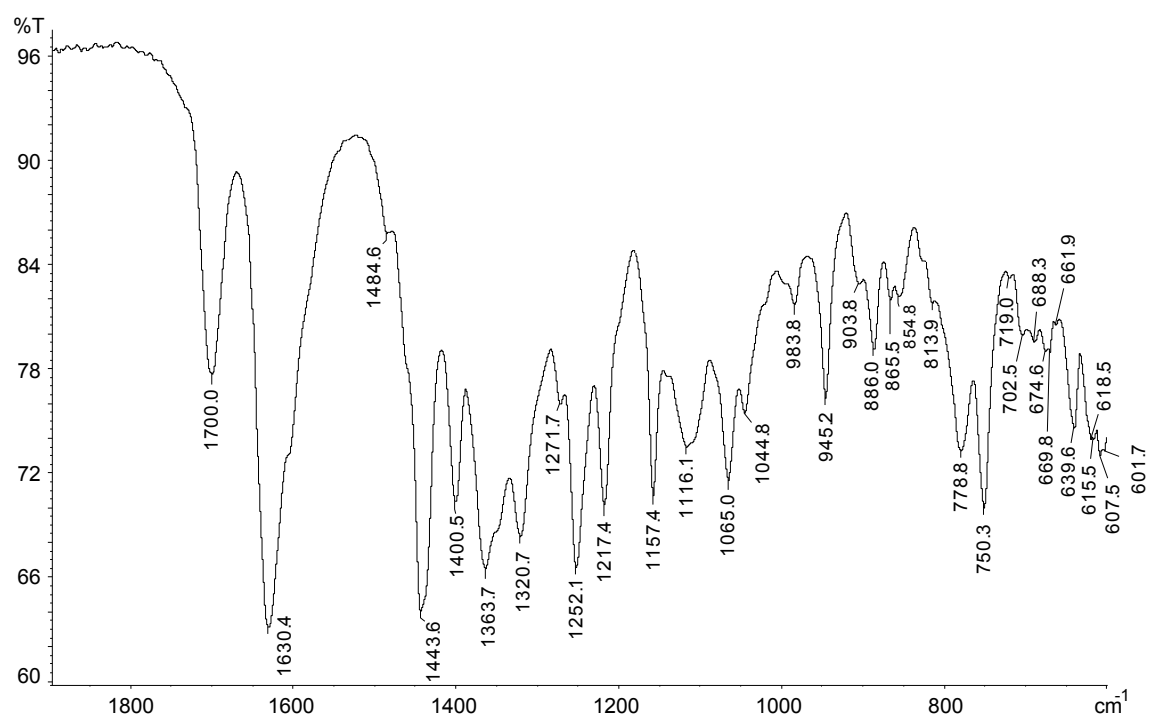

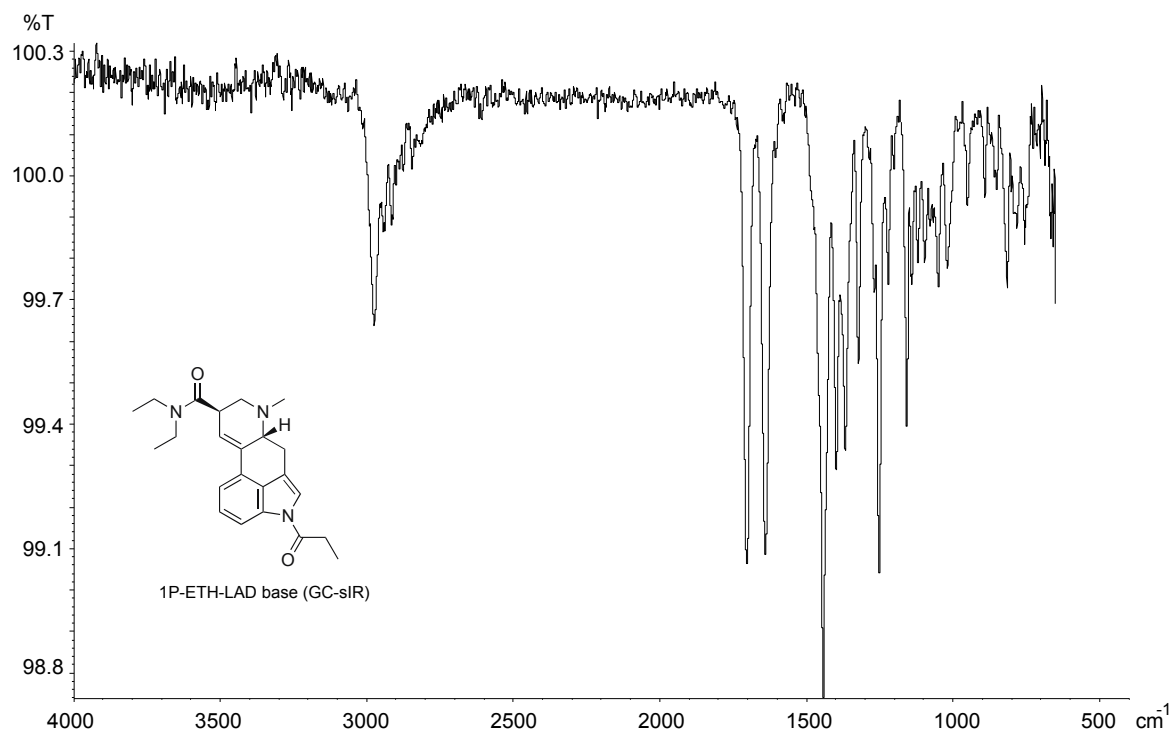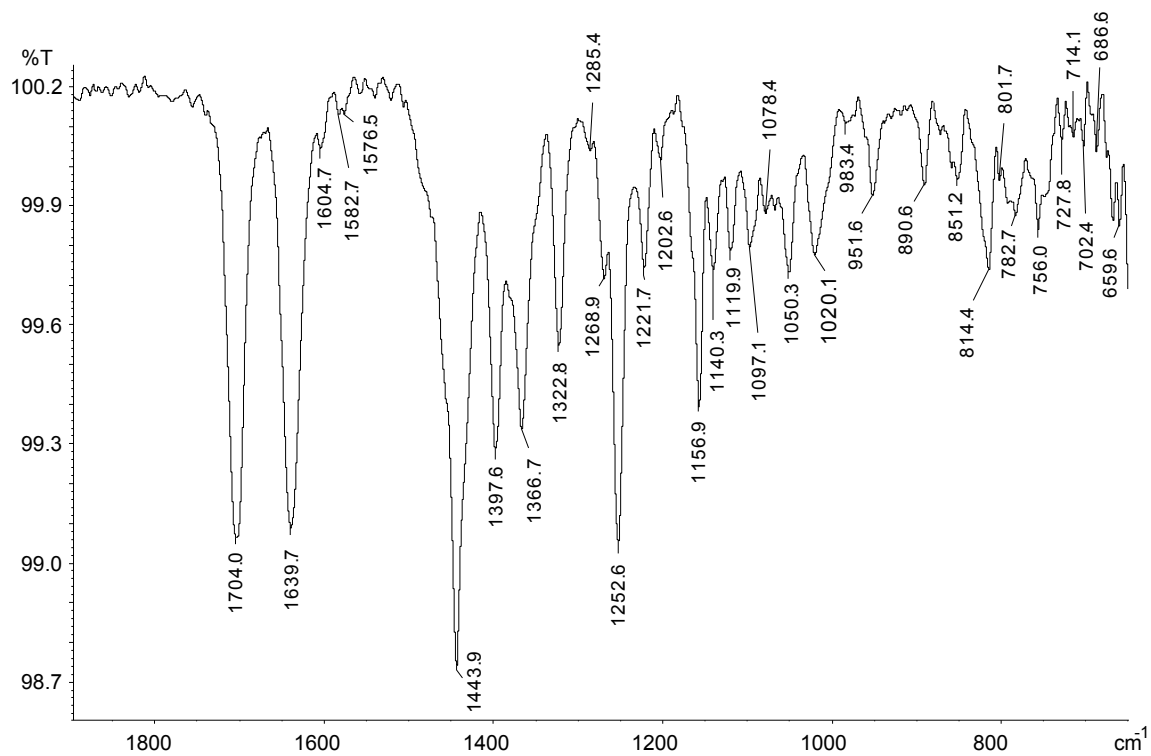

*Liquid chromatography diode array detection*

A Dionex 3000 Ultimate liquid chromatography system coupled to a UV diode array detector (Thermo Fisher, St. Albans, UK) was used for analysis using a Phenomenex Synergi Fusion column (150 mm × 2 mm, 4 μm) that was protected by a 4 mm × 3 mm Phenomenex Synergi Fusion guard column (Phenomenex, Cheshire, UK). The Mobile phases were 70% acetonitrile with 25 mM of triethylammonium phosphate buffer (TEAP) and aqueous TEAP (25 mM) buffer. The gradient elution commenced with 4% acetonitrile and ramped to 70% acetonitrile in 15 min and held for 3 min, resulting in a total acquisition time of 18 min at a flow rate of 0.6 mL/min. The diode array detection window was set at 200 nm–595 nm (collection rate 2 Hz).

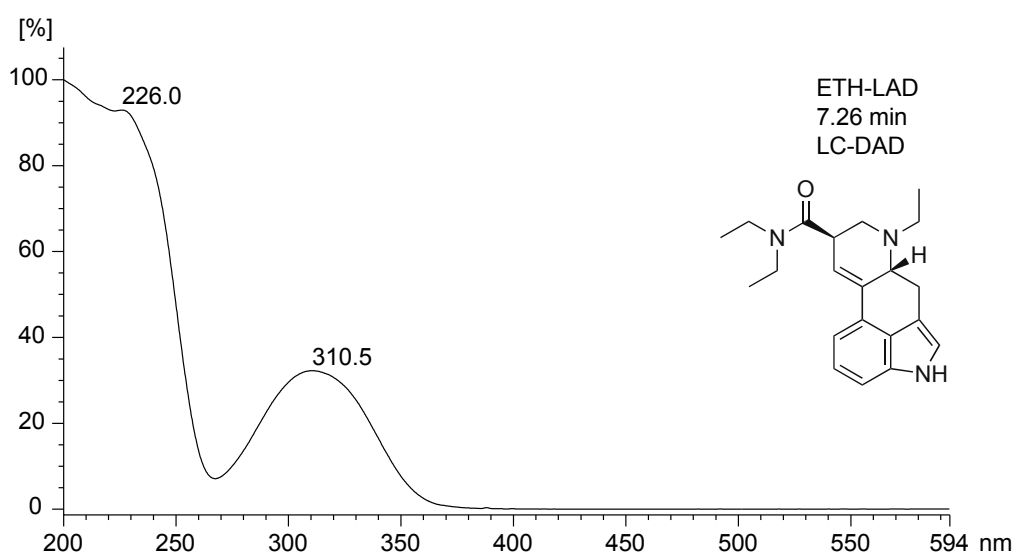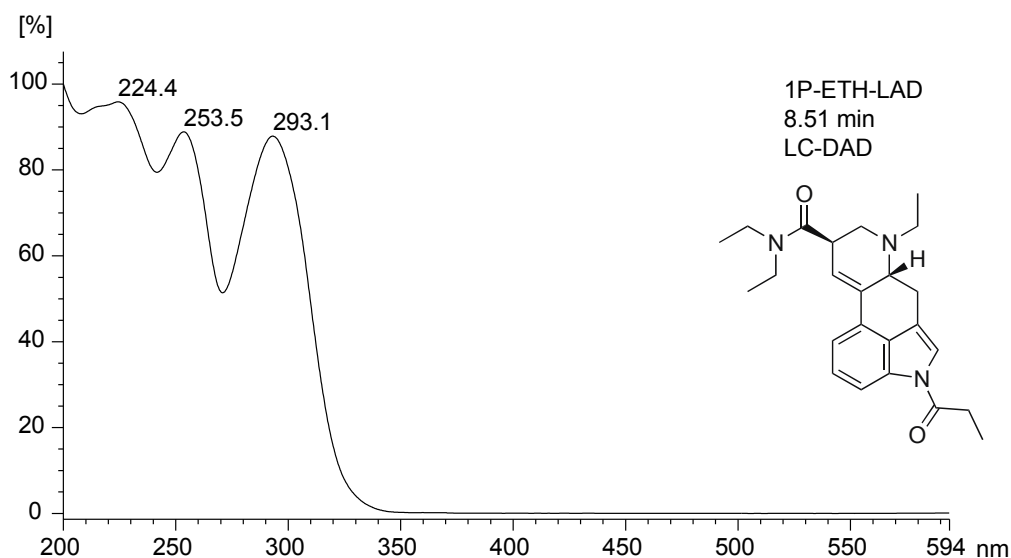

1P-ETH-LAD incubation (10 µg/mL) in human serum at 37°C.

Fifty µL and 950 µL (acetonitrile/water, 1/1 + 0.1 % formic acid); centrifuged at 18,000 rpm for 3 min, then passed through a Nylon spin filter (0.2 µm). Samples were further diluted for LC-MS: 50 µL of the above and 950 µL (acetonitrile /water, 1/1 + 0.1 % formic acid).

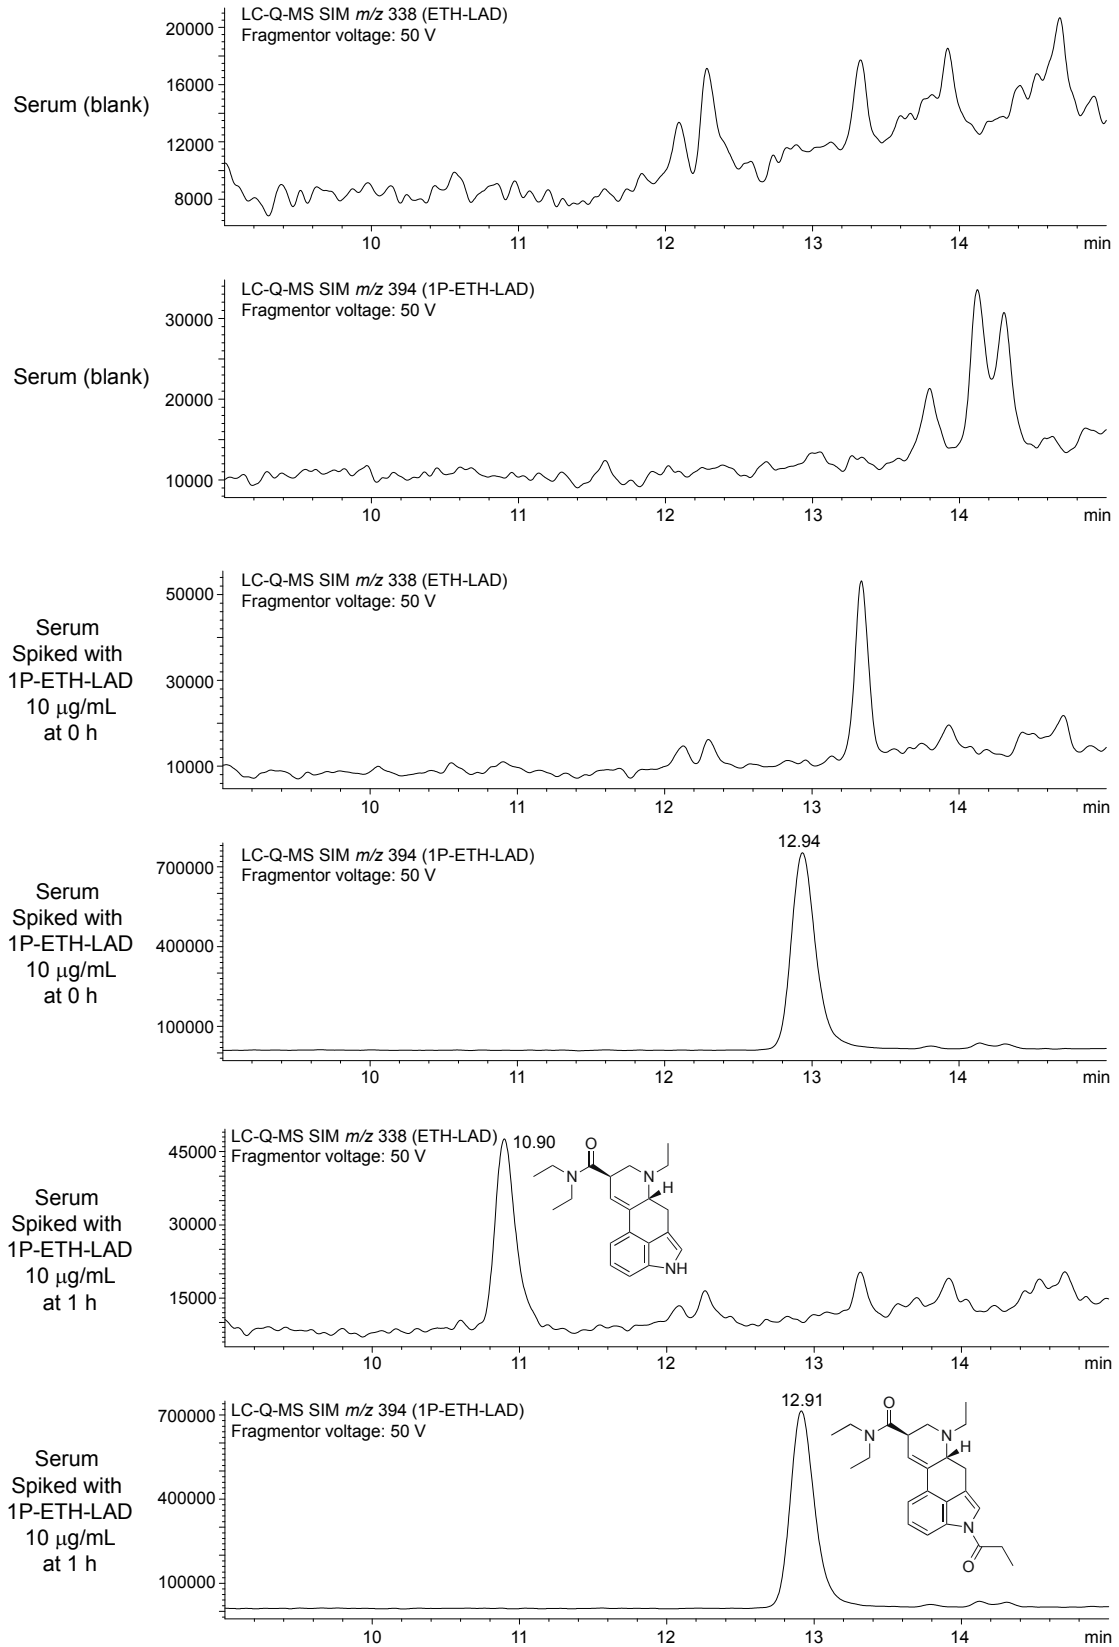

Drug Testing and Analysis – Brandt *et al.* – Supporting Information

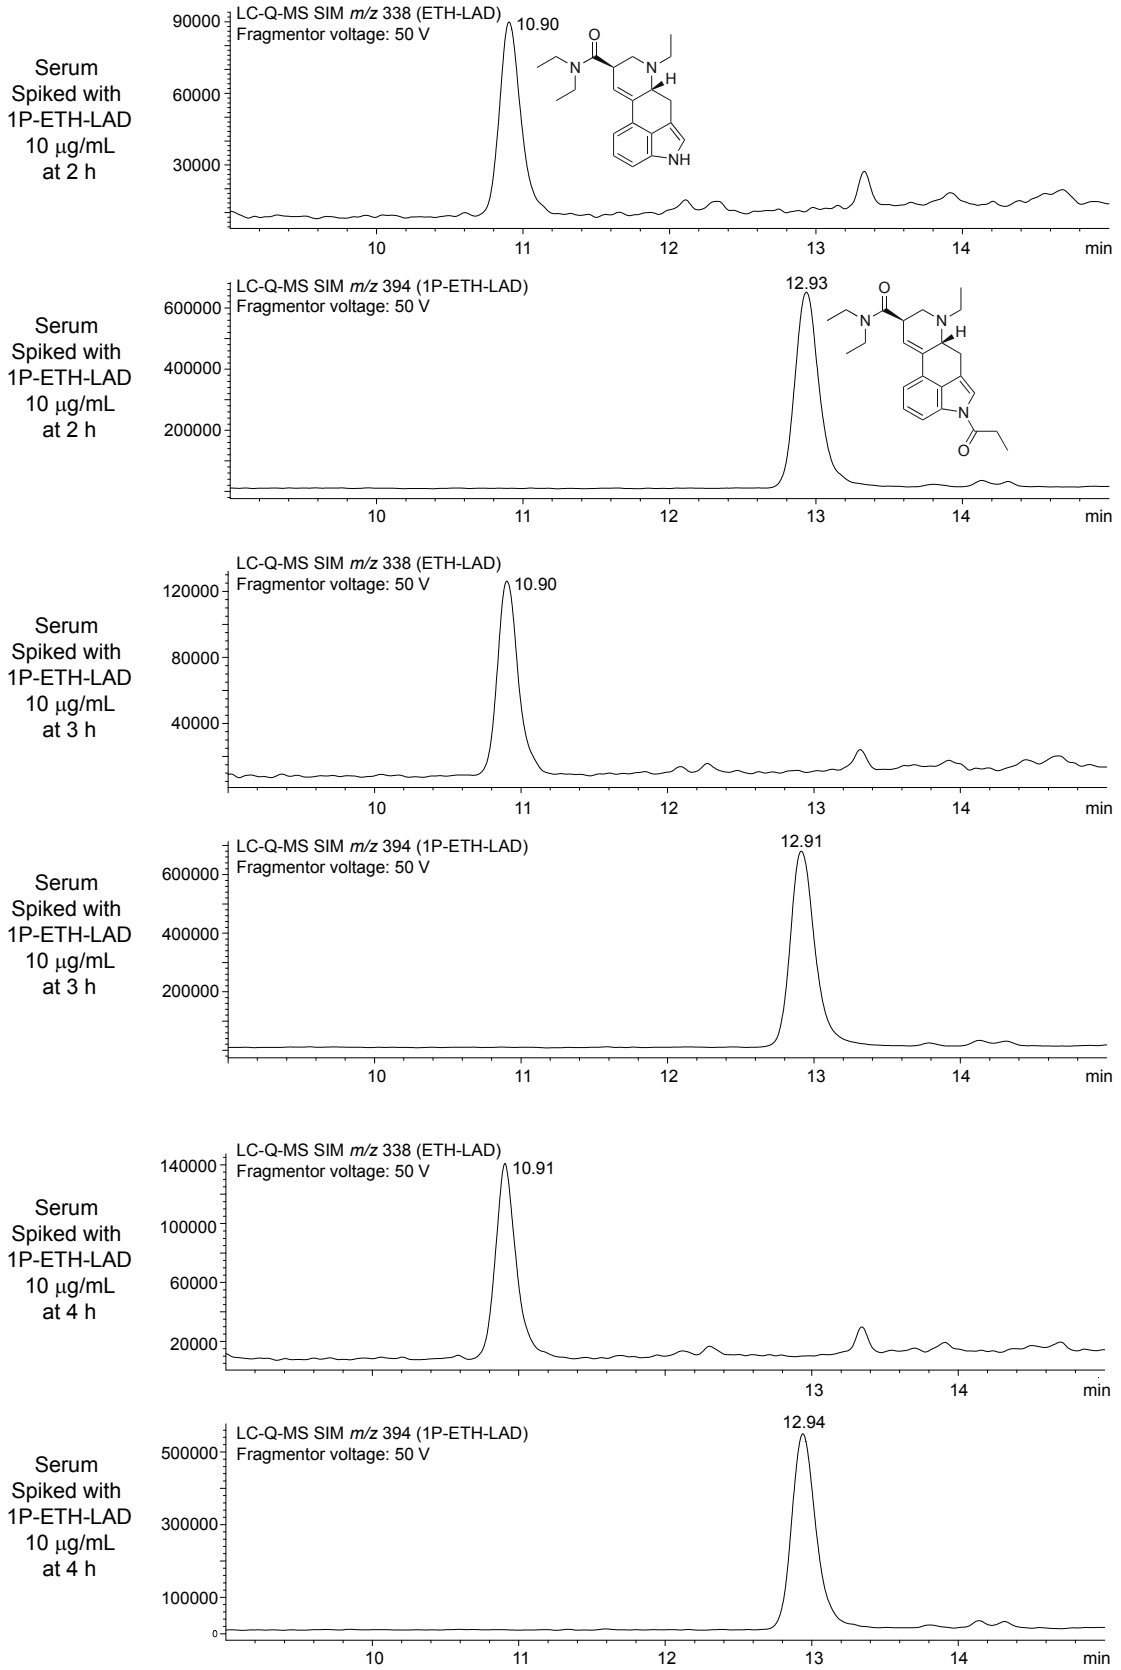



Drug Testing and Analysis – Brandt *et al.* – Supporting Information

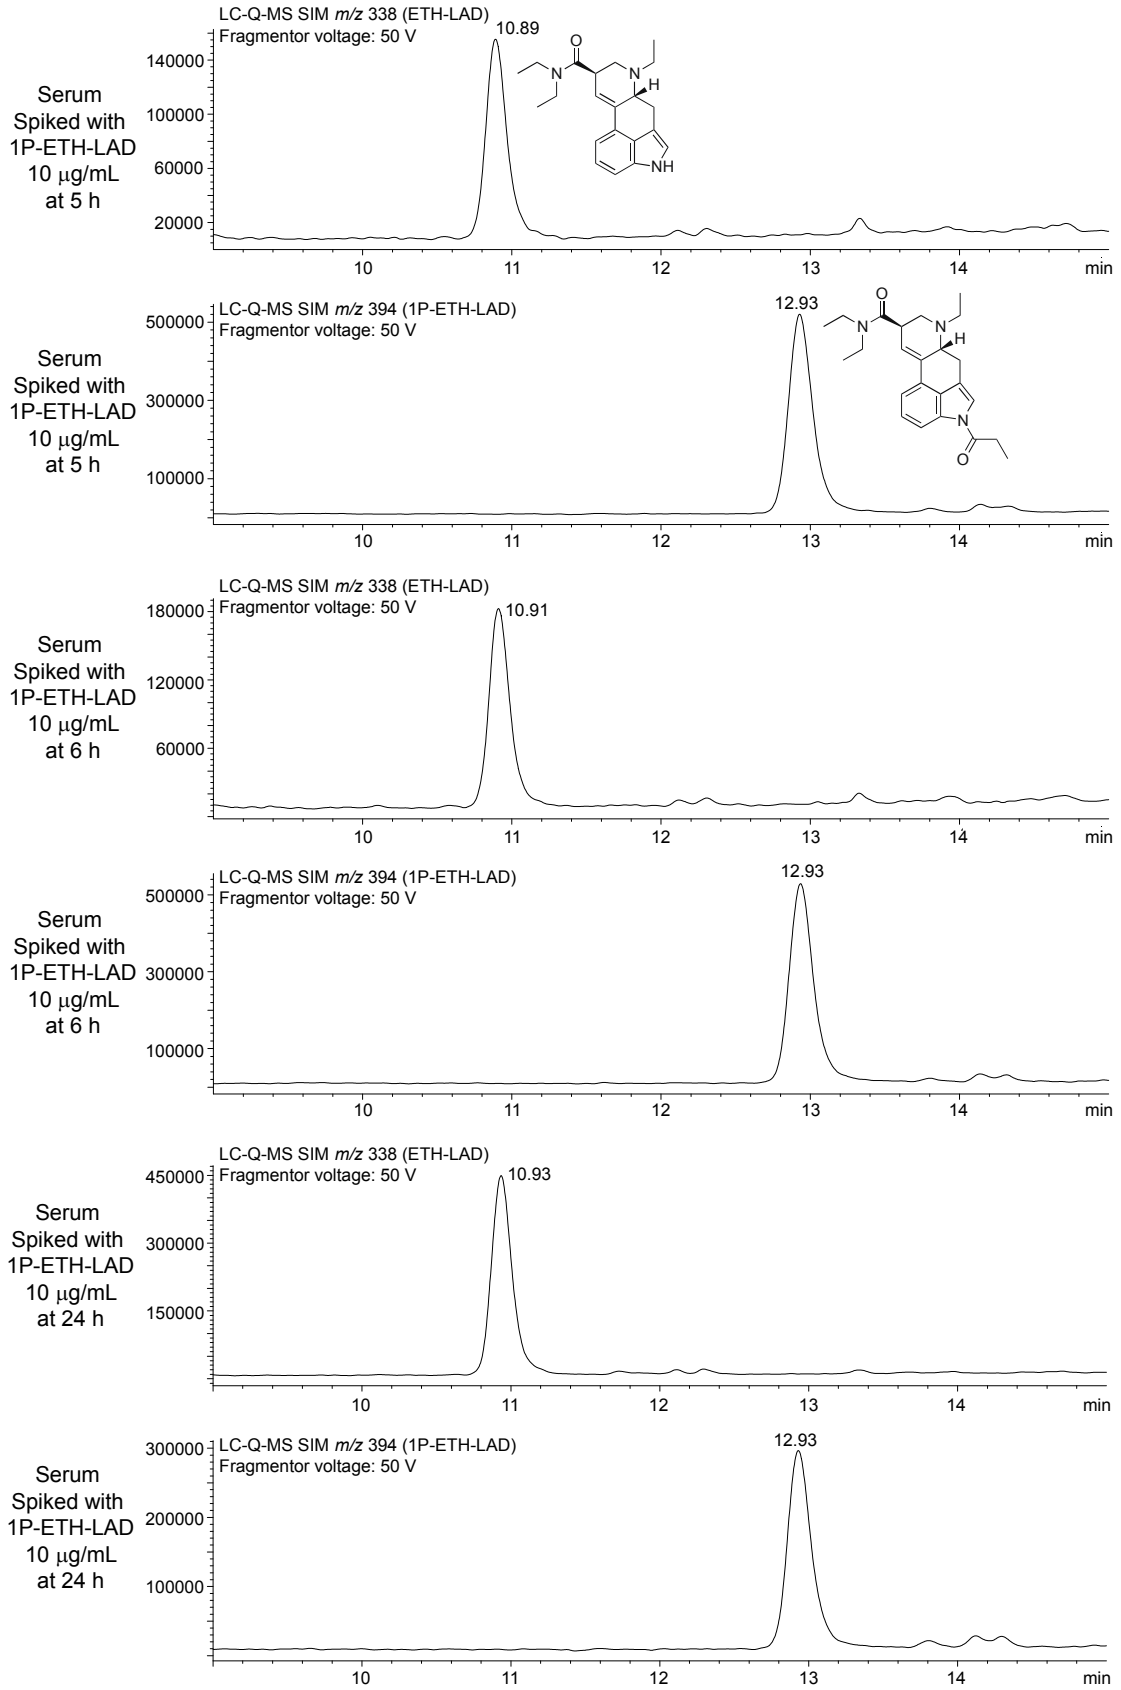

Drug Testing and Analysis – Brandt *et al.* – Supporting Information

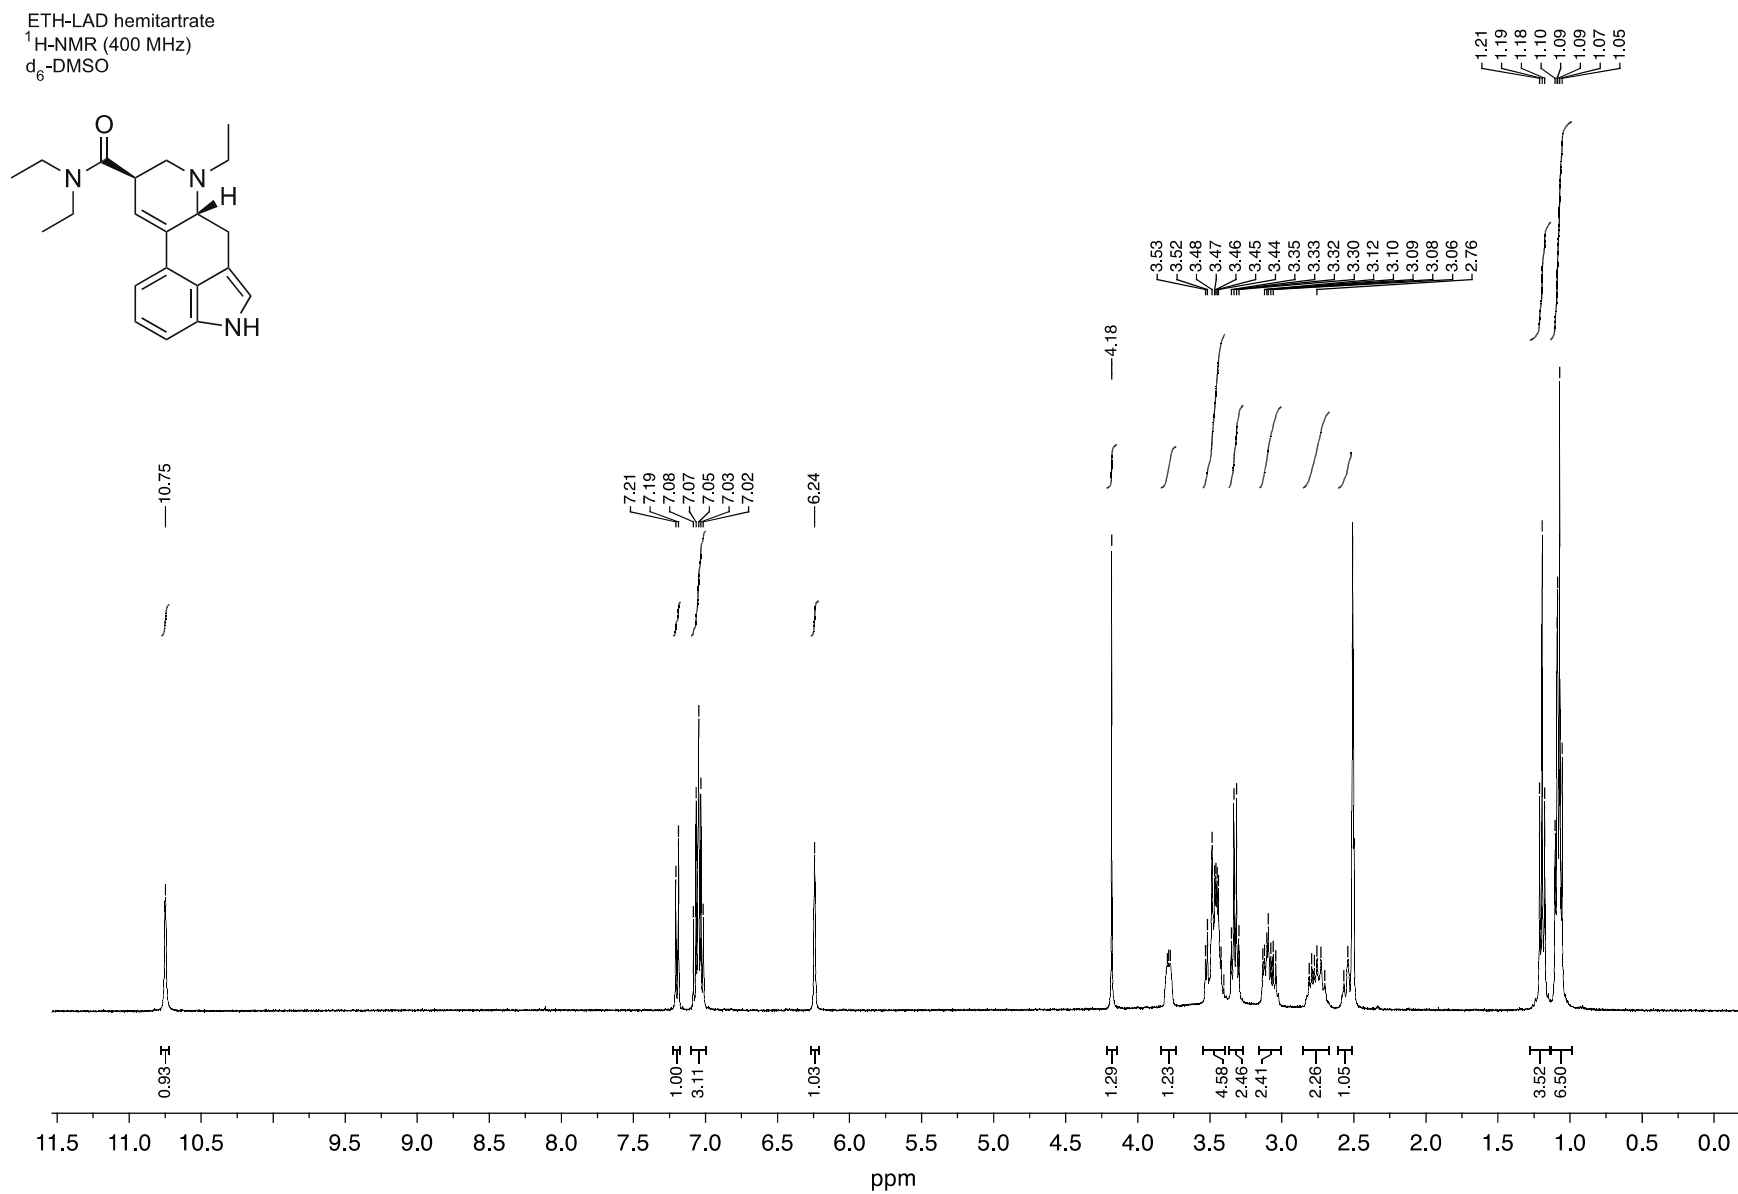

Drug Testing and Analysis – Brandt *et al.* – Supporting Information

ETH-LAD hemitartrate  
<sup>1</sup>H-NMR (400 MHz)  
 d<sub>6</sub>-DMSO

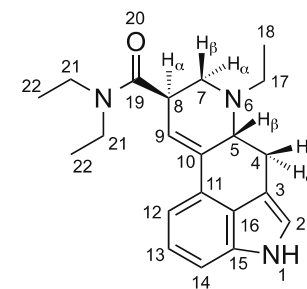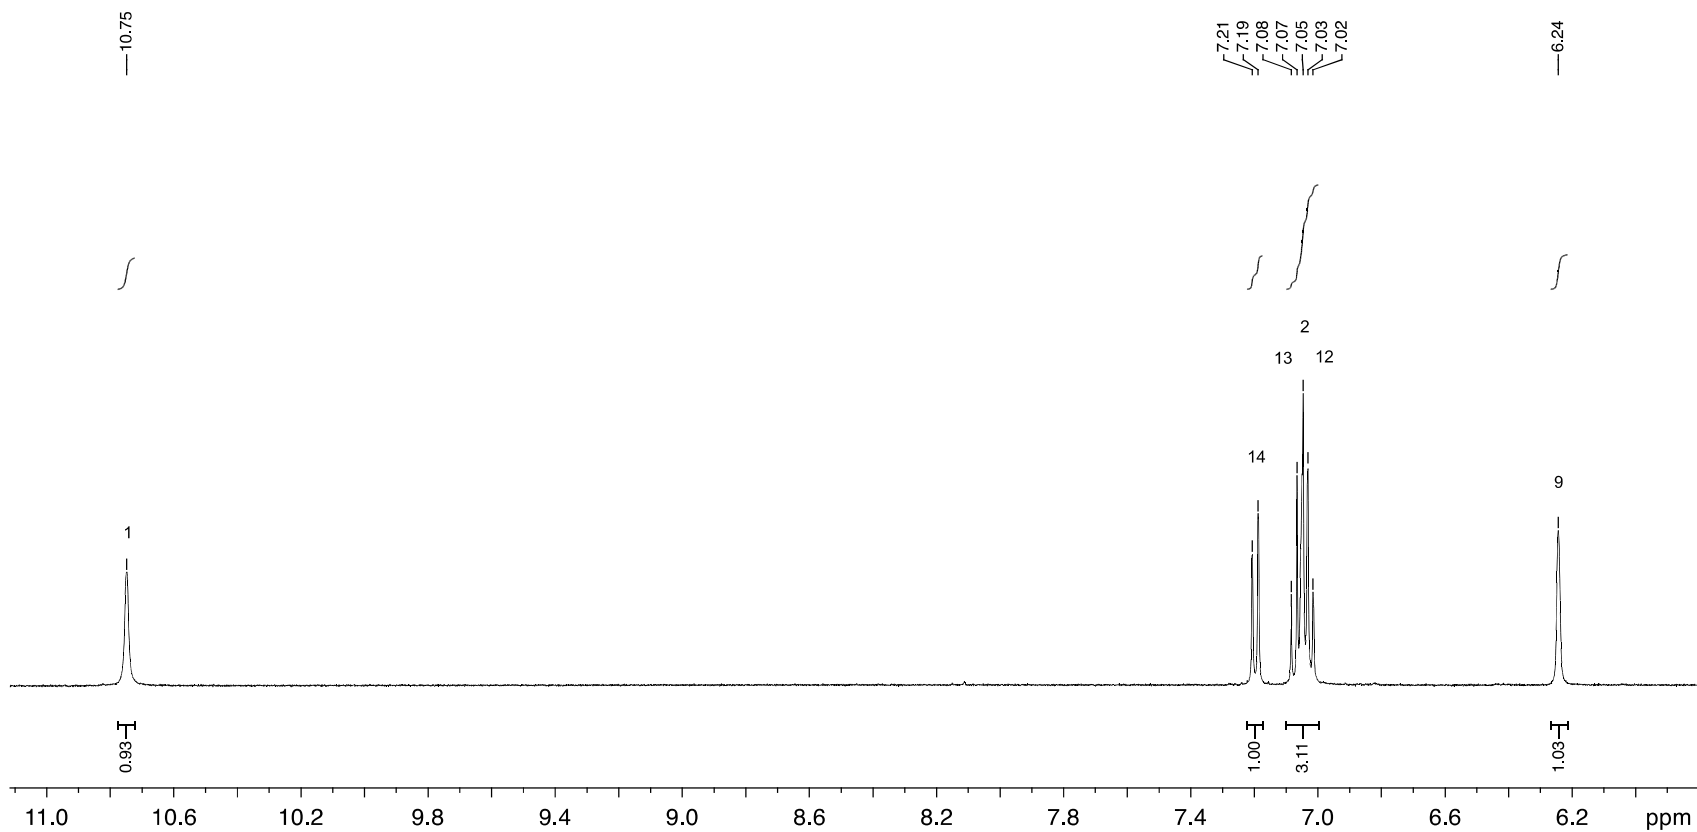

Drug Testing and Analysis – Brandt *et al.* – Supporting Information

ETH-LAD hemitartrate  
<sup>1</sup>H-NMR (400 MHz)  
d<sub>6</sub>-DMSO

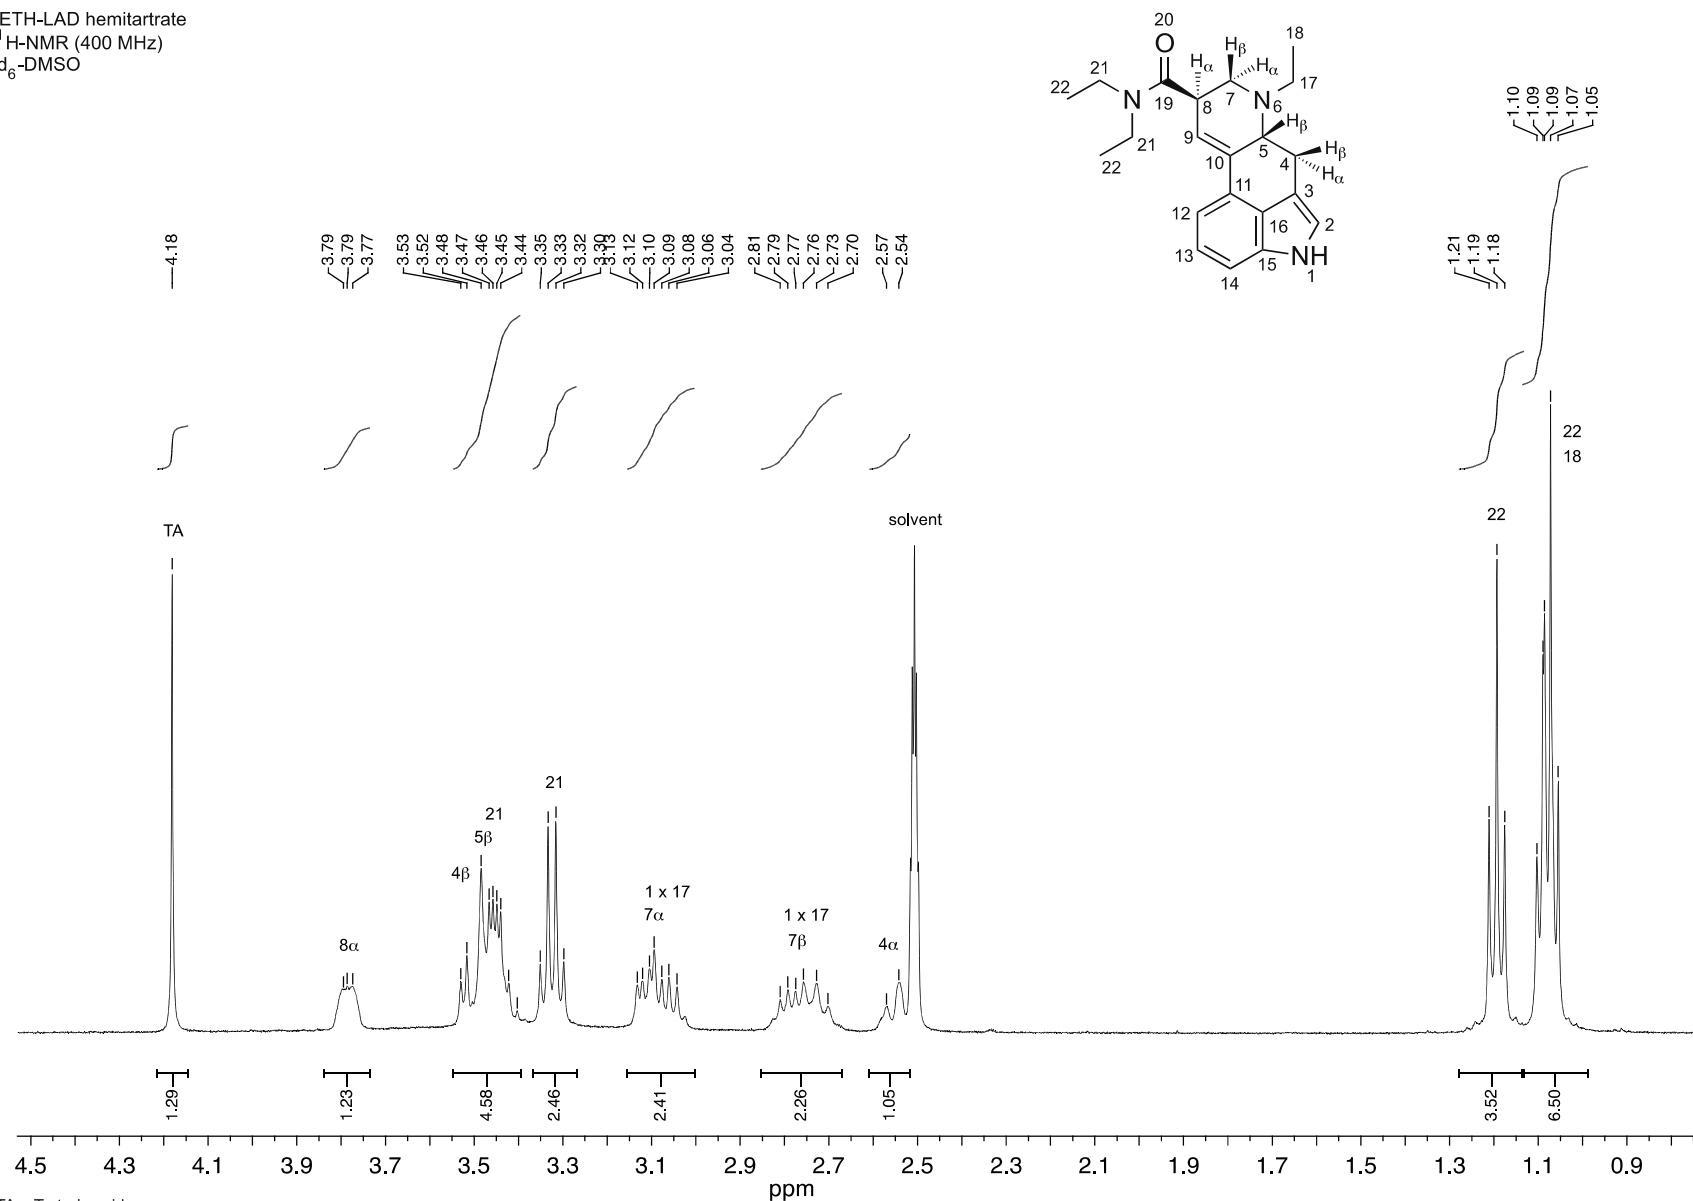

TA = Tartaric acid

Drug Testing and Analysis – Brandt *et al.* – Supporting Information

ETH-LAD hemitartrate  
<sup>13</sup>C-NMR (150 MHz)  
 d<sub>6</sub>-DMSO

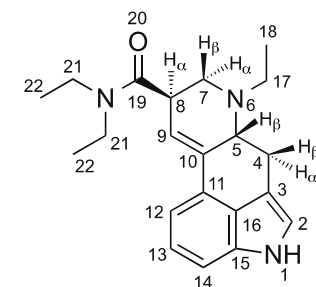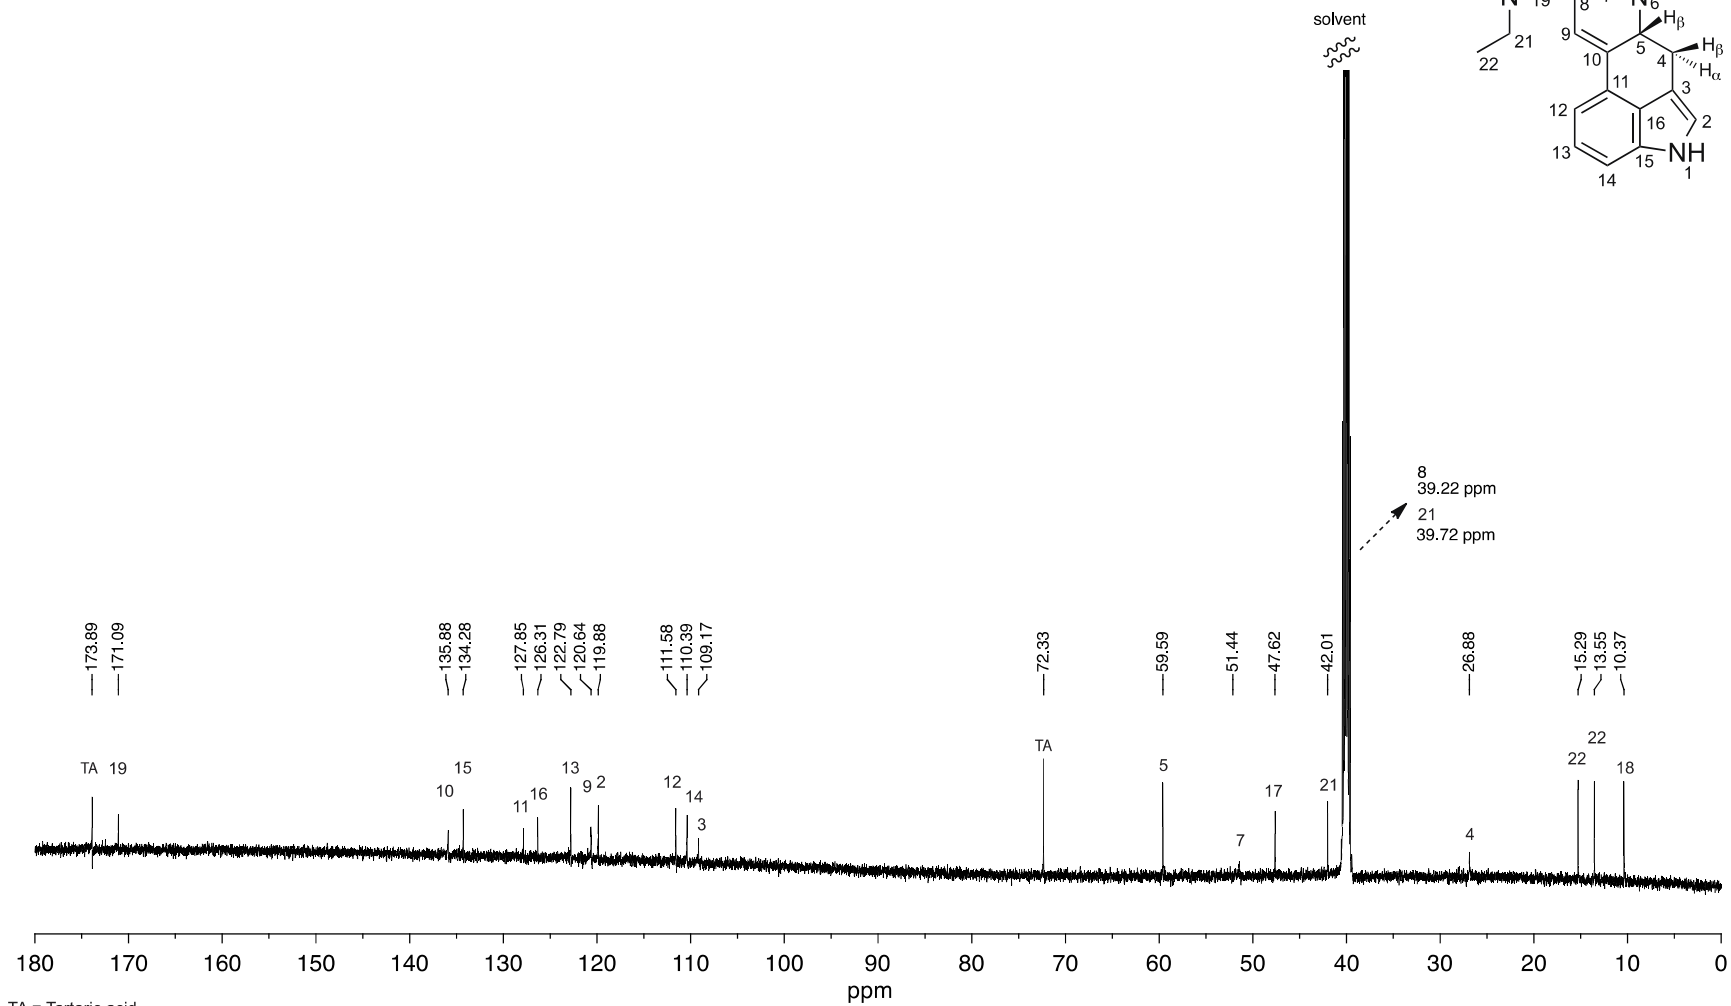

TA = Tartaric acid

Drug Testing and Analysis – Brandt *et al.* – Supporting Information

ETH-LAD hemitartrate  
 HSQC  
 d<sub>6</sub>-DMSO

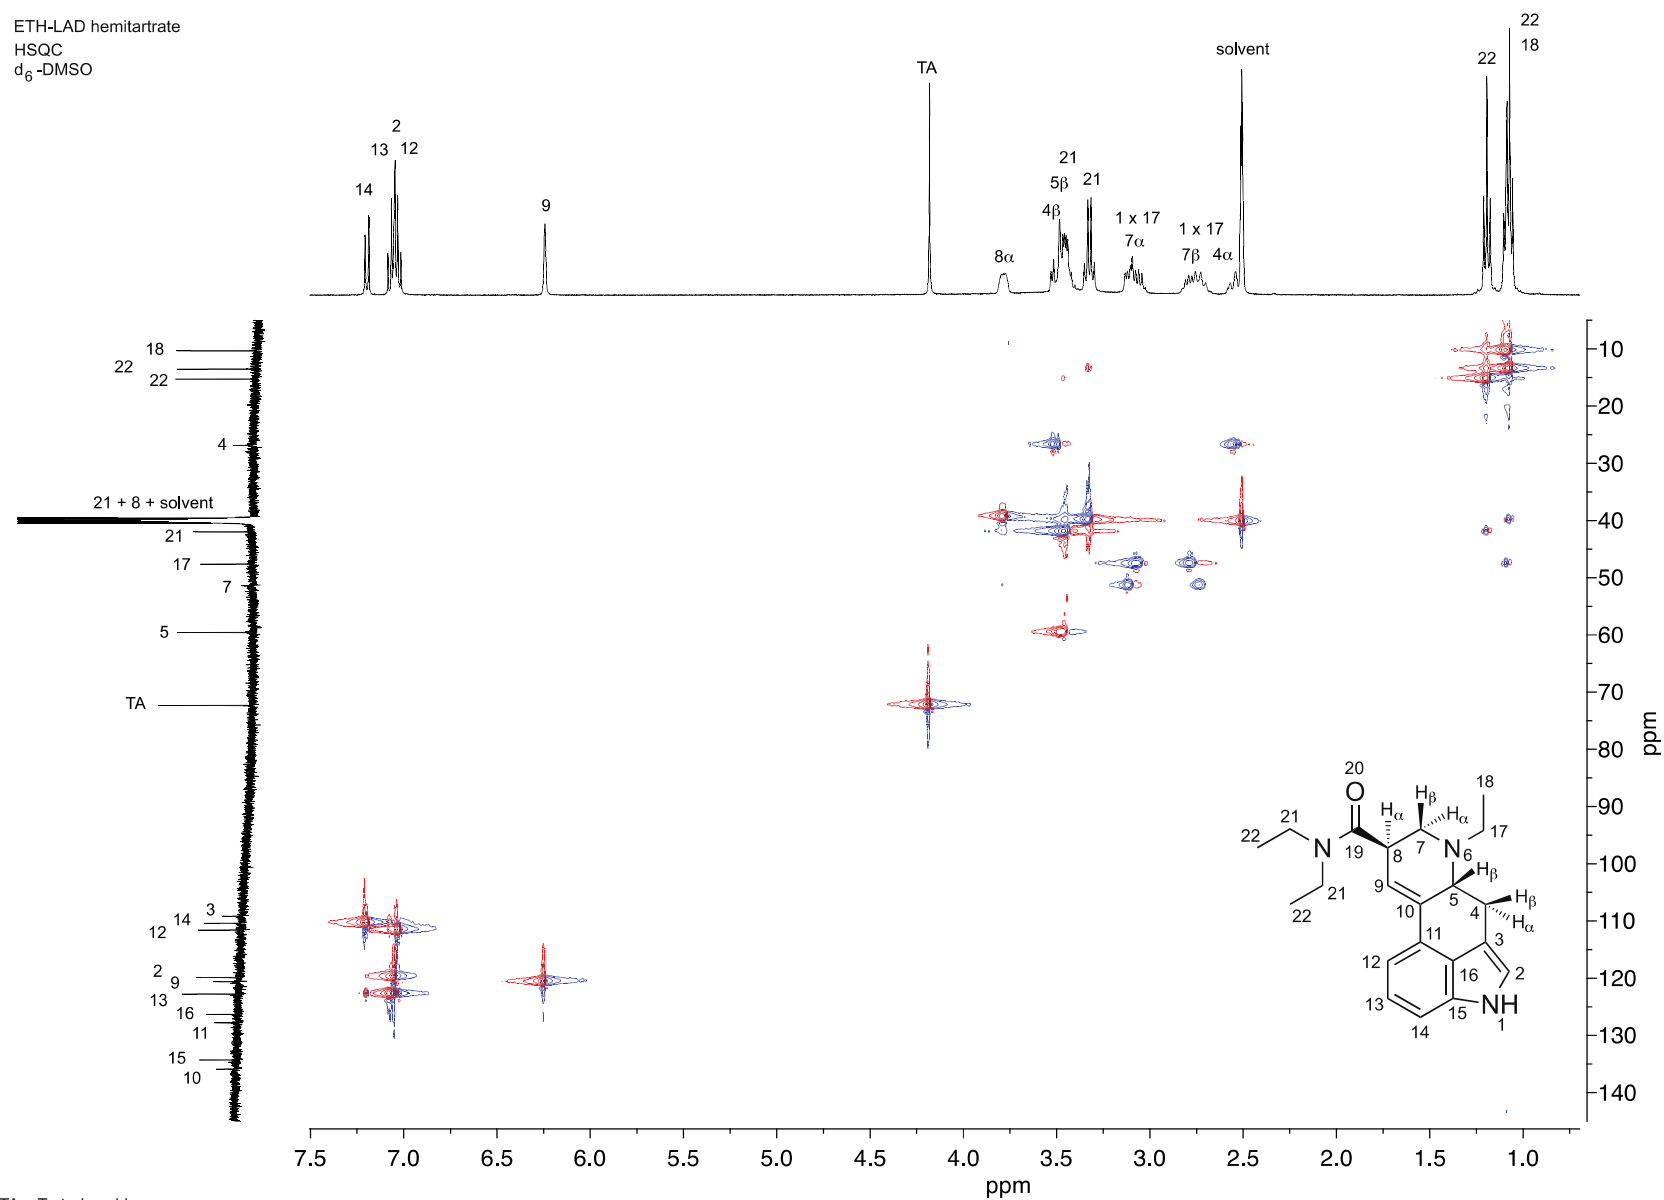

TA = Tartaric acid

Drug Testing and Analysis – Brandt *et al.* – Supporting Information

ETH-LAD hemitartrate  
HSQC  
d<sub>6</sub>-DMSO

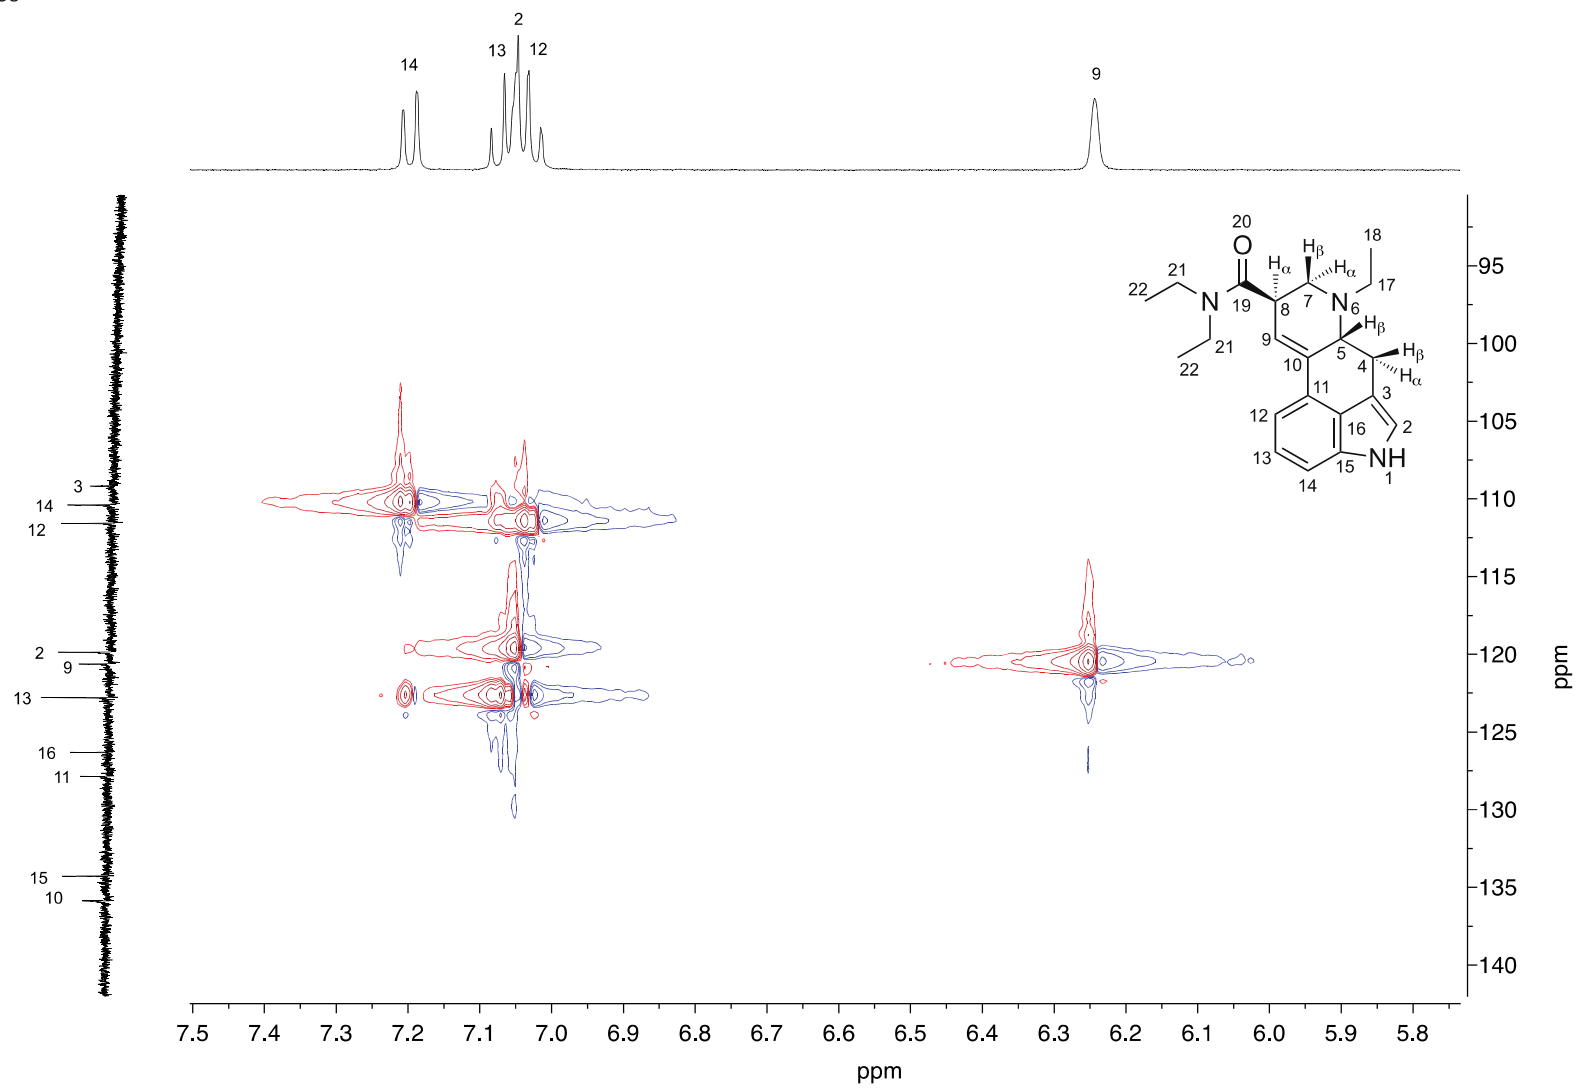

Drug Testing and Analysis – Brandt *et al.* – Supporting Information

ETH-LAD hemitartrate  
HSQC  
d<sub>6</sub>-DMSO

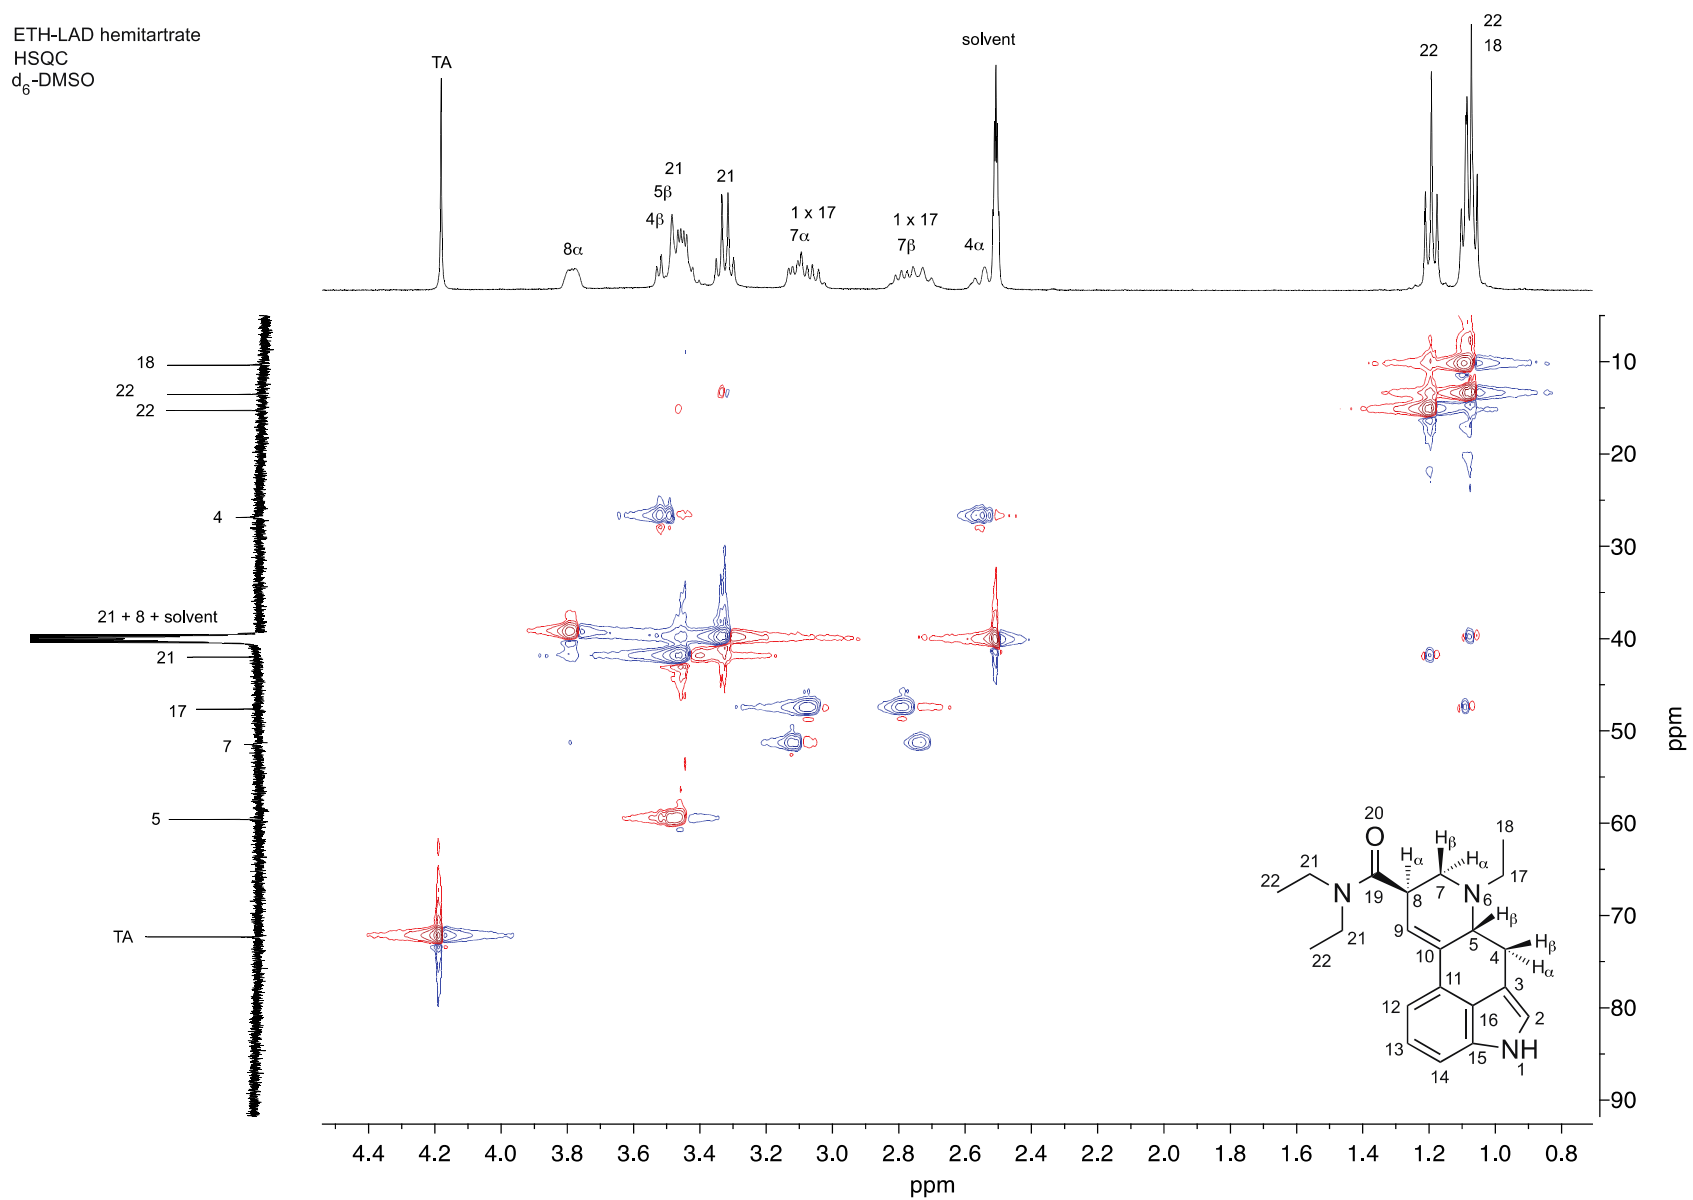

TA = Tartaric acid



Drug Testing and Analysis – Brandt *et al.* – Supporting Information

ETH-LAD hemitartrate  
 HSQC  
 d<sub>6</sub>-DMSO

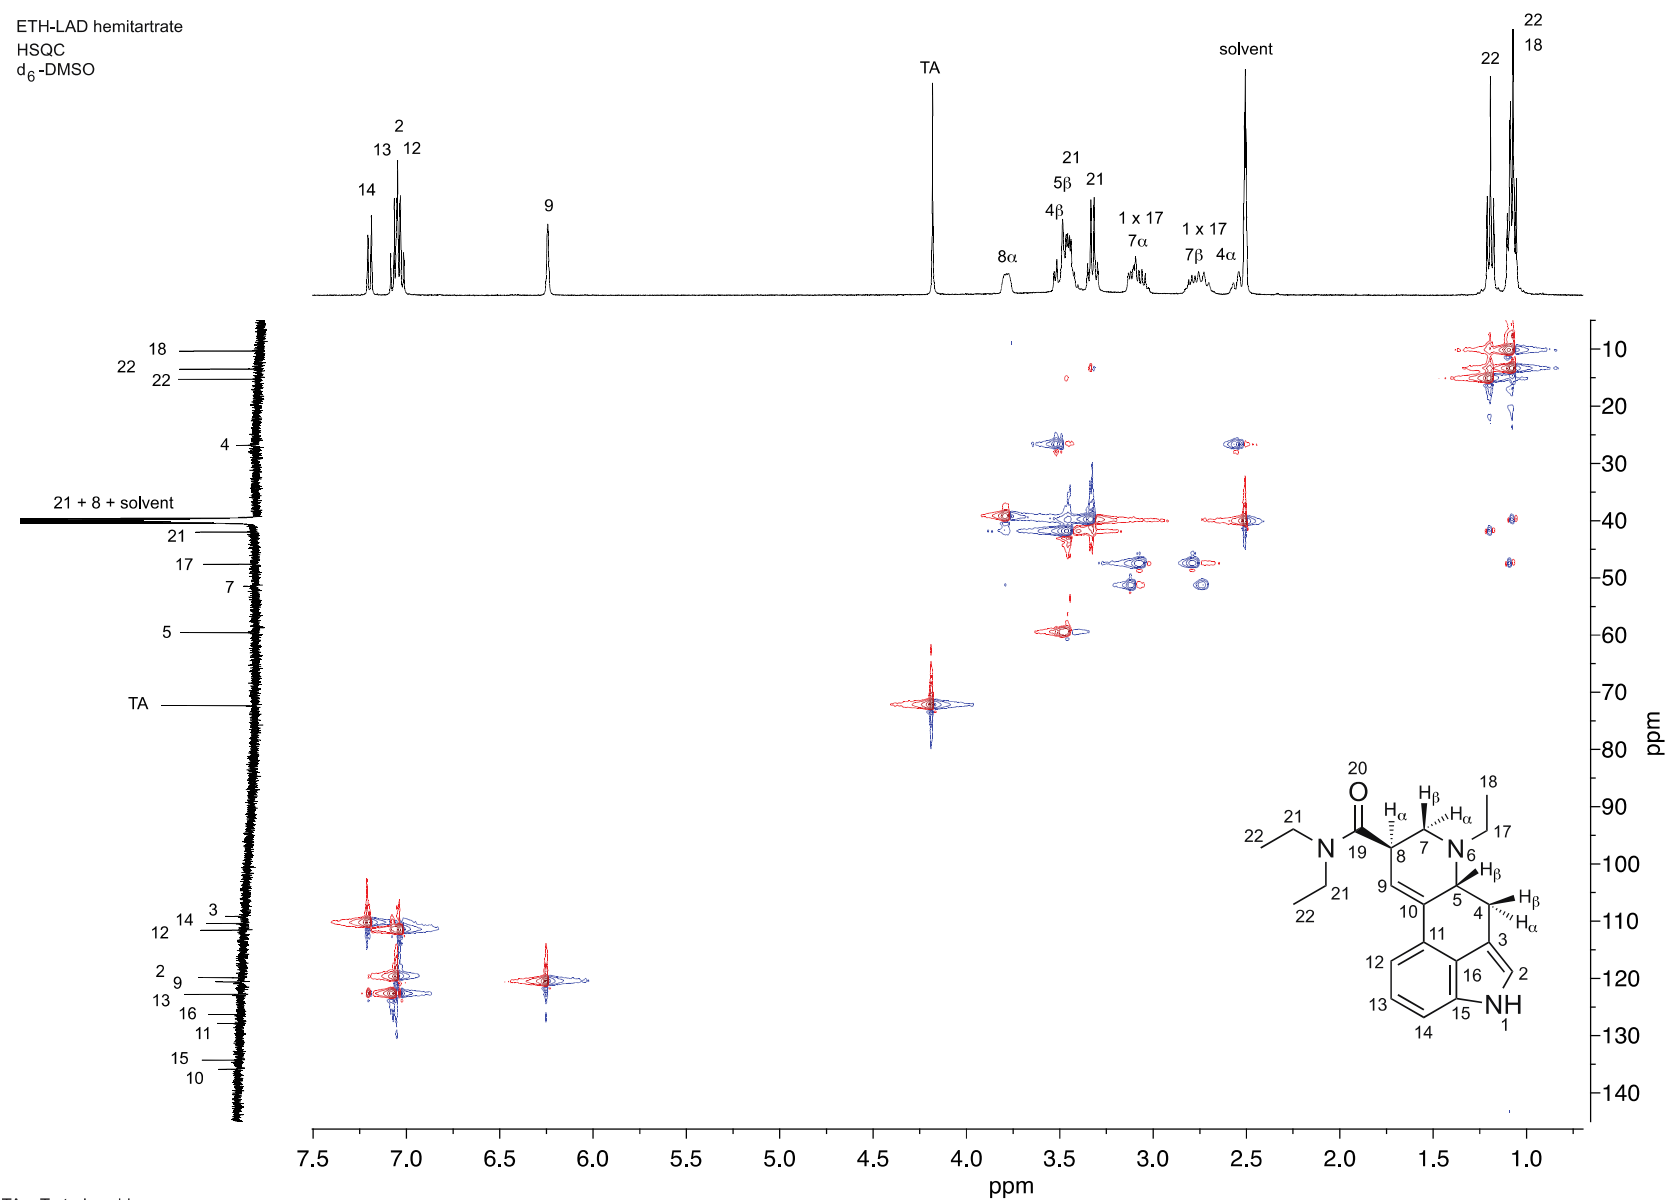

TA = Tartaric acid

Drug Testing and Analysis – Brandt *et al.* – Supporting Information

ETH-LAD hemitartrate  
HMBC  
d<sub>6</sub>-DMSO

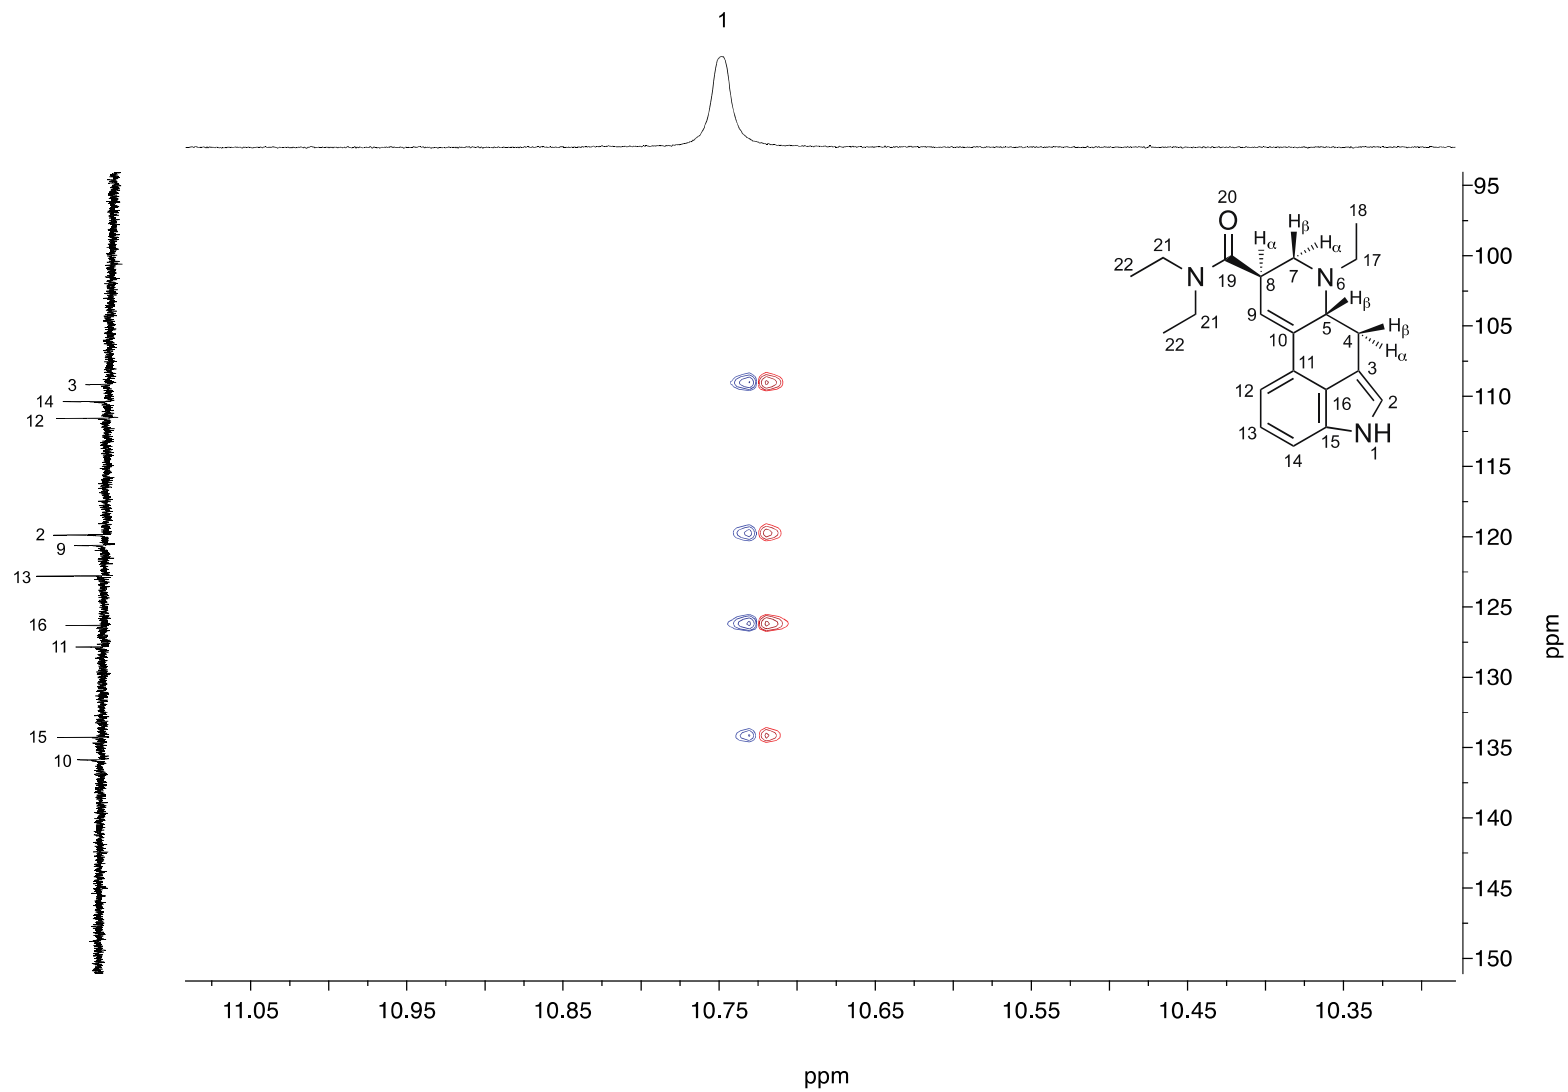

Drug Testing and Analysis – Brandt *et al.* – Supporting Information

ETH-LAD hemitartrate  
 HMBC  
 d<sub>6</sub>-DMSO

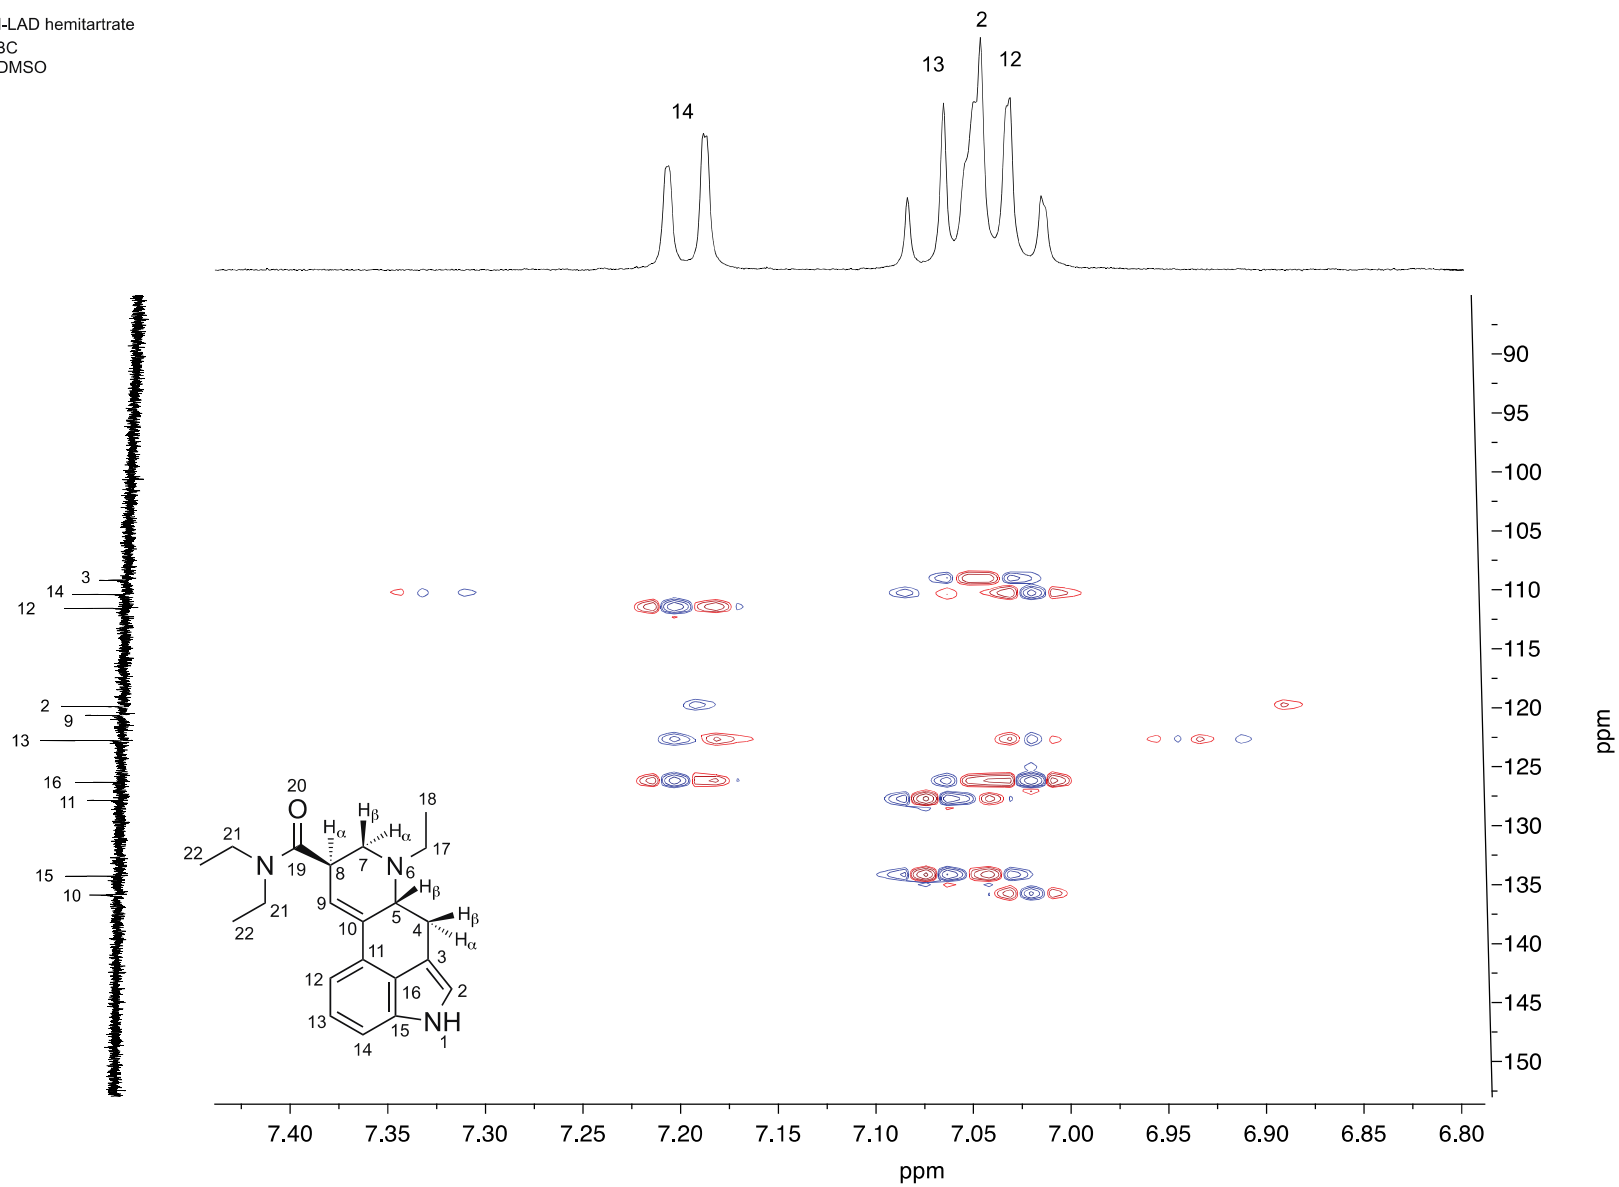

Drug Testing and Analysis – Brandt *et al.* – Supporting Information

ETH-LAD hemitartrate  
 HMBC  
 d<sub>6</sub>-DMSO

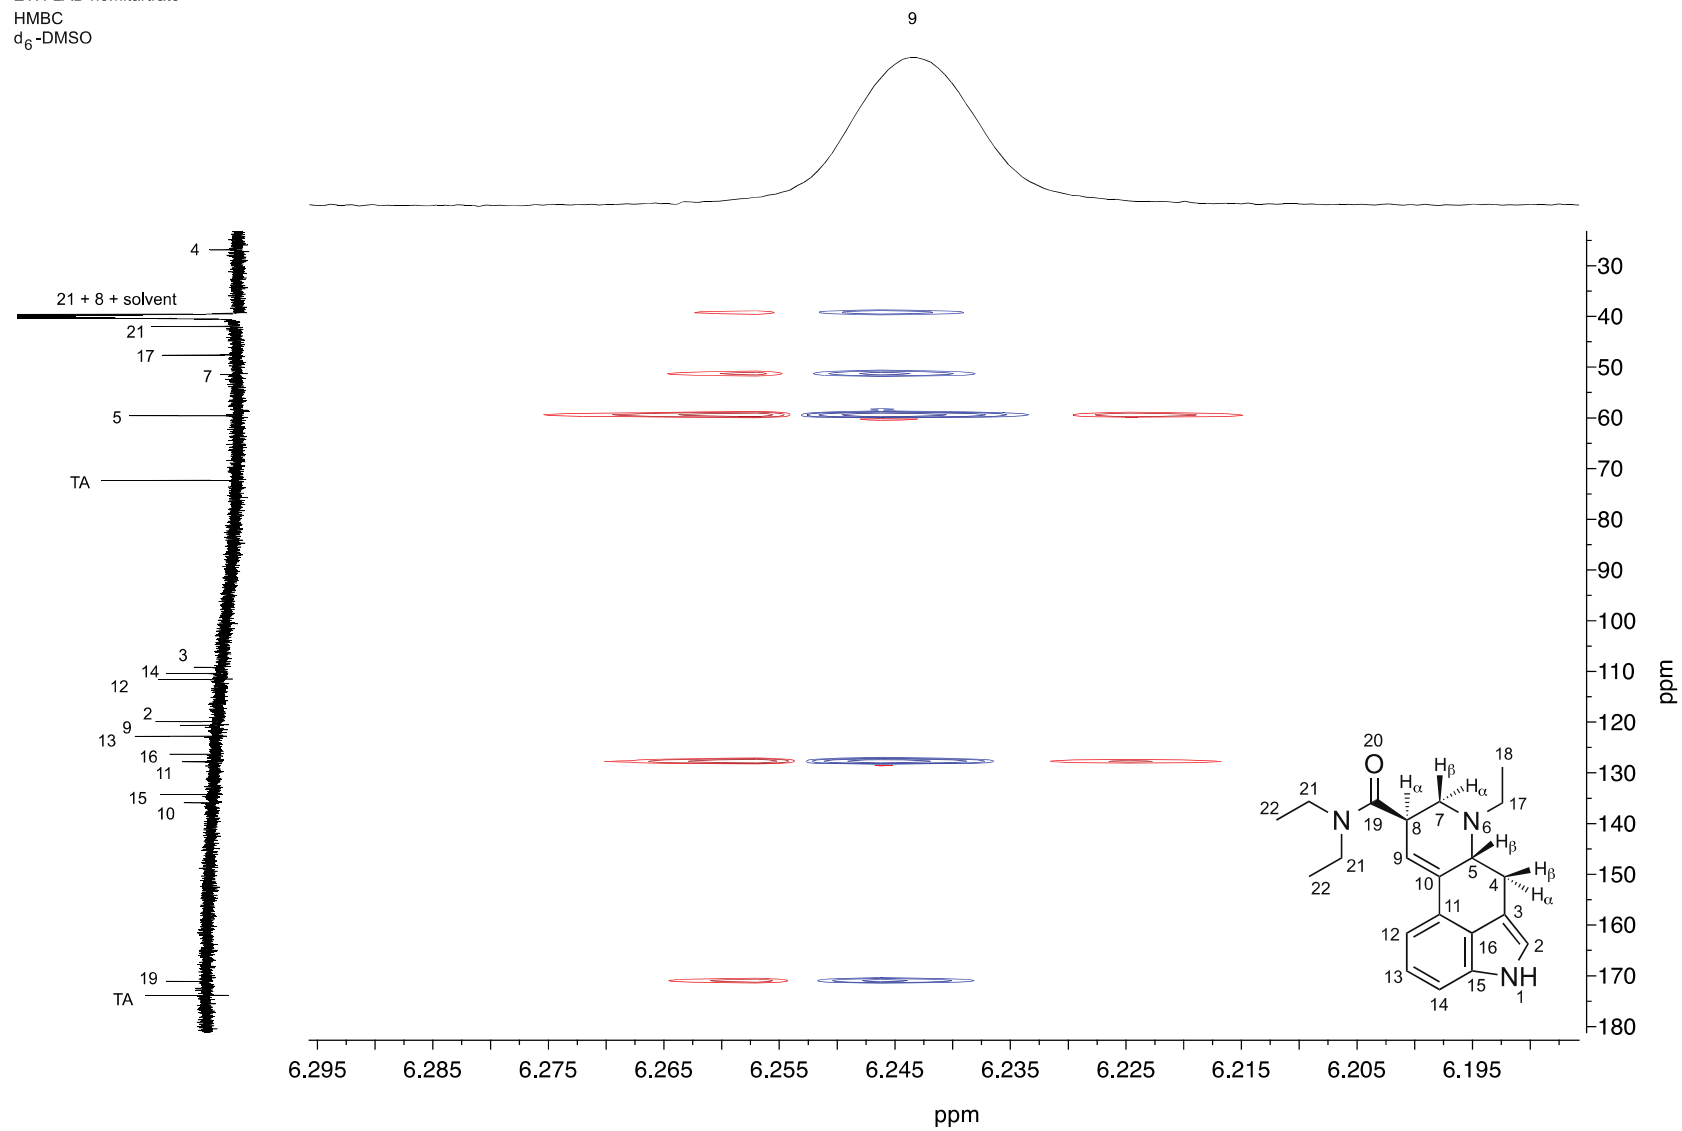

TA = Tartaric acid

Drug Testing and Analysis – Brandt *et al.* – Supporting Information

ETH-LAD hemitartrate  
 HMBC  
 d<sub>6</sub>-DMSO

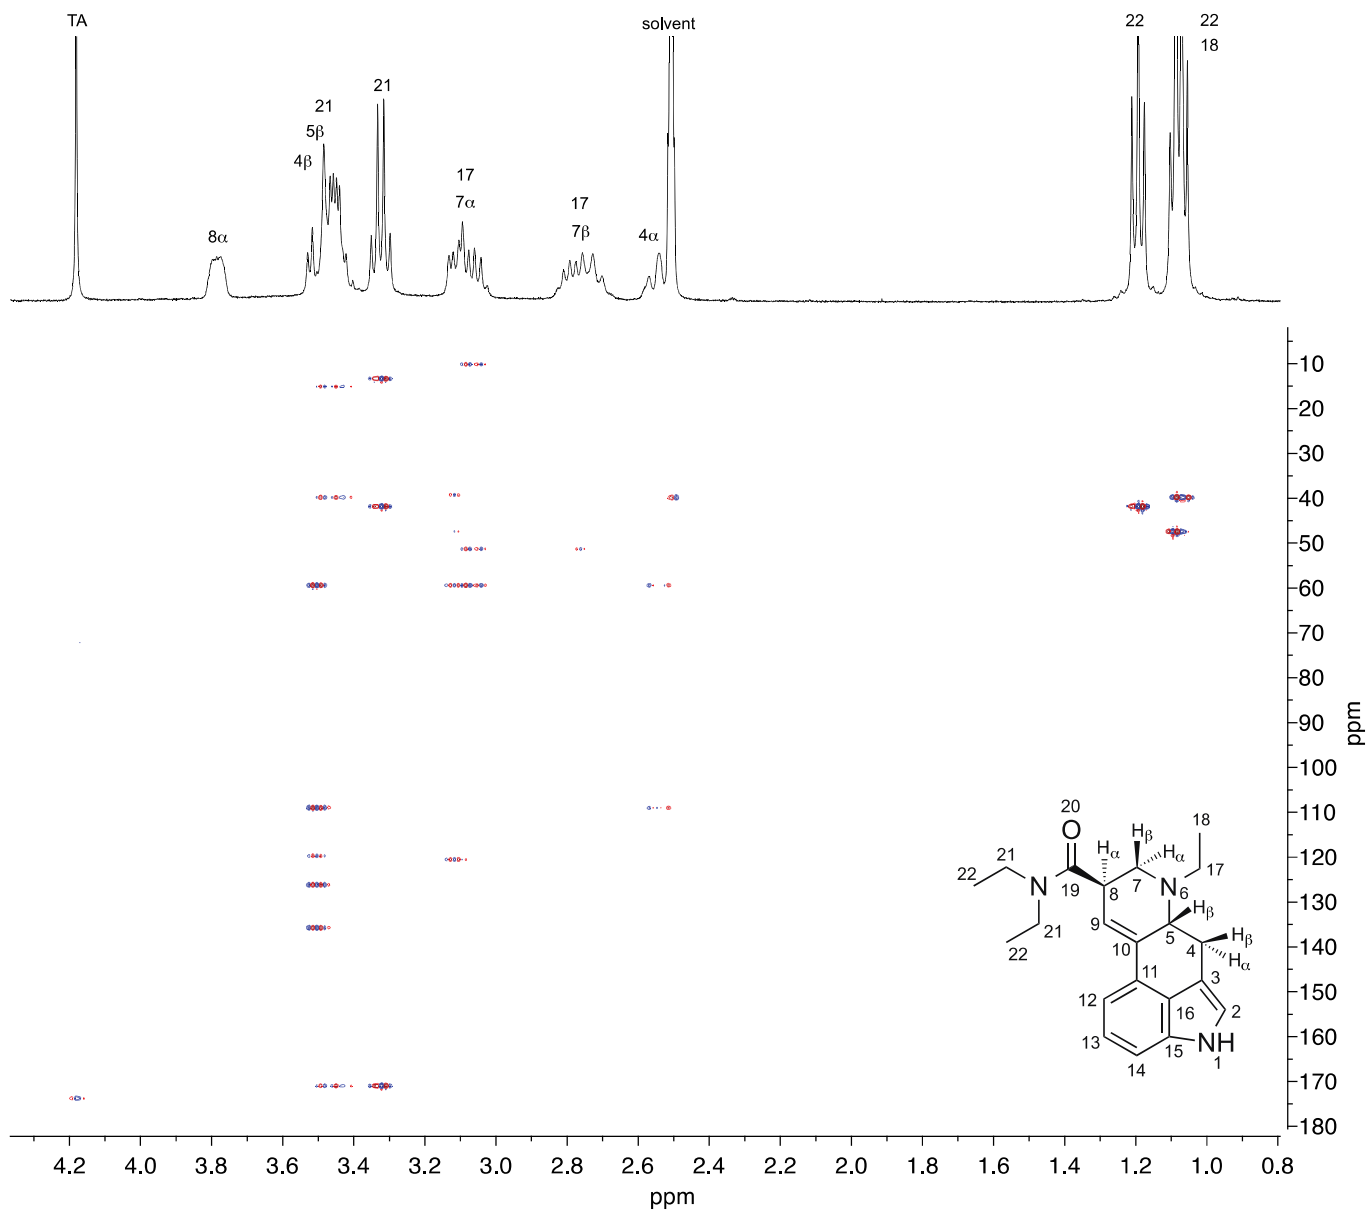

TA = Tartaric acid

Drug Testing and Analysis – Brandt *et al.* – Supporting Information

ETH-LAD hemitartrate  
HMBC  
d<sub>6</sub>-DMSO

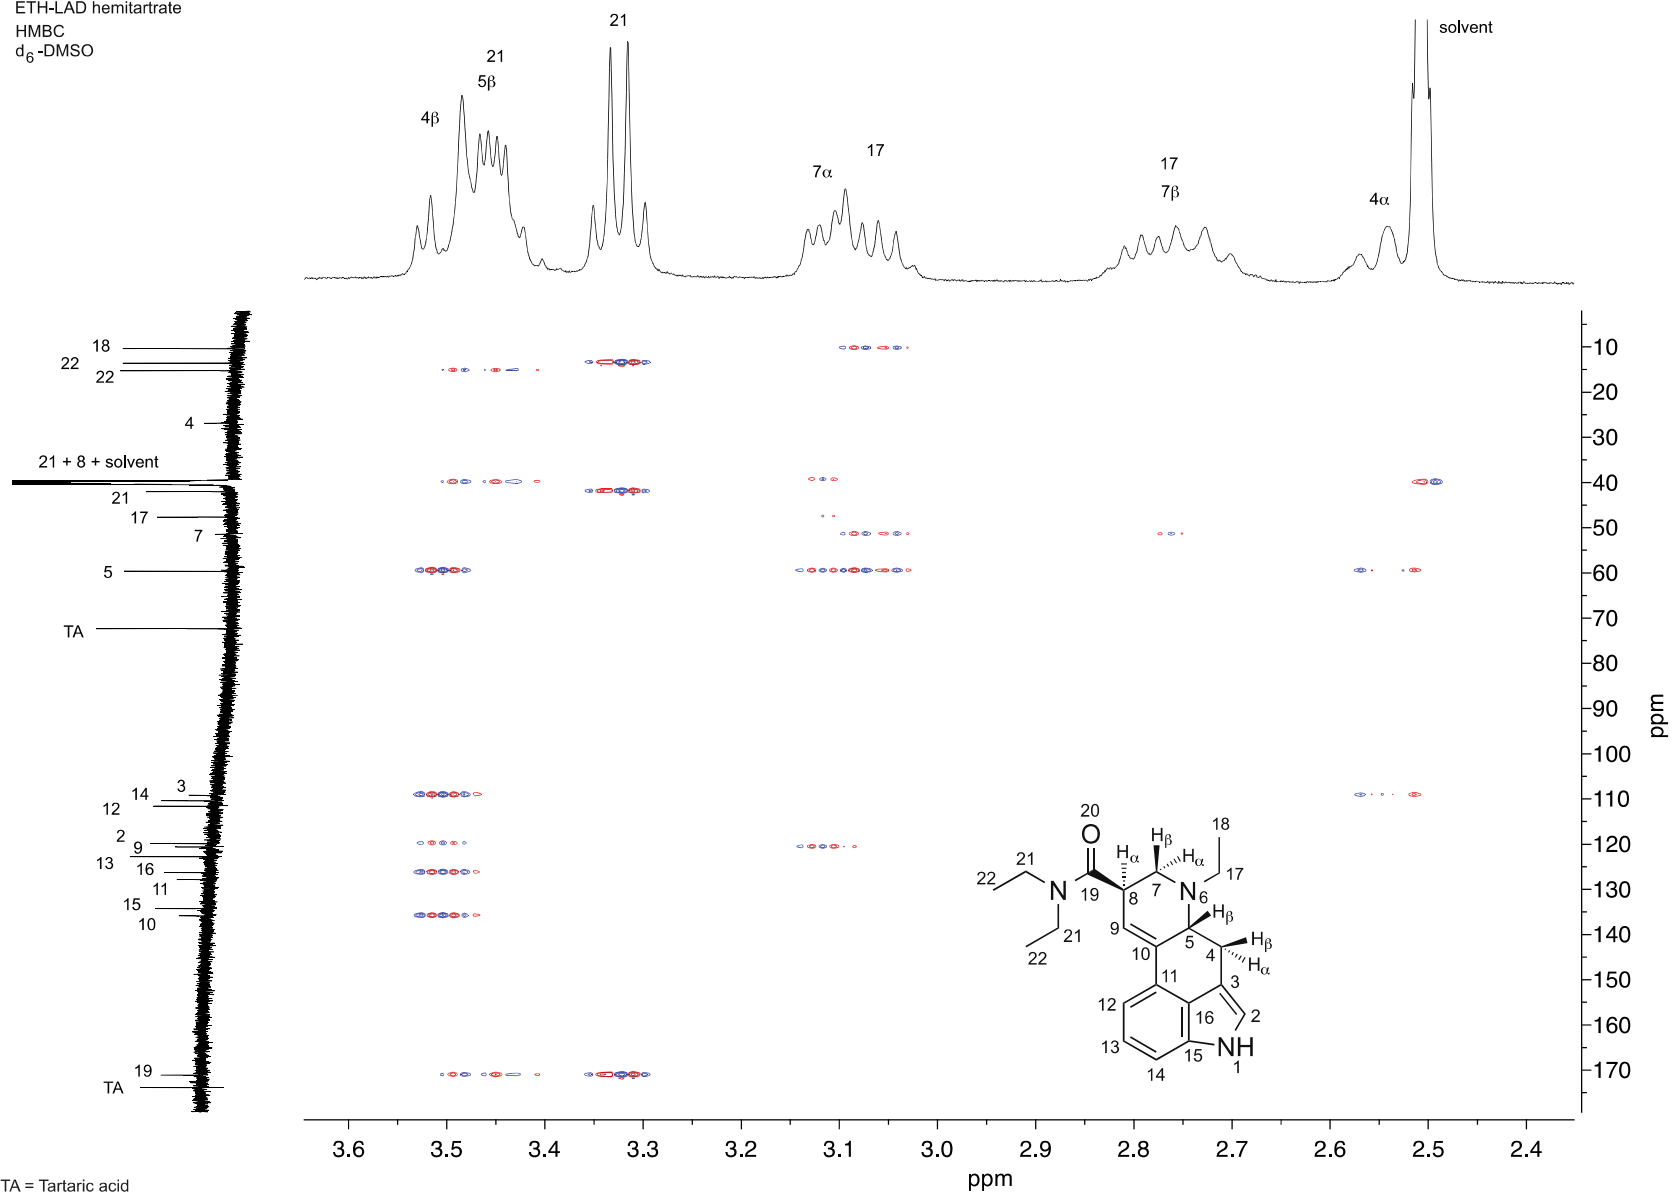

TA = Tartaric acid

Drug Testing and Analysis – Brandt *et al.* – Supporting Information

ETH-LAD hemitartrate  
 HMBC  
 d<sub>6</sub>-DMSO

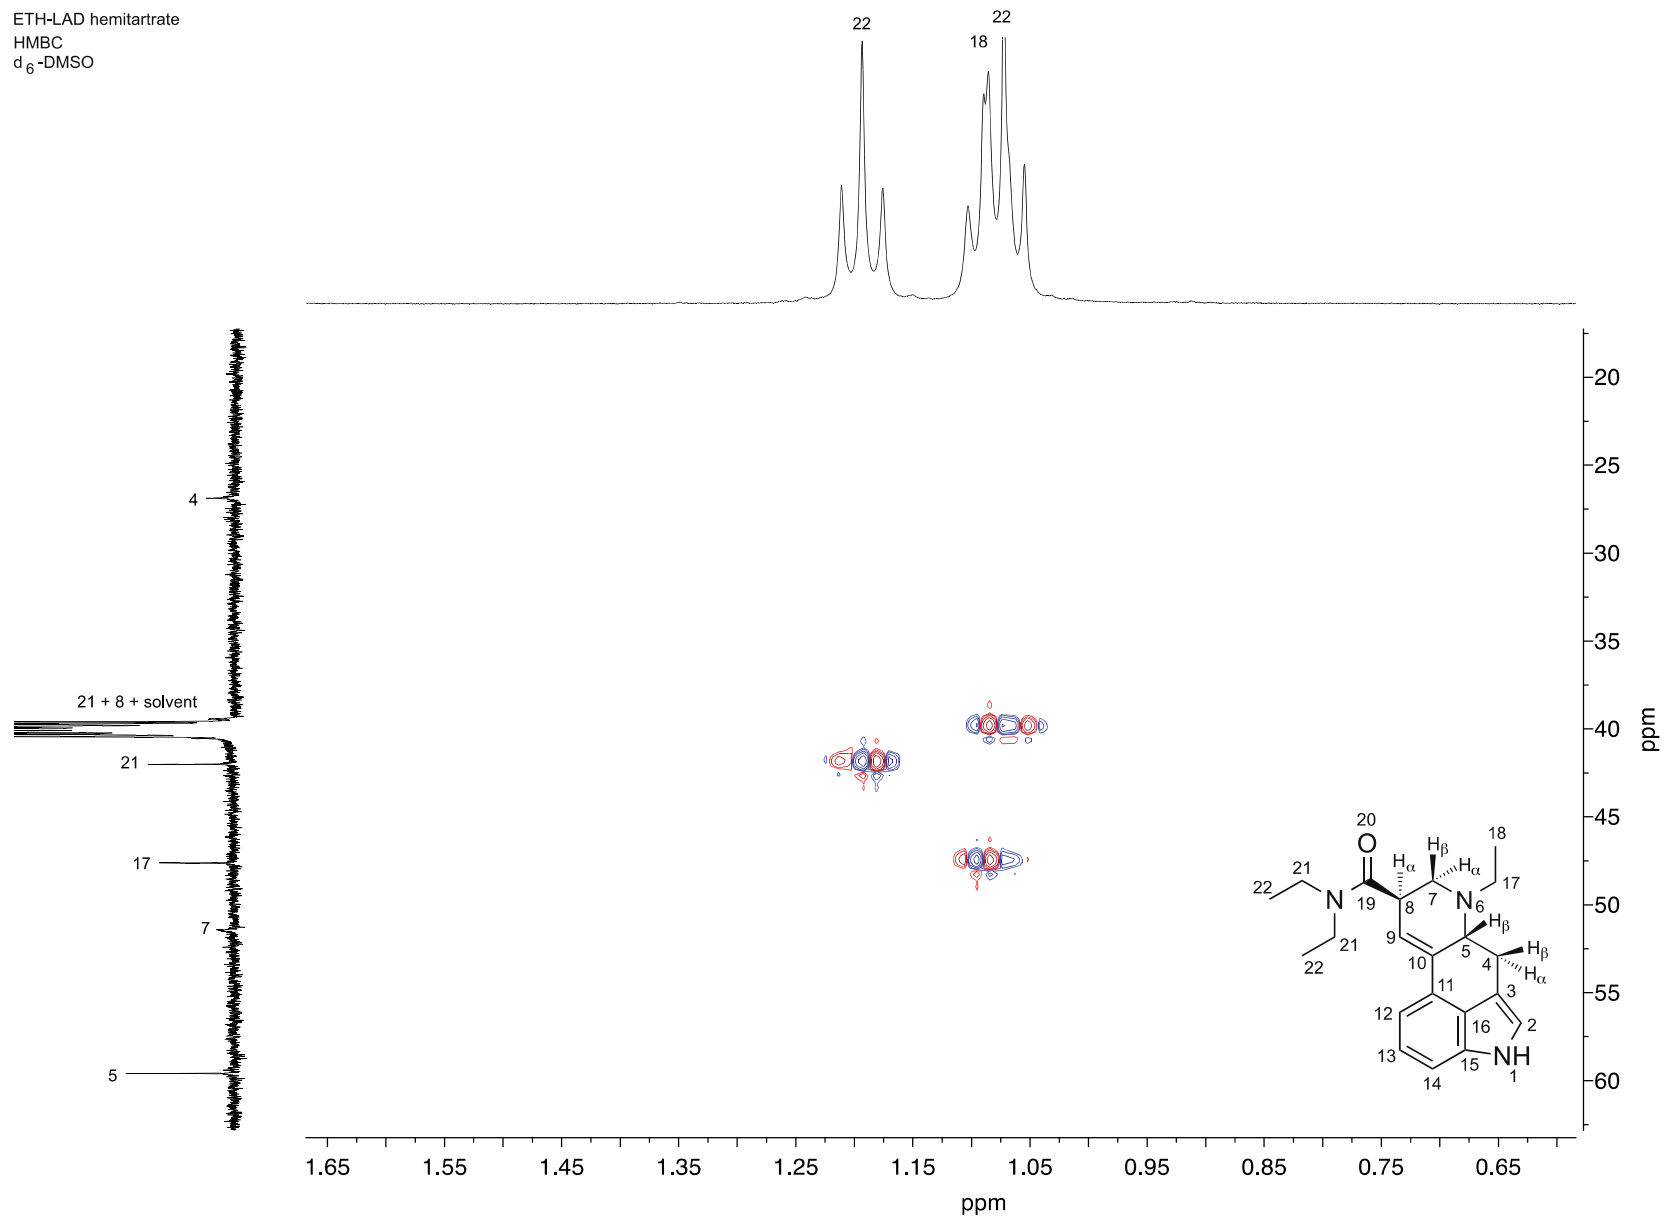

Drug Testing and Analysis – Brandt *et al.* – Supporting Information

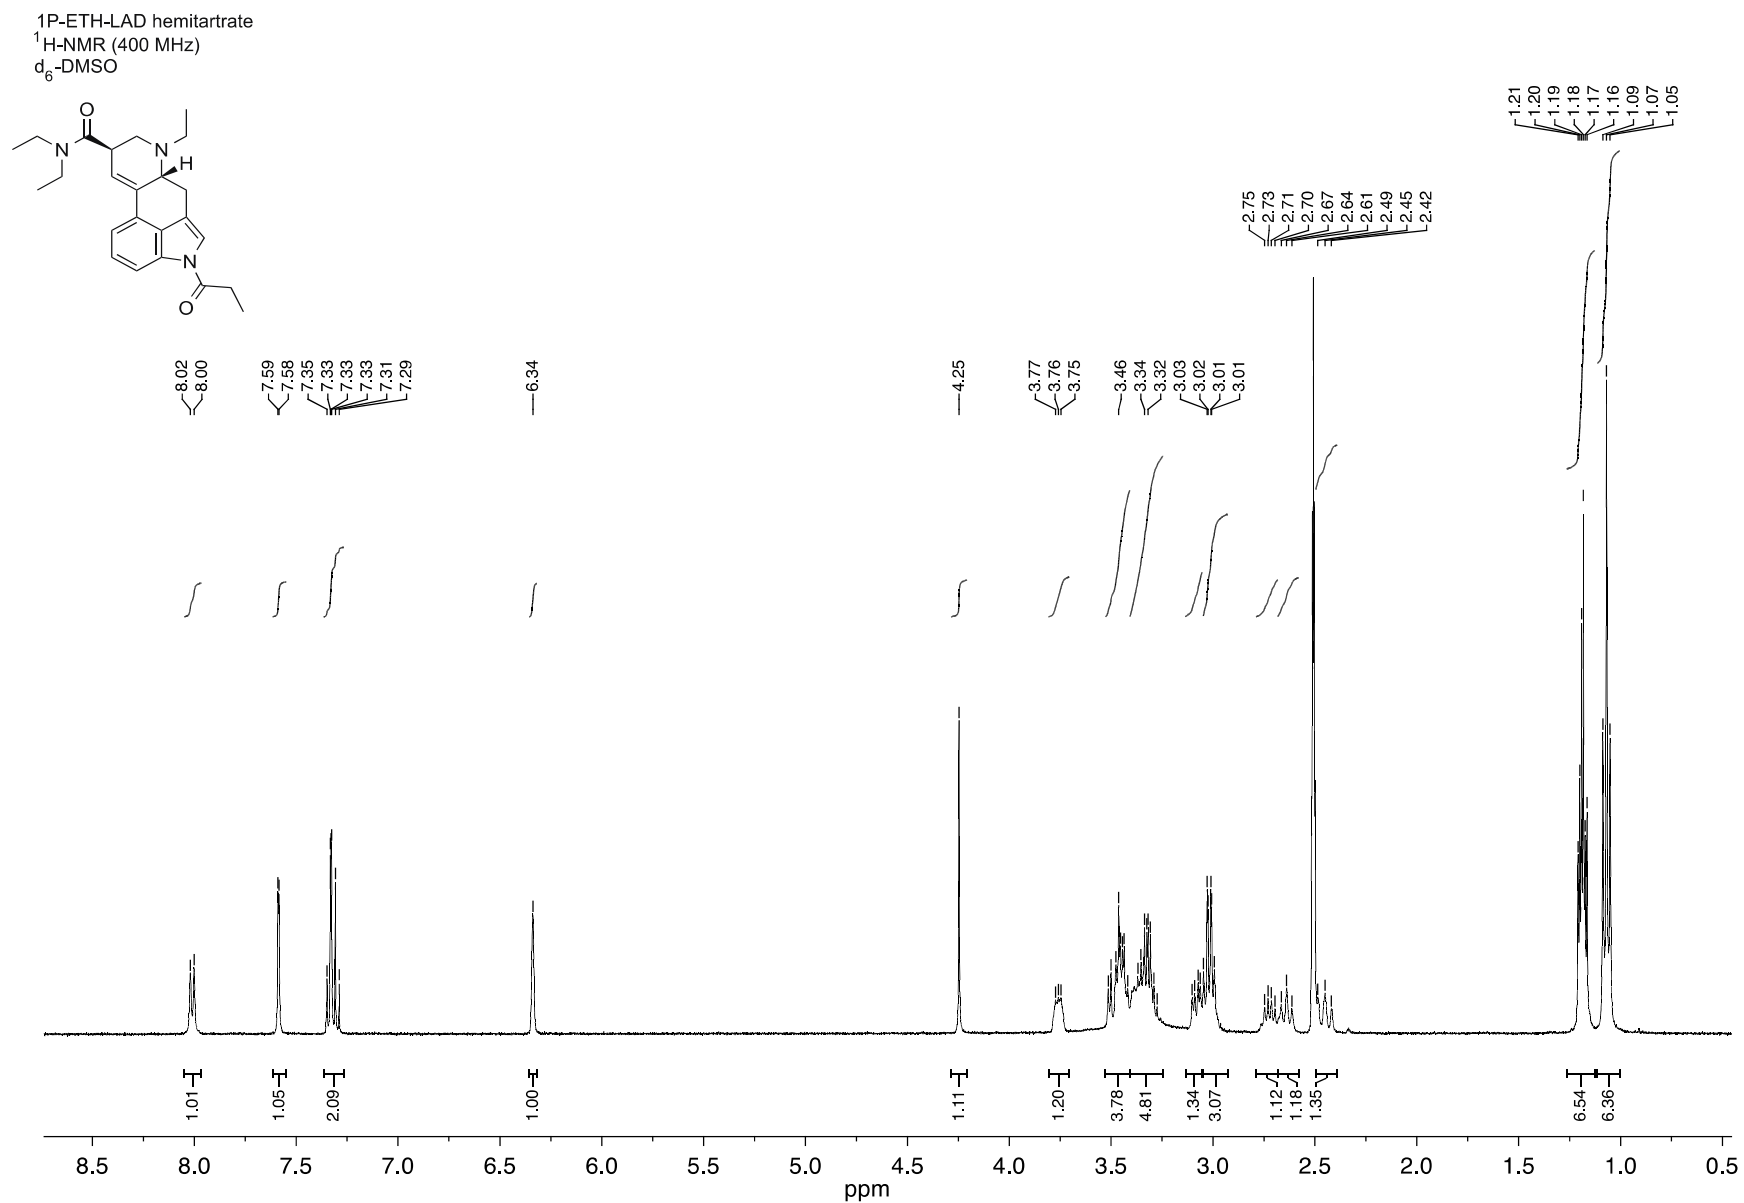



Drug Testing and Analysis – Brandt *et al.* – Supporting Information

1P-ETH-LAD hemitartrate  
<sup>1</sup>H-NMR (400 MHz)  
d<sub>6</sub>-DMSO

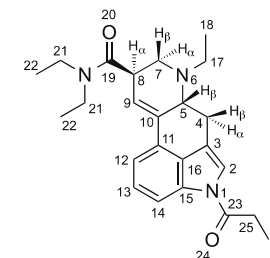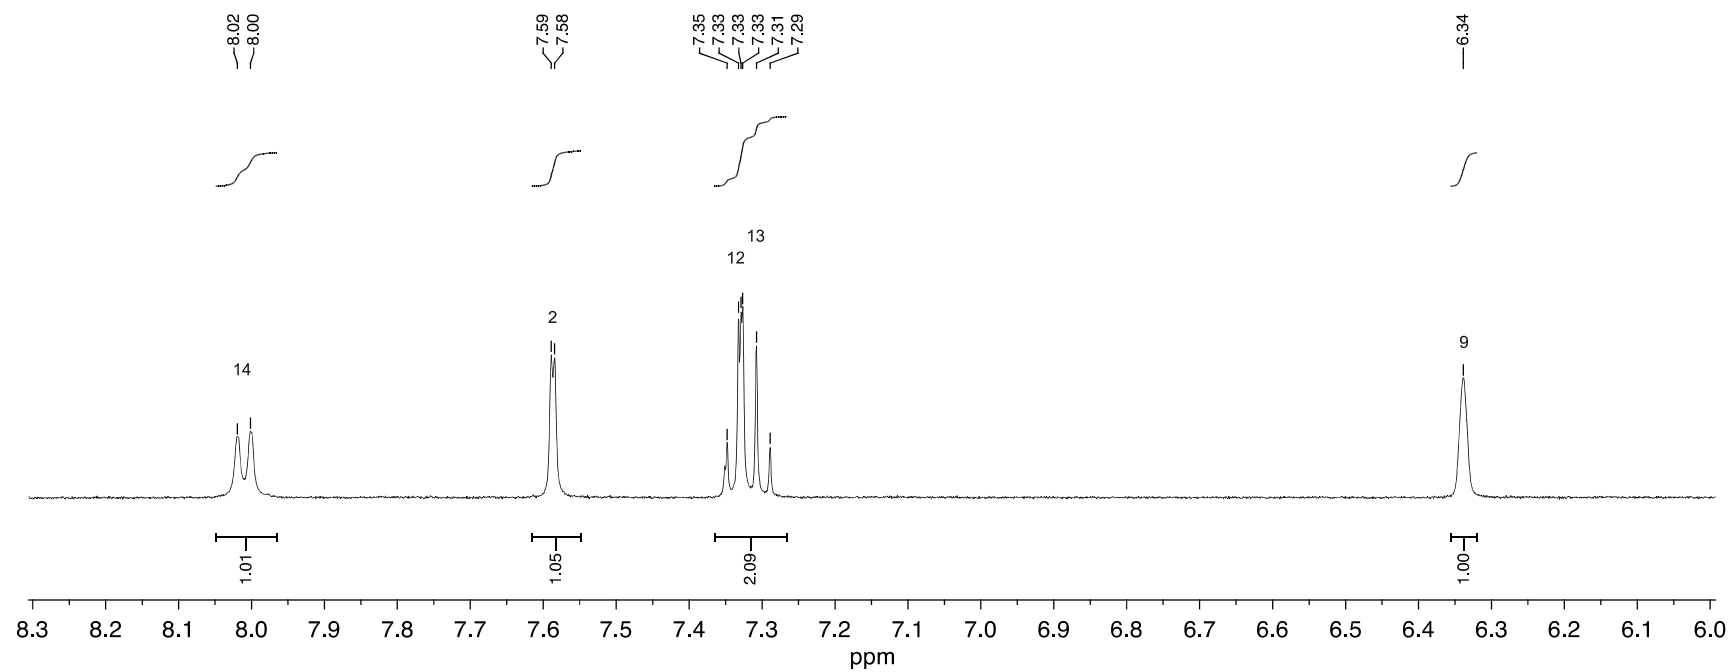

1P-ETH-LAD hemitartrate  
<sup>1</sup>H-NMR (400 MHz)  
 d<sub>6</sub>-DMSO

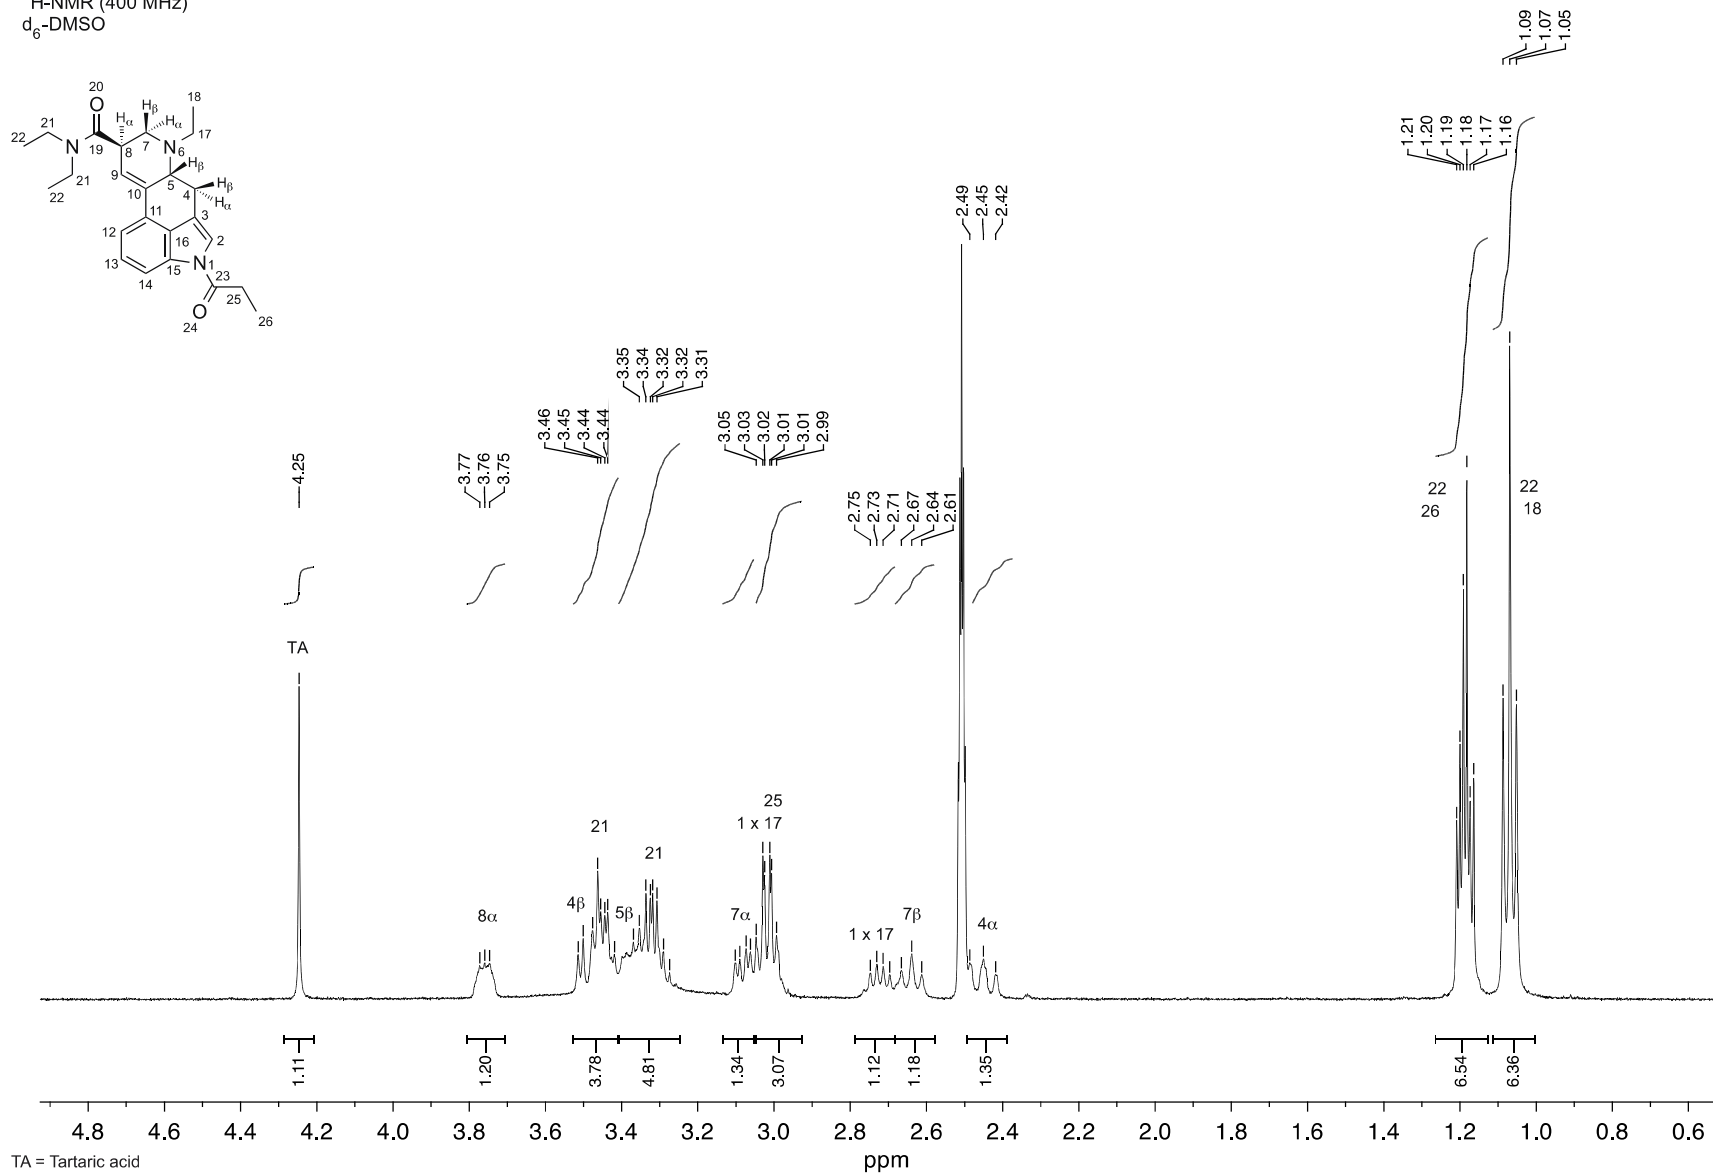

Drug Testing and Analysis – Brandt *et al.* – Supporting Information

1P-ETH-LAD hemitartrate  
<sup>13</sup>C-NMR (150 MHz)  
 d<sub>6</sub>-DMSO

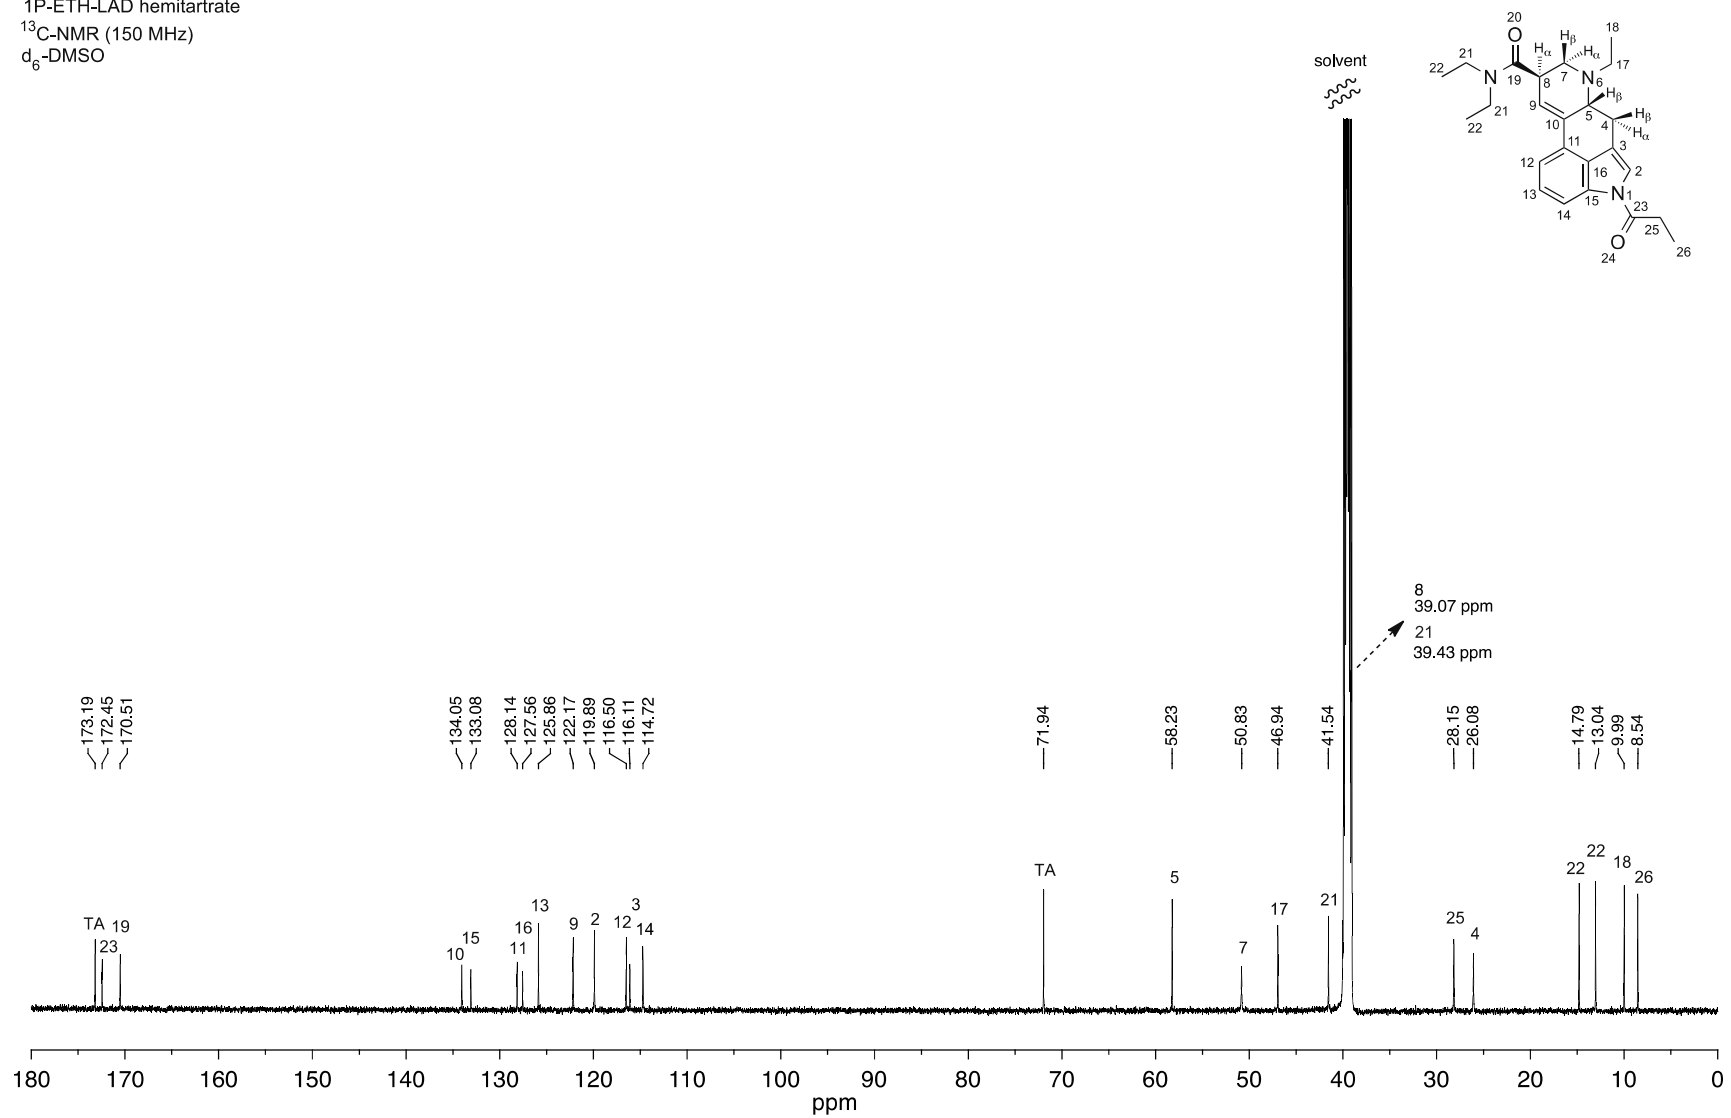

TA = Tartaric acid

Drug Testing and Analysis – Brandt *et al.* – Supporting Information

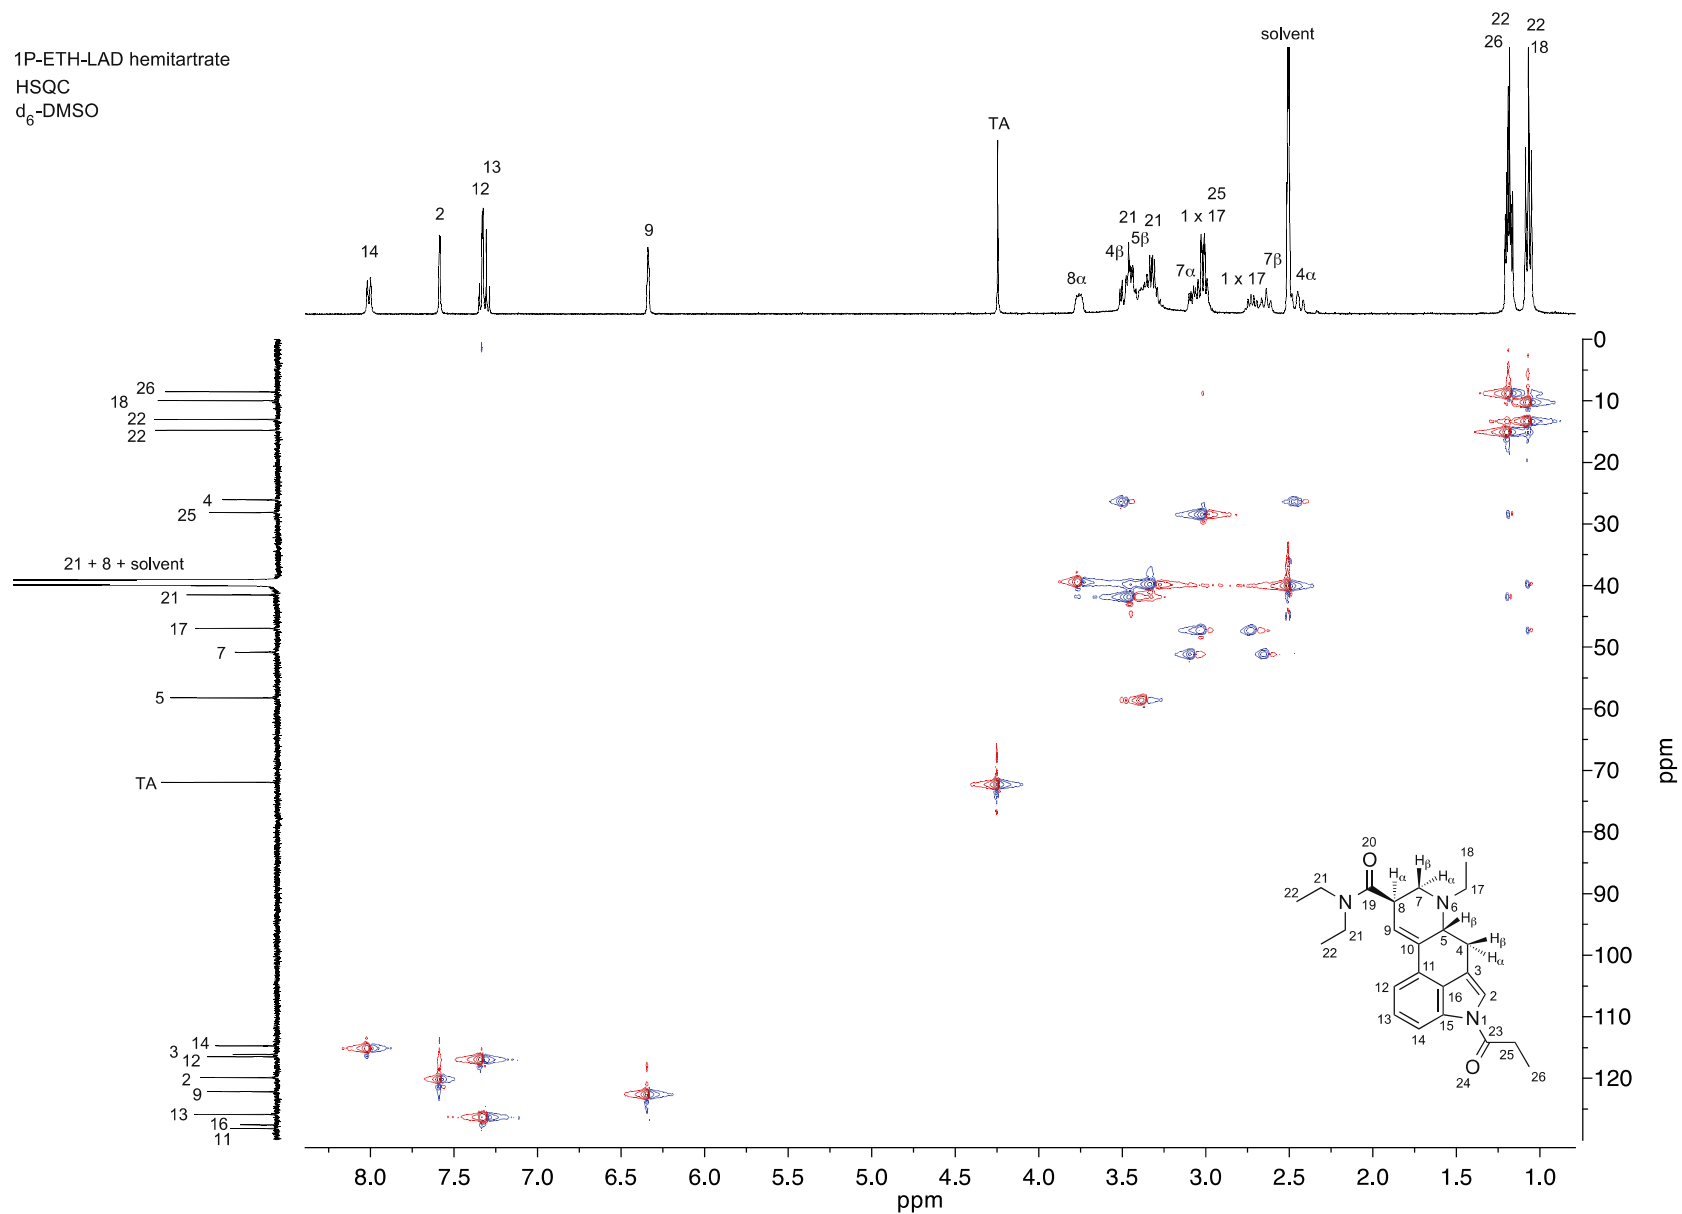

Drug Testing and Analysis – Brandt *et al.* – Supporting Information

1P-ETH-LAD hemitartrate  
HSQC  
d<sub>6</sub>-DMSO

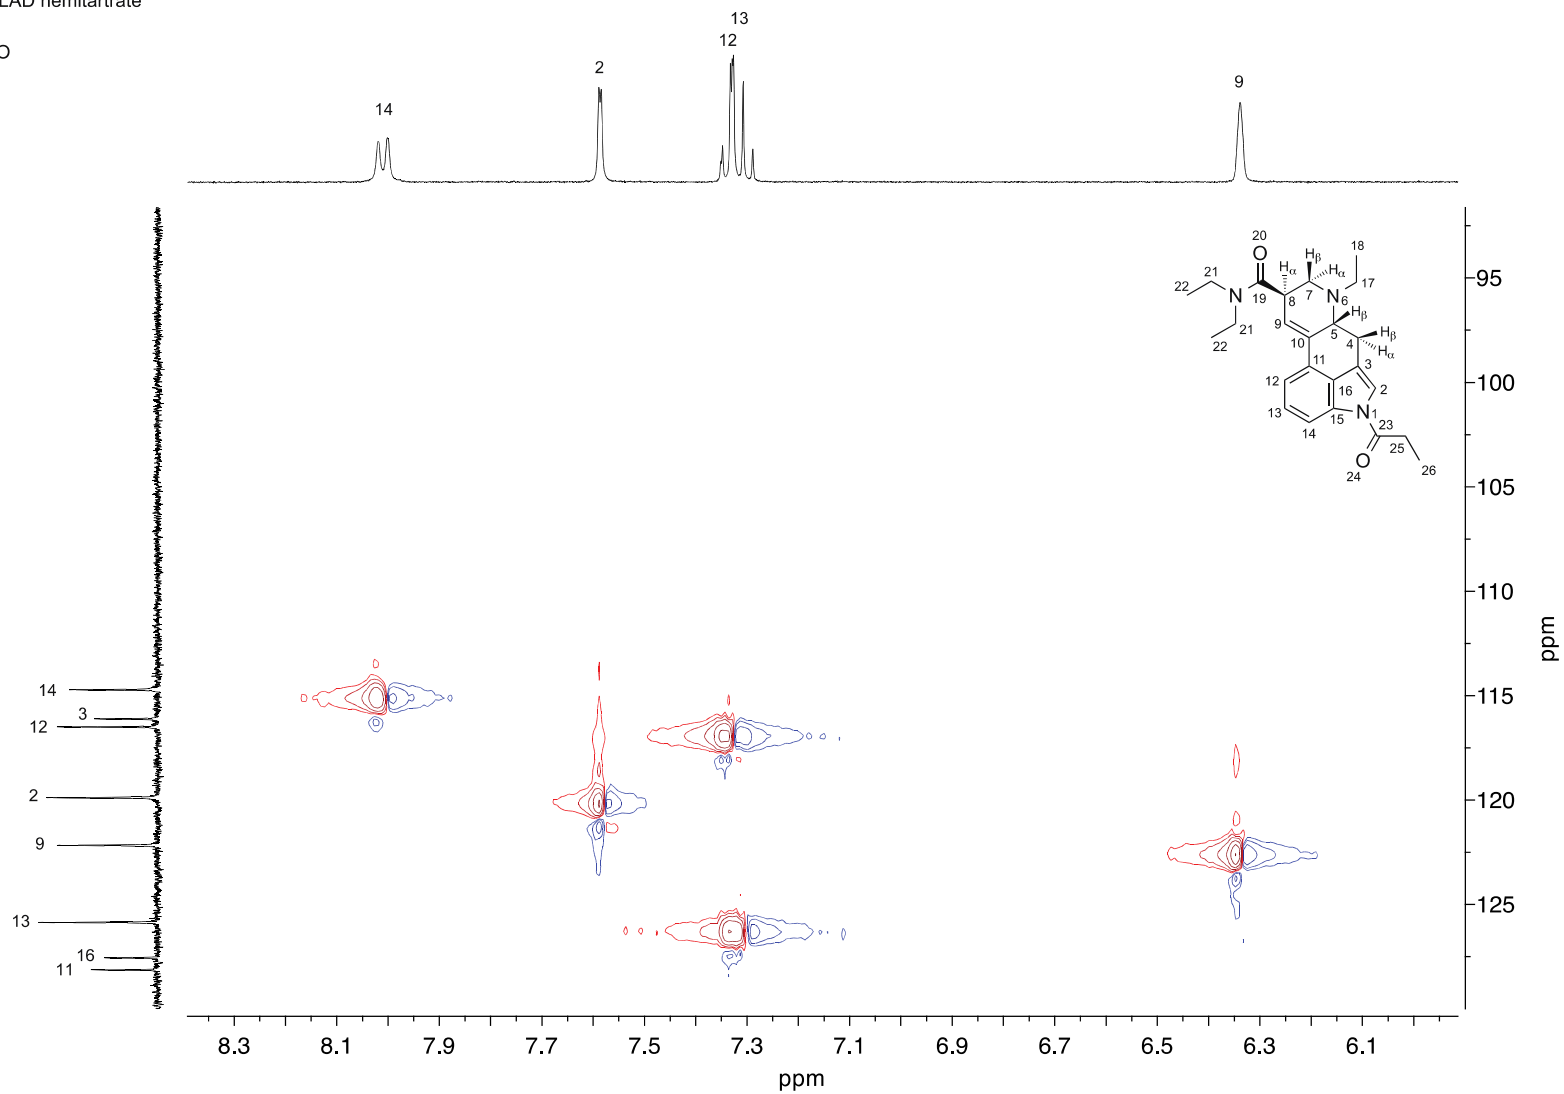

Drug Testing and Analysis – Brandt *et al.* – Supporting Information

1P-ETH-LAD hemitartrate  
 HSQC  
 d<sub>6</sub>-DMSO

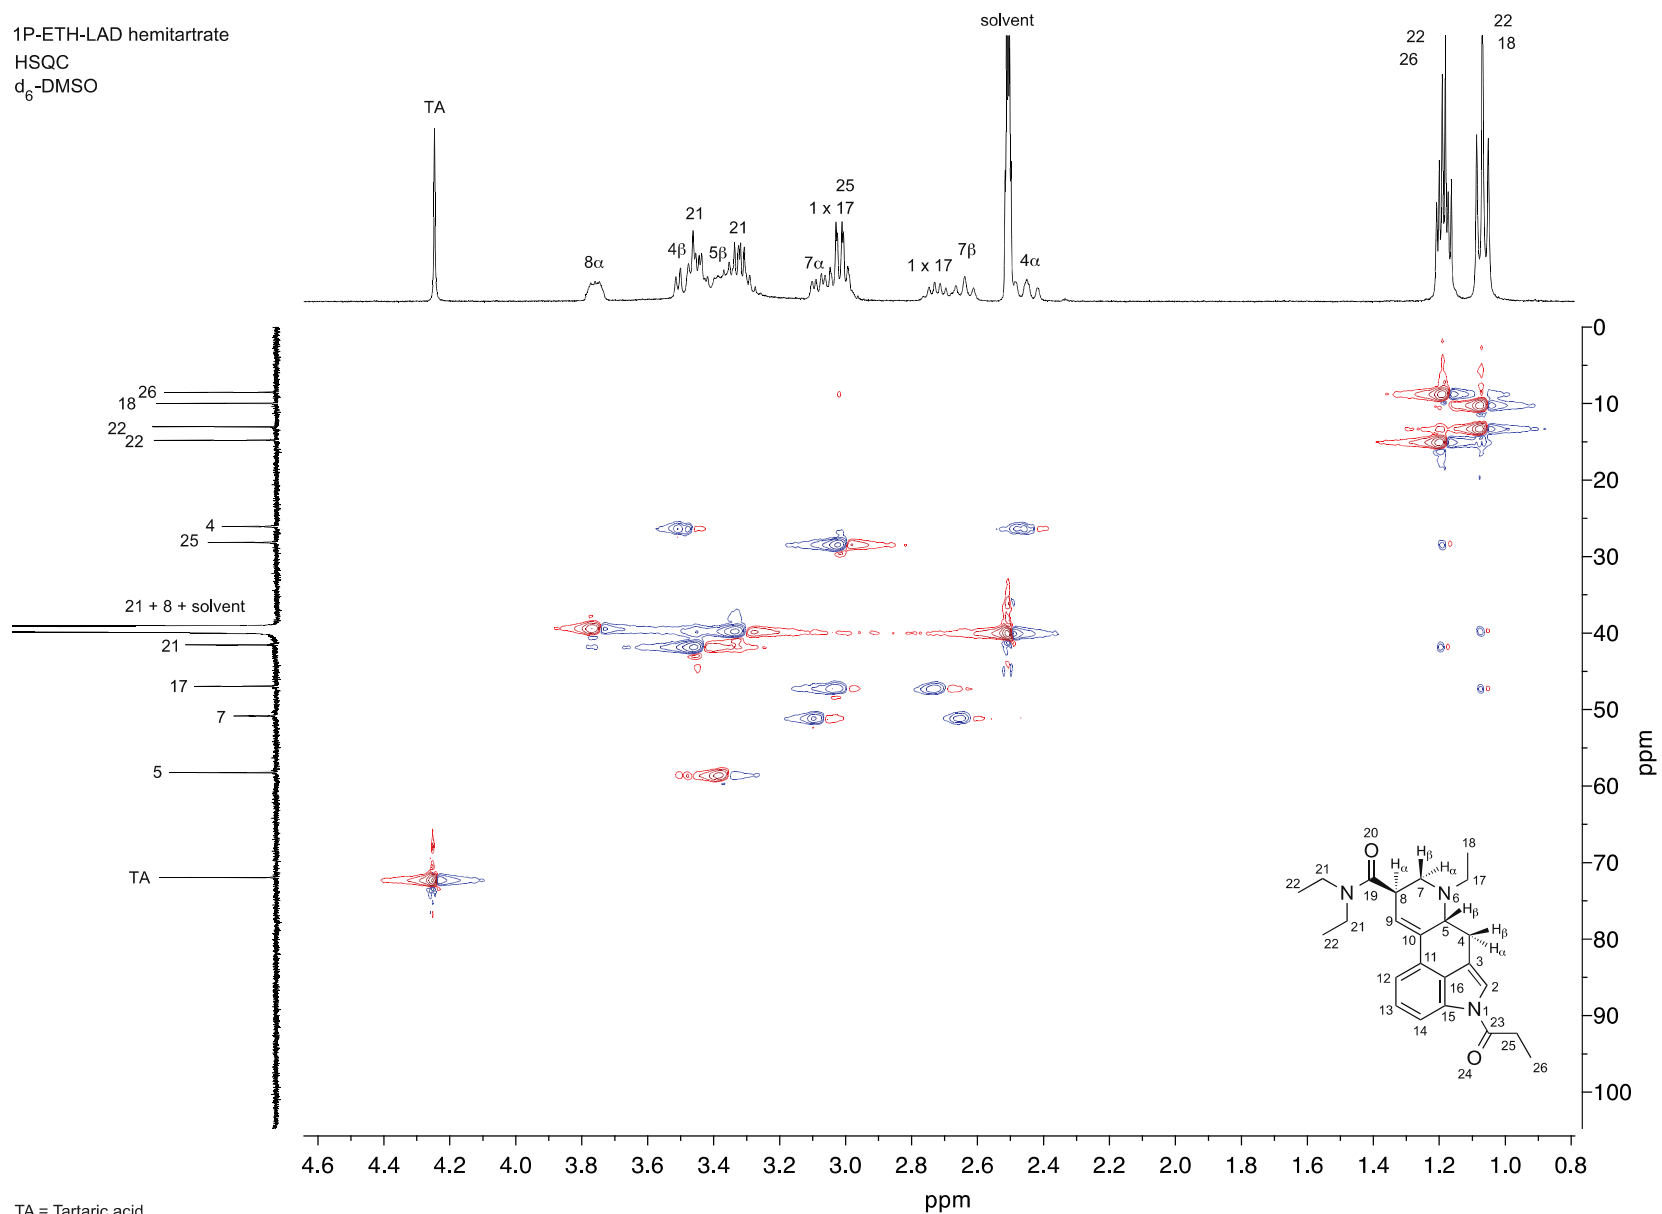

Drug Testing and Analysis – Brandt *et al.* – Supporting Information

1P-ETH-LAD hemitartrate  
HMBC  
d<sub>6</sub>-DMSO

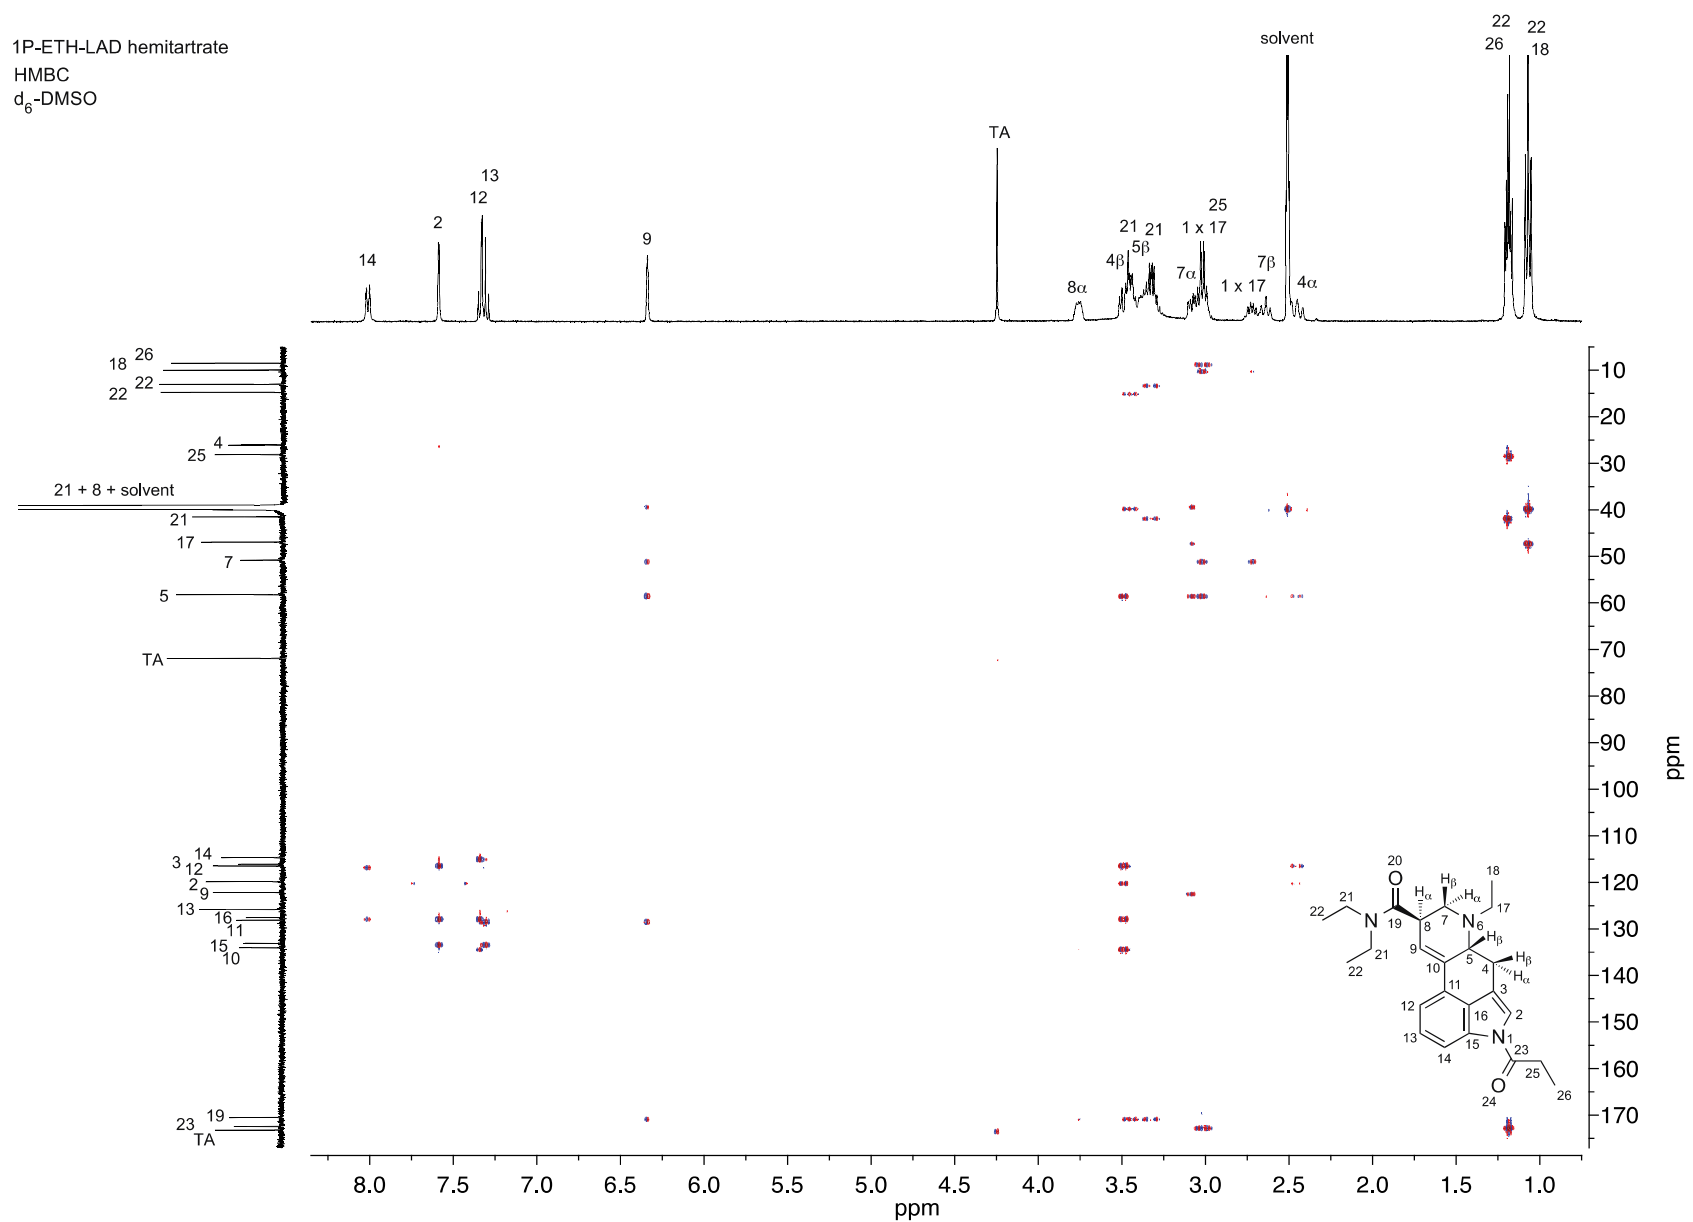

Drug Testing and Analysis – Brandt *et al.* – Supporting Information

1P-ETH-LAD hemitartrate  
 HMBC  
 d<sub>6</sub>-DMSO

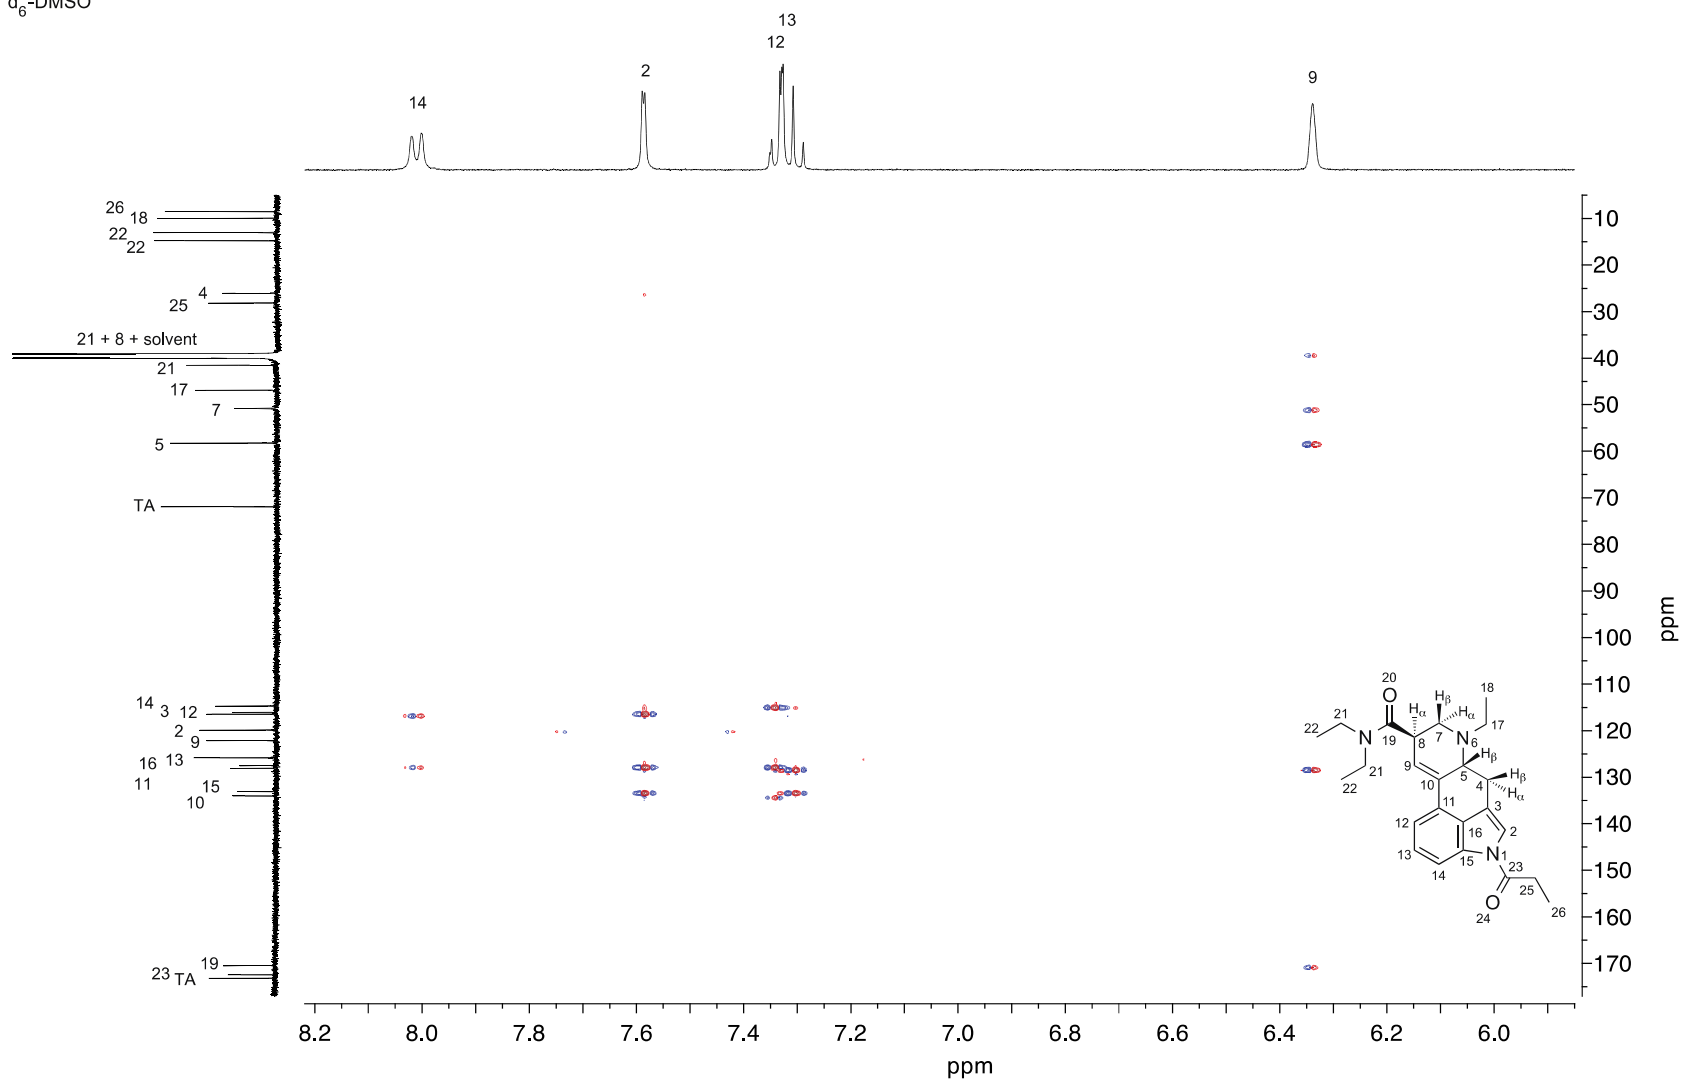

TA = Tartaric acid



Drug Testing and Analysis – Brandt *et al.* – Supporting Information

1P-ETH-LAD hemitartrate  
 HMBC  
 d<sub>6</sub>-DMSO

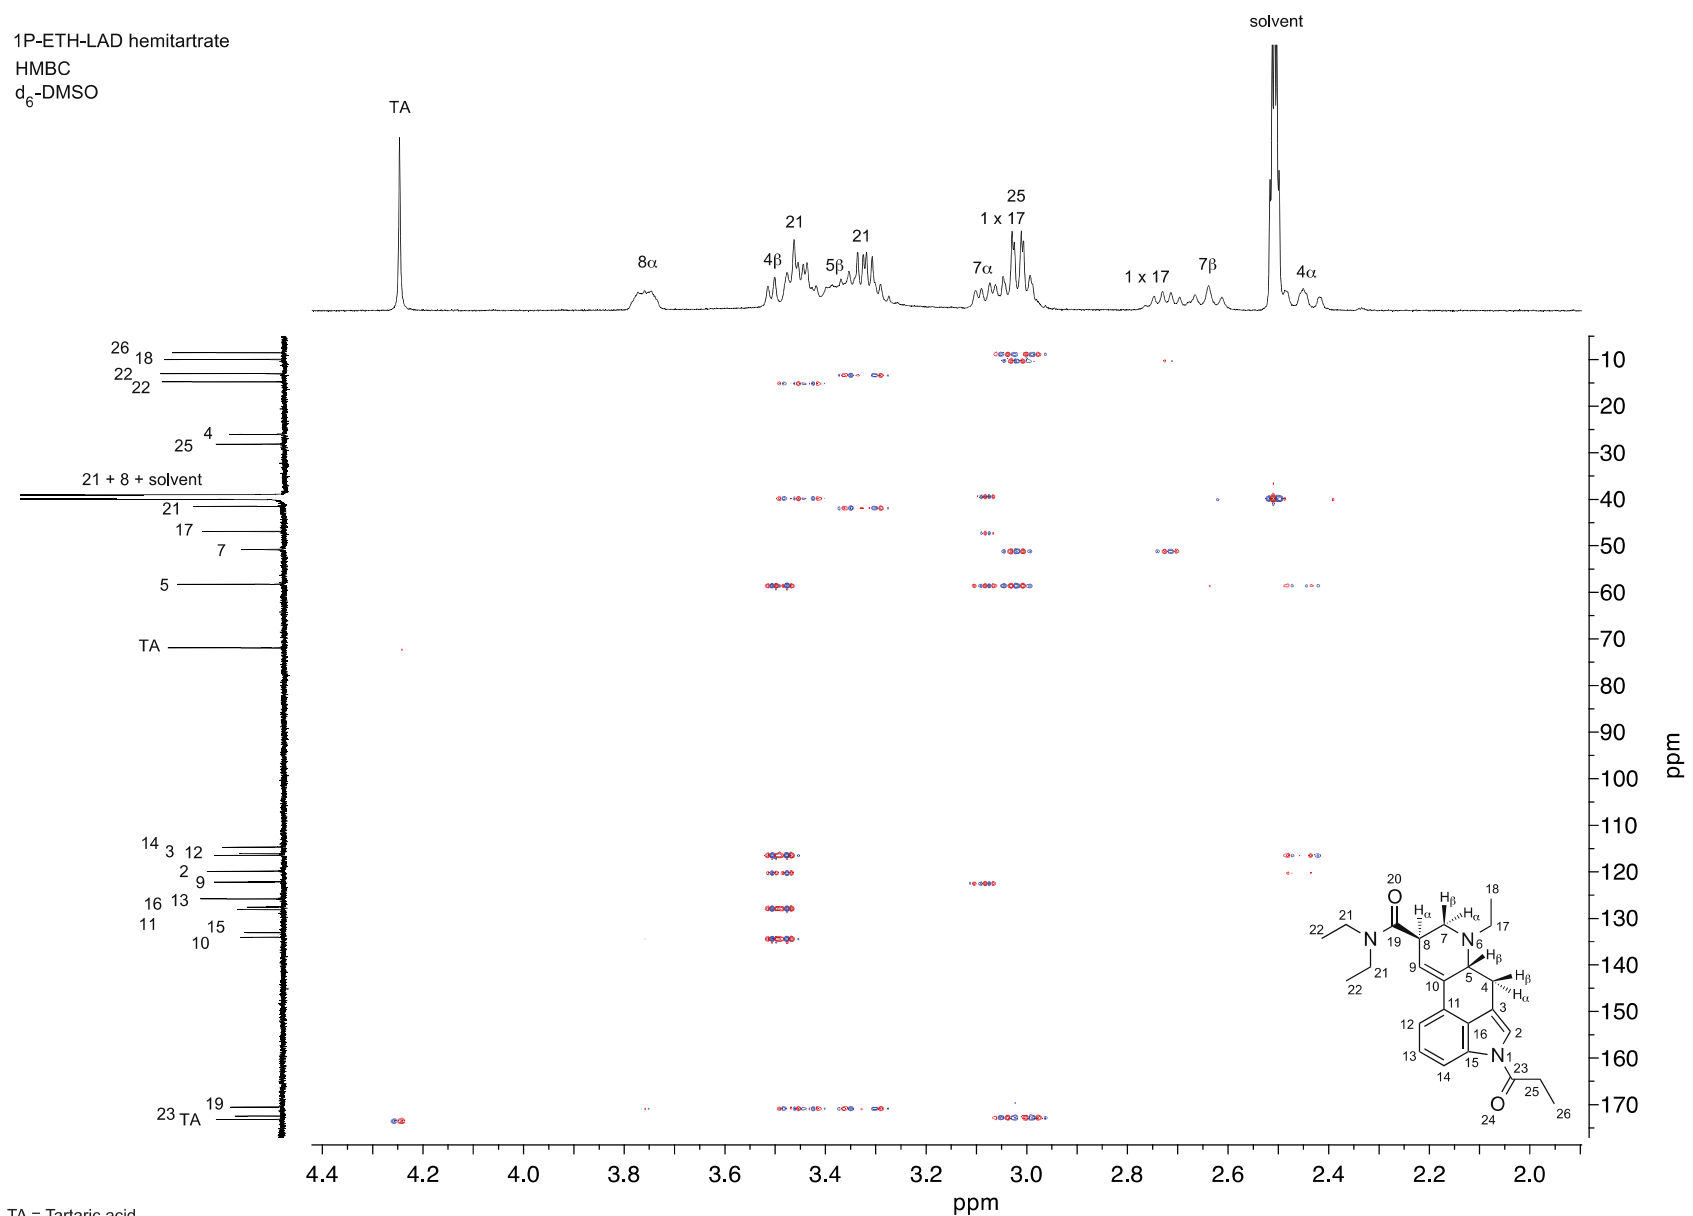

TA = Tartaric acid

Drug Testing and Analysis – Brandt *et al.* – Supporting Information

1P-ETH-LAD hemitartrate  
 HMBC  
 d<sub>6</sub>-DMSO

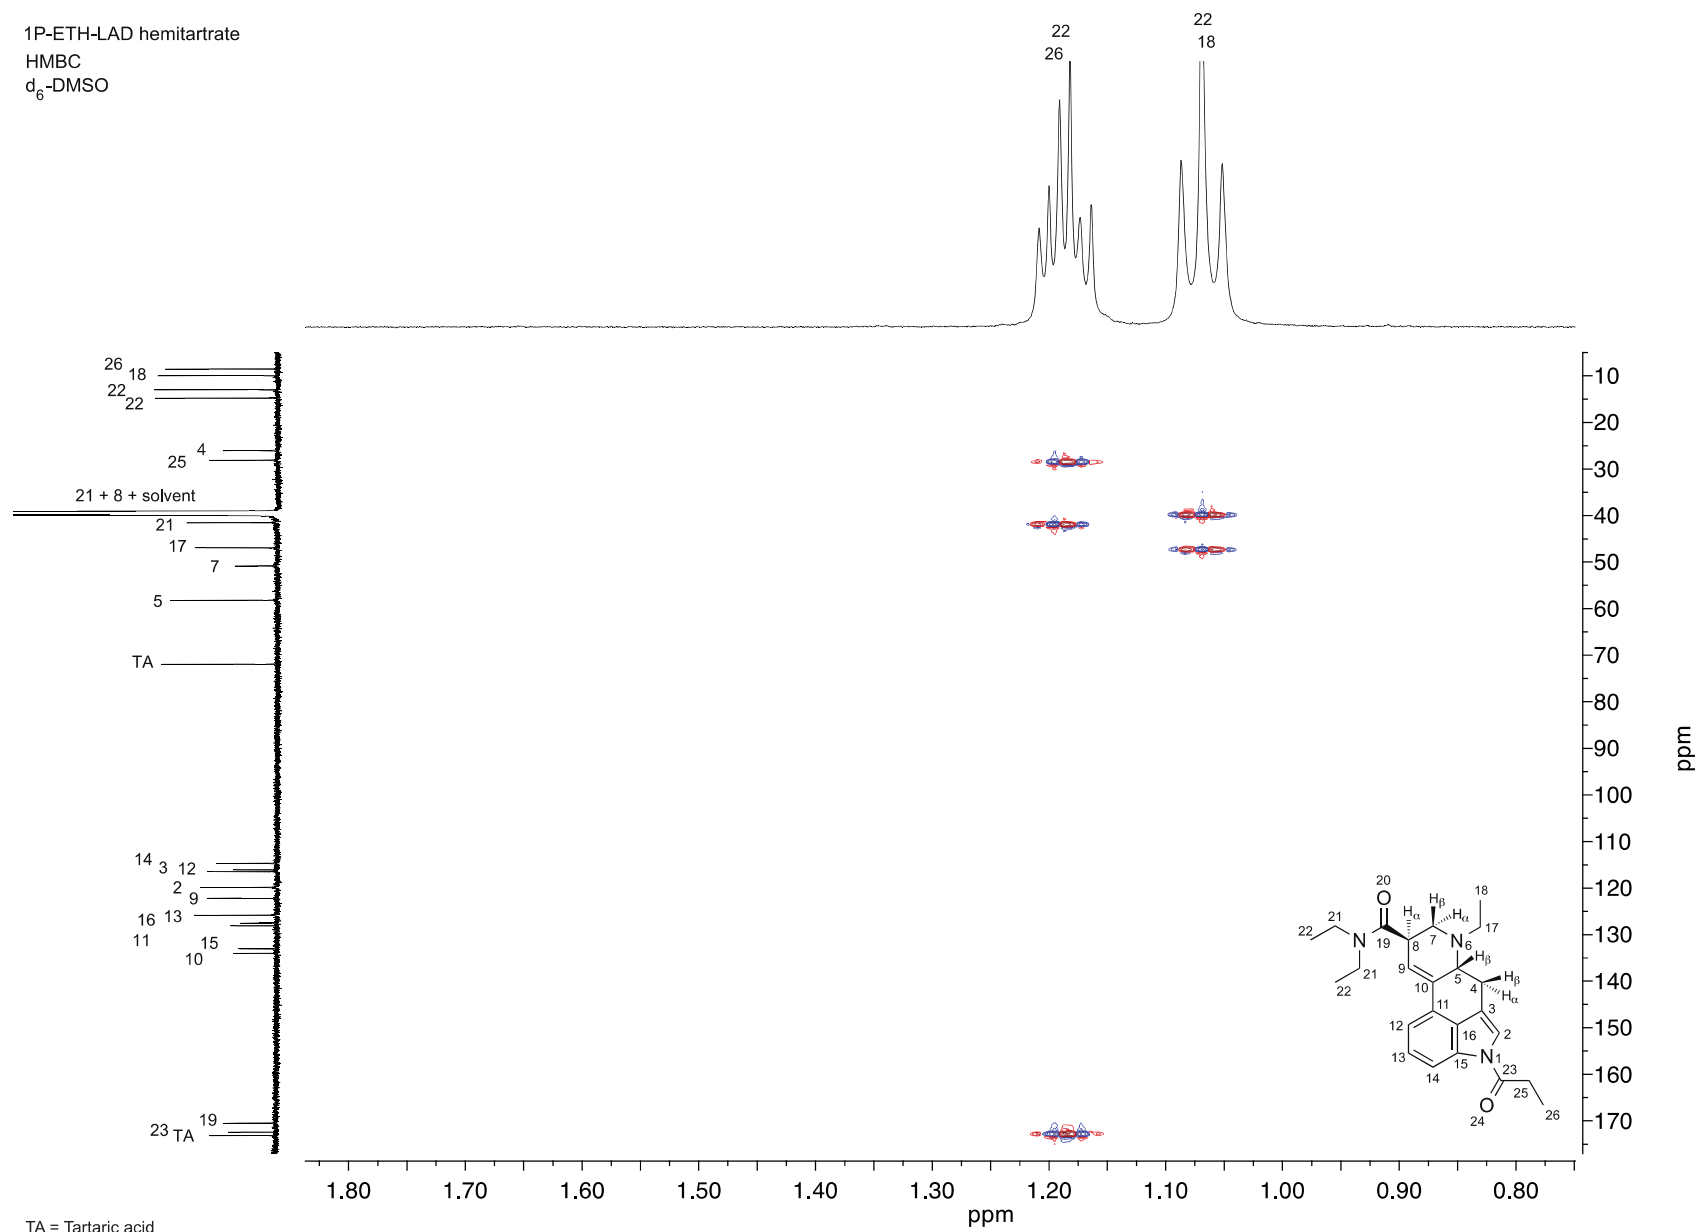

Supplement: NIHMS916736-supplement-1.pdf [file NIHMS916736-supplement-1.pdf]
